# Supplementary material for: Climate variability off Africa's southern Cape over the past 260 000 years
Source: Copernicus journal article supplement (doi:10.5194/cp-21-1383-2025), 2025-07-31
Supplement: Supplementary file 1 [file cp-21-1383-2025-supplement.zip]

## Sheet: Information
Supplement to:		Purcell, Karl; Simon, Margit H.; Pryor, Ellie J.; Armitage, Simon J.; van der Lubbe, H. (Jeroen) J. L.; Jansen, Eystein (2025): Climate variability off Africa’s southern Cape over the past 260,000 years. Climate of the Past,
Coverage:	LATITUDE: -35.3617 * LONGITUDE: 25.1717
	ELEVATION: -4078 m
Event(s):	MD20-3592 * CAMPAIGN: MD20-225 (ACCLIMATE2) * BASIS: Marion Dufresne (1995) (URI: https://www.flotteoceanographique.fr/en/Facilities/Vessels-Deep-water-submersible-vehicles-and-Mobile-equipments/Deep-sea-vessels/Marion-Dufresne) * METHOD/DEVICE: Calypso Corer (CALYPSO)

## Sheet: XRF scanning raw values
Purcell et al., 2025
Raw counts per second (cps) values for measured elements.
Depth	Age model	Total cps		Al	Si	P	S	Cl	Ar	K	Ca	Ti	V	Cr	Mn	Fe	Ni	Cu	Zn	Ga	Se	Br	Rb	Sr	Y	Zr	Ba	Ce	Ta	W	Pb	D1	S1	S2	S3	Mo inc	Mo coh	Dt
(mm)	(years)	(cps)	MSE	(cps)	(cps)	(cps)	(cps)	(cps)	(cps)	(cps)	(cps)	(cps)	(cps)	(cps)	(cps)	(cps)	(cps)	(cps)	(cps)	(cps)	(cps)	(cps)	(cps)	(cps)	(cps)	(cps)	(cps)	(cps)	(cps)	(cps)	(cps)	(cps)	(cps)	(cps)	(cps)	(cps)	(cps)
0	1909.1	45530	1.41	36	193	0	18	642	178	1280	25718	1043	38	90	194	29764	196	133	68	16	40	672	359	3093	24	828	15	33	0	36	88	226	475	7	31	22587	6716	0.346
0.2	1929	46385	1.41	26	231	0	0	700	196	1390	27072	1043	64	68	284	31698	93	182	106	0	37	618	377	3187	0	791	100	0	0	10	100	226	432	4	0	22327	7056	0.347
0.4	1948.8	45475	1.44	48	213	0	28	615	212	1334	25237	927	64	74	196	30575	152	168	97	0	58	677	411	3012	0	651	104	0	0	73	116	160	377	0	110	22150	6731	0.347
0.6	1968.7	44867	1.34	43	176	0	0	709	168	1233	23281	1003	70	81	206	30622	157	112	55	0	80	717	400	3079	0	736	34	20	0	77	35	182	450	0	0	22074	6879	0.347
0.8	1988.5	45598	1.23	49	204	0	0	676	176	1344	24161	1030	81	35	224	31814	128	171	155	79	120	695	353	3078	0	858	23	8	0	77	98	109	480	0	93	22161	6918	0.348
1	2008.4	45889	1.39	23	213	0	0	677	137	1272	22813	983	50	122	195	34897	186	179	107	47	110	759	408	2935	0	707	99	0	16	46	38	213	456	10	115	22549	6590	0.343
1.2	2028.3	46597	1.34	21	178	0	0	646	161	1275	23342	969	51	60	237	35577	144	105	99	0	33	593	306	2958	0	700	44	26	6	50	47	193	516	0	111	22440	6706	0.346
1.4	2048.1	46546	1.5	23	184	0	0	733	217	1220	23025	950	0	36	363	35554	121	107	116	0	56	564	354	2972	0	794	83	0	0	46	75	144	498	0	184	22640	6782	0.344
1.6	2068	46405	1.28	29	161	0	0	744	179	1223	23104	1000	114	84	926	35204	156	115	107	0	104	562	352	3071	0	642	0	26	12	0	83	192	551	0	132	22347	6460	0.348
1.8	2087.8	45761	1.42	32	173	0	8	807	200	1248	24277	1087	0	65	438	33919	187	118	87	16	89	573	371	3258	28	652	25	38	0	21	6	136	485	27	65	22300	6678	0.341
2	2088	46774	1.47	26	192	0	20	789	193	1327	24929	954	66	63	849	35791	131	82	104	0	76	547	352	3251	0	767	54	0	0	19	119	252	540	13	248	21802	6702	0.343
2.2	2110.6	45907	1.52	21	155	0	0	784	207	1425	25586	1025	32	86	862	33012	139	41	95	0	104	437	363	3236	0	653	42	12	10	27	8	221	481	0	36	21935	6837	0.342
2.4	2133.2	45540	1.5	10	190	0	0	709	158	1260	26022	991	66	72	647	31042	120	48	88	0	74	526	299	3260	0	581	40	25	53	54	103	207	470	0	184	21815	6877	0.344
2.6	2155.8	45168	1.47	24	177	0	0	742	194	1336	26181	856	42	81	527	30228	144	33	69	0	37	548	369	3320	0	694	41	14	0	103	73	88	453	20	12	22142	6624	0.343
2.8	2178.4	46308	1.5	34	185	0	15	751	207	1318	26940	980	40	61	351	31044	126	148	46	21	48	529	401	3359	0	734	62	13	0	5	63	175	458	0	67	22589	6983	0.344
3	2201	45796	1.44	30	205	0	4	781	204	1364	27118	1018	55	108	287	31297	142	96	72	0	52	611	419	3302	0	742	76	0	0	26	89	228	490	0	87	22451	6757	0.338
3.2	2223.6	45972	1.5	33	187	0	0	755	167	1426	26280	962	10	119	375	32164	130	97	124	9	43	640	370	3313	0	606	57	0	0	25	10	327	552	0	81	22333	6783	0.341
3.4	2246.2	46053	1.53	42	199	0	0	732	205	1310	26548	977	93	19	408	33296	183	51	131	38	105	628	321	3286	0	653	9	38	0	88	121	173	482	8	117	22237	6814	0.342
3.6	2268.8	46036	1.38	33	199	0	17	751	194	1361	25718	964	68	70	354	33157	140	82	46	0	138	578	281	3271	0	607	16	21	0	36	105	126	447	23	78	22452	6811	0.341
3.8	2291.4	46584	1.48	12	199	0	16	757	210	1377	26238	897	108	35	577	32863	134	85	111	0	85	524	328	3260	0	715	35	0	0	7	74	91	493	26	141	22341	6638	0.345
4	2314	46279	1.47	36	196	6	35	746	180	1298	25247	890	38	75	704	32985	156	53	162	0	81	578	387	3165	0	741	64	0	35	22	165	211	546	0	54	22236	6896	0.342
4.2	2334.2	46514	1.34	65	194	0	24	735	211	1346	26236	986	16	60	488	32675	170	57	104	0	111	547	327	3282	10	802	35	19	0	0	97	217	451	0	107	22437	6804	0.342
4.4	2354.4	46150	1.82	23	248	0	0	738	226	1463	27475	917	42	75	566	31330	138	118	51	0	0	684	287	3371	0	724	104	7	0	32	137	260	496	0	127	22831	6880	0.339
4.6	2374.6	45745	1.5	56	216	0	15	703	186	1361	27625	973	21	42	373	30221	162	121	109	0	59	597	411	3344	0	706	9	35	0	100	130	100	429	0	73	22666	6732	0.336
4.8	2394.8	45434	1.47	56	214	0	32	737	199	1307	26289	922	9	84	281	29397	145	144	102	0	108	690	347	3316	0	669	16	27	52	67	67	177	452	26	19	22687	6807	0.335
5	2415	46059	1.33	18	180	0	10	665	209	1315	26908	957	74	27	305	30514	161	207	123	0	38	658	389	3524	91	732	11	20	0	65	92	194	463	0	50	22690	6871	0.340
5.2	2434.2	45857	1.42	28	161	0	0	705	191	1304	26369	977	41	152	323	30251	169	160	137	0	34	615	306	3403	0	754	49	9	45	77	123	90	496	0	94	22601	6813	0.338
5.4	2453.4	45776	1.63	42	199	0	21	704	200	1392	27397	1045	54	62	280	27965	100	176	93	0	122	695	361	3548	0	638	38	7	44	17	52	30	381	0	113	22882	6791	0.343
5.6	2472.6	46016	1.34	36	198	0	0	735	208	1353	27227	954	73	69	371	28935	153	173	134	0	68	688	440	3640	41	710	98	0	32	0	55	86	390	21	60	23153	6996	0.337
5.8	2491.8	46619	1.31	29	202	0	0	771	184	1313	27499	988	30	48	402	29950	160	172	204	0	92	709	470	3468	15	816	11	36	59	7	112	125	422	36	142	23343	7143	0.341
6	2511	45974	1.38	24	170	0	16	800	187	1431	27194	952	16	60	345	27889	157	111	97	0	46	779	349	3504	0	879	58	25	92	9	124	215	440	0	106	23565	6945	0.339
6.2	2530.2	45116	1.38	35	149	0	21	808	186	1245	25506	923	69	60	334	27549	150	177	63	0	113	735	432	3591	90	767	52	10	0	40	131	101	447	10	42	23355	7097	0.336
6.4	2549.4	45838	1.62	48	218	0	0	738	192	1459	27177	1114	44	53	437	28790	155	131	73	0	61	649	339	3415	0	729	35	26	0	79	57	203	422	16	72	23092	6917	0.338
6.6	2568.6	45299	1.37	29	204	0	9	725	173	1400	27746	961	38	73	299	26893	130	105	72	0	88	570	256	3365	0	766	63	0	46	0	68	98	457	18	70	22832	6862	0.339
6.8	2587.8	45409	1.52	43	164	0	27	752	200	1378	27076	965	42	81	317	27431	142	49	78	0	61	644	248	3315	0	667	51	5	0	19	110	0	404	8	5	22760	6921	0.340
7	2607	45489	1.46	18	167	0	15	793	228	1368	28599	951	25	45	309	27148	171	88	124	0	14	592	371	3323	0	722	49	28	0	50	55	192	453	0	86	22768	6816	0.340
7.2	2626.4	45407	1.49	56	203	0	28	777	196	1481	28740	951	78	68	280	28115	156	139	107	26	60	600	334	3450	0	783	37	19	23	82	114	175	449	0	38	22391	6925	0.338
7.4	2645.8	45033	1.52	30	181	0	28	760	214	1368	27678	908	61	58	353	28459	105	140	97	0	66	515	345	3282	0	801	10	25	0	64	0	132	393	0	117	21924	6985	0.339
7.6	2665.2	45328	1.42	22	190	0	14	765	212	1449	27639	923	39	71	438	30405	165	92	74	0	81	501	340	3377	0	766	41	15	0	45	33	250	483	8	0	22446	7049	0.332
7.8	2684.6	45210	1.58	19	204	0	30	779	204	1394	28383	861	60	55	349	30308	171	87	134	0	132	580	265	3318	0	707	83	0	0	24	94	223	506	0	65	22776	6839	0.330
8	2704	45960	1.66	47	155	0	9	881	224	1266	26943	829	68	107	339	31986	132	77	93	0	79	627	221	3342	22	727	82	10	56	39	104	241	456	0	39	22997	6951	0.334
8.2	2723.6	45527	1.53	62	182	0	11	807	197	1292	27498	880	50	53	359	31513	108	120	125	49	59	518	305	3304	0	687	65	0	0	94	118	74	418	0	46	22181	6723	0.336
8.4	2743.2	45326	1.51	18	171	0	26	802	210	1148	26354	833	50	29	351	32698	167	52	92	0	84	603	182	3148	0	628	50	7	39	21	120	142	426	0	131	21639	6769	0.335
8.6	2762.8	44726	1.36	9	166	0	29	760	192	1231	28855	844	50	71	455	27310	187	165	125	0	113	716	394	3430	45	857	68	0	0	17	44	135	444	0	42	22841	6912	0.333
8.8	2782.4	44986	1.48	31	175	0	0	810	177	1370	29362	910	20	92	457	26426	224	287	74	53	123	599	325	3428	22	743	106	0	0	56	76	88	424	8	57	22884	6841	0.335
9	2802	45361	1.54	16	200	0	15	751	209	1294	28453	873	0	99	300	29334	174	151	98	0	49	660	275	3427	0	651	78	0	0	35	121	116	464	0	117	22655	6873	0.336
9.2	2821.6	45485	1.44	11	135	0	10	783	190	1151	25886	875	40	54	388	35112	186	93	118	41	167	561	328	3218	0	660	9	28	0	90	177	197	503	9	34	21742	6383	0.335
9.4	2841.2	45302	1.58	34	167	0	28	828	221	1293	27616	847	87	67	399	32660	172	69	122	0	109	598	354	3517	53	697	35	9	33	24	142	227	545	9	116	21744	6586	0.335
9.6	2860.8	44866	1.52	19	242	0	10	657	185	1309	30094	1003	75	26	369	29980	185	99	131	57	160	508	312	3498	0	611	8	16	5	67	147	40	464	0	83	21940	6546	0.333
9.8	2880.4	44061	1.35	13	180	0	0	756	163	1322	30311	930	45	41	410	24560	158	165	149	10	194	634	311	3697	10	754	8	11	33	27	36	197	345	0	0	22470	6825	0.332
10	2900	43048	1.91	7	160	0	31	752	190	1344	30634	869	70	29	409	24038	183	224	144	0	80	509	350	3829	0	639	50	27	34	0	0	168	427	0	70	22474	6909	0.319
10.2	2919.6	44013	1.33	22	217	0	5	652	203	1388	30964	849	46	35	354	25516	113	129	142	0	97	649	455	3555	39	709	28	10	0	0	37	125	403	0	52	22105	6681	0.329
10.4	2939.2	43766	1.46	41	196	0	0	809	213	1327	30452	902	0	75	266	25445	181	179	74	0	87	674	344	3845	0	731	75	19	0	33	89	122	395	0	97	22175	6901	0.327
10.6	2958.8	43194	1.42	29	196	0	42	839	205	1287	30353	777	35	63	279	24625	139	73	114	14	131	622	195	3625	12	774	63	0	26	84	91	145	358	0	130	22312	6821	0.324
10.8	2978.4	43363	1.45	0	193	0	19	712	247	1336	31868	867	60	81	305	24116	133	109	82	0	76	661	226	3621	0	666	82	0	0	0	49	76	334	0	0	21953	6756	0.329
11	2998	43884	1.6	16	227	0	18	681	204	1351	30483	911	73	23	291	27233	201	63	79	0	59	528	374	3533	0	793	36	33	22	52	54	196	439	17	0	21768	6683	0.330
11.2	3017.8	43493	1.36	26	216	0	0	697	196	1175	28706	790	68	26	280	28229	114	96	74	0	0	511	217	3460	0	666	65	0	0	102	112	221	386	0	78	21499	6600	0.330
11.4	3037.6	42876	1.56	45	168	4	12	730	215	1258	29588	941	32	51	287	26267	115	83	74	0	114	508	274	3458	0	613	56	0	0	40	84	158	350	0	56	21493	6969	0.325
11.6	3057.4	42352	1.41	32	159	0	17	729	275	1237	29631	894	5	50	252	24264	146	81	56	0	27	473	347	3580	75	754	64	45	78	25	41	128	377	13	94	21569	6884	0.328
11.8	3077.2	42546	1.46	40	181	0	10	700	199	1323	30254	848	65	41	239	24828	168	93	131	0	56	478	324	3627	0	753	35	16	27	0	0	231	374	0	17	21396	6524	0.331
12	3097	42145	1.45	65	171	0	18	741	230	1234	29073	849	59	60	254	23853	122	89	129	8	49	509	327	3598	0	715	5	32	0	0	55	113	393	0	9	21271	6626	0.331
12.2	3116.8	41834	1.46	44	189	0	0	612	237	1300	28904	862	30	60	251	23769	160	87	103	0	50	508	264	3476	0	715	25	21	0	23	101	108	406	0	27	21121	6785	0.328
12.4	3136.6	41386	1.3	17	175	0	23	686	224	1232	28088	783	22	50	232	23929	127	51	76	0	83	474	327	3485	0	810	57	16	8	93	164	146	339	0	95	21554	6740	0.326
12.6	3156.4	41222	1.69	16	170	0	29	721	225	1279	26982	817	59	63	224	25379	103	37	81	0	12	472	286	3348	13	747	44	16	0	26	139	0	368	29	61	20911	6703	0.325
12.8	3176.2	41223	1.46	24	181	0	0	670	224	1139	26073	770	48	50	242	25481	159	61	78	0	70	456	297	3342	0	671	99	0	0	94	61	142	408	27	0	21163	6696	0.325
13	3196	40690	1.37	17	137	0	7	648	233	1124	26261	770	31	95	212	23745	145	45	120	0	140	472	293	3457	55	820	63	0	80	45	0	274	399	0	102	21395	6524	0.323
13.2	3215.8	40021	1.33	51	121	0	0	737	204	1033	23931	711	28	73	233	23403	164	41	83	15	32	493	258	3300	27	640	32	9	17	24	65	233	330	0	82	21093	6436	0.325
13.4	3235.6	39983	1.61	18	126	0	15	684	272	1110	25225	736	39	69	248	23275	123	44	78	8	50	403	225	3265	0	646	85	0	0	12	9	27	389	10	92	21027	6466	0.328
13.6	3255.4	39866	1.39	0	136	0	0	642	205	1041	24809	696	37	33	226	23684	144	39	58	32	83	419	282	3457	91	702	53	22	8	55	144	183	386	0	57	20650	6532	0.329
13.8	3275.2	39308	1.4	22	167	0	0	664	209	1082	24253	766	18	16	307	23550	113	31	82	0	87	518	268	3269	0	617	0	48	57	11	63	290	409	0	113	20457	6286	0.328
14	3295	38803	1.55	50	112	0	20	791	235	871	20469	684	49	78	280	24085	128	50	47	0	51	396	195	3054	0	508	33	13	13	38	7	111	343	0	47	20427	6365	0.330
14.2	3315	40178	1.48	7	121	0	6	634	188	1079	23348	727	47	41	331	25387	128	39	49	14	127	491	269	3196	0	679	6	28	32	0	37	185	416	0	87	20188	6165	0.335
14.4	3335	39819	1.57	36	156	0	17	680	264	1019	23411	754	0	78	347	25036	139	30	27	0	73	458	311	3149	0	666	44	0	42	4	64	115	388	0	90	20496	6357	0.330
14.6	3355	39674	1.37	53	168	0	0	656	222	1078	24096	652	34	48	220	23094	126	129	10	0	116	510	252	3257	23	637	31	0	0	59	78	67	382	0	0	20341	6134	0.335
14.8	3375	39818	1.47	7	69	0	0	702	198	945	22627	684	22	13	238	26713	140	28	74	0	25	371	272	3203	0	588	0	38	17	0	60	96	445	10	0	19953	6263	0.336
15	3395	40070	1.56	29	99	0	5	746	230	892	21692	663	56	21	204	27836	108	20	50	0	54	504	267	3145	43	692	0	30	0	59	63	85	354	0	21	20001	6170	0.334
15.2	3414.8	39518	1.55	27	114	0	18	707	225	936	22839	668	43	42	242	24049	110	34	64	0	33	456	304	3191	0	708	21	4	6	48	0	90	443	0	47	19907	6482	0.337
15.4	3434.6	39390	1.27	35	137	0	13	700	185	1025	25413	729	35	61	209	22379	133	55	52	0	32	409	230	3373	0	629	51	0	62	72	58	182	343	0	71	19852	6330	0.334
15.6	3454.4	39883	1.26	0	133	0	0	620	193	1013	25475	761	0	57	189	22241	126	75	104	0	79	490	234	3394	0	695	23	16	0	44	168	168	320	0	0	20099	6345	0.340
15.8	3474.2	39355	1.4	34	139	0	18	652	246	987	24464	642	0	49	211	21144	86	85	63	0	96	414	313	3536	0	641	78	0	18	0	102	139	307	0	0	20229	6278	0.339
16	3494	39627	1.49	0	92	0	0	581	219	1037	25336	669	9	27	223	21305	108	124	36	0	62	453	300	3401	0	665	51	27	0	29	57	191	374	0	12	20080	5934	0.340
16.2	3514.2	39150	1.49	16	129	0	17	667	196	992	26088	658	32	25	329	19889	107	106	57	0	14	498	318	3452	18	683	41	10	0	23	59	105	289	15	16	20036	6176	0.340
16.4	3534.4	39537	1.4	12	154	0	8	618	194	1000	27367	750	15	52	275	20442	125	53	111	0	99	425	204	3357	0	524	20	5	28	0	56	38	294	0	0	20124	6104	0.336
16.6	3554.6	39745	1.61	24	168	0	11	597	220	1064	27030	724	39	45	272	20683	126	17	120	0	133	458	226	3415	0	542	42	11	14	48	57	131	358	0	78	19811	6367	0.338
16.8	3574.8	40236	1.55	11	127	0	0	647	217	1204	27776	709	30	68	313	22018	105	35	100	0	81	403	222	3408	0	682	62	9	38	74	60	97	312	0	37	20133	6432	0.337
17	3595	41025	1.56	15	149	0	20	657	237	1140	27824	710	8	45	239	23301	69	48	108	0	42	473	271	3511	0	746	17	17	74	85	26	128	417	0	0	20356	6301	0.336
17.2	3615	41149	1.44	35	149	0	9	644	213	1210	29543	757	38	47	254	22145	152	143	61	32	13	481	292	3600	0	678	74	11	0	49	83	70	315	0	96	20530	6594	0.335
17.4	3635	41017	1.5	0	162	0	8	627	218	1252	29965	716	31	50	259	22642	94	160	131	0	75	531	263	3581	0	727	68	27	22	43	158	55	358	7	6	20754	6516	0.328
17.6	3655	41762	1.42	14	155	0	6	673	196	1186	27993	721	55	64	277	25755	126	196	90	0	20	431	317	3537	0	668	42	0	20	103	73	118	358	0	60	20499	6560	0.330
17.8	3675	41352	1.45	24	123	0	15	711	188	1107	26458	756	30	72	347	26739	146	111	136	18	90	522	292	3418	0	477	41	7	53	44	87	78	440	0	80	20433	6420	0.329
18	3695	41584	1.48	29	160	0	0	647	180	1199	27724	784	38	45	296	25016	150	110	119	0	86	436	307	3418	0	714	7	15	26	5	72	80	461	0	0	20417	6347	0.334
18.2	3715	42046	1.49	21	175	0	5	599	182	1200	29447	672	45	61	227	24127	122	208	99	47	84	433	240	3692	0	632	85	0	16	36	84	213	486	0	36	20744	6519	0.340
18.4	3735	41772	1.37	0	155	0	0	594	214	1271	30778	762	49	81	245	21629	128	255	116	0	32	495	352	3660	120	731	59	5	18	65	146	102	409	0	175	20502	6386	0.338
18.6	3755	41844	1.45	49	165	0	5	603	199	1209	31131	786	34	50	245	22261	154	146	103	0	91	471	344	3663	0	561	16	7	4	0	131	115	361	0	107	20359	6588	0.338
18.8	3775	42149	1.45	15	171	0	19	606	213	1238	30379	726	28	28	218	23027	130	38	94	0	83	522	350	3707	6	637	61	0	0	98	76	99	350	0	112	20811	6770	0.339
19	3795	42563	1.44	21	187	0	6	644	191	1182	28806	761	52	0	321	26872	146	0	71	0	107	530	315	3496	0	646	9	0	45	63	159	141	375	0	140	21099	6698	0.335
19.2	3815	42846	1.44	42	129	0	0	688	191	1171	27835	705	55	23	333	29263	146	42	71	0	86	409	295	3319	11	747	12	12	0	0	120	40	465	0	175	20906	6605	0.339
19.4	3835	42818	1.36	25	158	0	24	697	209	1151	28456	691	35	47	303	28677	146	0	89	0	10	516	350	3337	0	732	39	12	33	26	103	216	429	0	27	20870	6610	0.336
19.6	3855	42242	1.39	15	115	0	0	715	213	1011	25802	676	5	34	292	28486	166	19	79	0	59	476	192	3443	0	557	39	5	37	92	55	124	428	0	99	20402	6441	0.336
19.8	3875	42460	1.53	33	191	0	18	691	239	1144	27164	764	32	45	285	27580	156	116	149	39	102	506	267	3356	0	546	26	23	0	19	73	131	448	0	42	20196	6446	0.340
20	3895	42016	1.48	26	165	0	0	652	199	1221	30008	767	34	35	264	24437	151	112	92	0	89	572	353	3553	35	733	31	0	34	65	80	131	394	0	0	20894	6704	0.333
20.2	3914.8	42183	1.52	37	160	0	0	635	202	1234	31171	805	23	95	282	22801	105	159	100	0	98	445	262	3641	0	595	6	9	71	74	68	187	346	17	33	20838	6465	0.338
20.4	3934.6	42122	1.34	43	184	0	11	670	197	1278	32079	769	20	59	270	21712	130	196	89	0	84	463	291	3641	0	564	41	36	0	46	49	103	310	0	15	20404	6661	0.338
20.6	3954.4	41887	1.53	16	142	0	0	685	227	1240	32591	774	92	59	235	21319	155	198	168	0	106	502	206	3812	0	661	63	14	0	69	192	105	409	0	60	21050	6591	0.334
20.8	3974.2	41895	1.49	0	160	0	0	673	206	1180	31767	689	43	50	282	21300	120	161	94	0	81	500	322	3759	0	653	55	8	0	71	163	0	406	20	0	21068	6570	0.338
21	3994	42179	1.34	21	150	0	10	617	179	1181	31258	663	17	46	236	22619	142	120	85	0	85	493	242	3690	0	666	43	13	37	33	45	67	424	0	82	20867	6558	0.338
21.2	4013.8	42366	1.25	51	189	0	16	605	223	1316	32719	728	34	78	284	22415	132	195	123	0	78	444	340	3705	0	655	63	0	0	89	35	127	459	0	57	20903	6457	0.339
21.4	4033.6	42061	1.42	30	175	0	22	601	191	1287	33663	871	0	59	291	21861	144	98	119	0	95	512	228	3726	0	835	20	32	74	100	194	69	413	0	93	20320	6548	0.337
21.6	4053.4	41784	1.44	32	167	0	13	628	190	1265	33685	678	34	48	286	21133	127	65	106	0	77	493	340	3883	32	693	98	0	0	22	90	181	347	0	52	20371	6551	0.335
21.8	4073.2	42112	1.44	33	183	0	0	653	212	1220	33469	755	49	51	327	21868	185	87	106	21	64	396	315	3727	21	834	30	12	0	37	65	93	343	0	79	20422	6318	0.338
22	4093	42132	1.46	14	195	0	0	589	192	1294	32857	794	53	52	252	21932	140	63	116	0	120	416	263	3822	0	646	34	17	0	106	72	169	356	0	200	20701	6366	0.336
22.2	4112.8	41498	1.49	35	169	0	10	649	237	1229	31342	737	49	47	282	21472	102	30	80	0	65	498	265	3695	0	647	34	18	29	73	75	96	352	0	49	20527	6632	0.332
22.4	4132.6	42005	1.38	20	155	0	15	703	178	1250	31719	830	19	59	295	21885	121	35	93	45	105	468	331	3809	0	645	0	70	0	102	103	206	357	0	65	20904	6609	0.336
22.6	4152.4	42241	1.5	16	147	0	12	713	208	1344	32077	753	57	72	305	22224	163	78	53	11	66	412	238	3798	0	798	28	0	0	121	138	89	394	0	0	20888	6672	0.333
22.8	4172.2	42454	1.34	36	185	0	0	663	176	1314	31779	766	25	31	311	22783	175	44	115	6	45	438	328	3842	0	631	86	0	0	58	19	168	399	0	0	20946	6772	0.334
23	4192	41780	1.49	11	147	0	8	640	183	1190	31149	818	44	45	297	22883	139	109	119	0	105	470	228	3724	0	659	0	21	0	62	60	164	438	0	45	20688	6603	0.332
23.2	4211.8	42161	1.56	17	171	0	8	616	179	1279	31781	762	58	40	216	22986	91	78	128	0	76	498	334	3910	0	654	59	0	0	89	111	87	429	0	0	21417	6619	0.333
23.4	4231.6	42479	1.46	45	193	0	7	689	192	1289	31575	736	41	44	262	23198	116	37	61	0	37	511	281	3511	0	682	37	0	0	54	34	139	380	0	49	21192	6783	0.336
23.6	4251.4	42640	1.46	28	134	0	0	636	213	1261	31911	863	28	61	234	23966	155	24	74	0	41	524	275	3705	0	617	33	0	0	23	74	184	379	26	118	21011	6699	0.333
23.8	4271.2	42178	1.36	20	169	0	11	618	194	1251	32177	758	14	52	222	23251	126	25	91	0	100	521	219	3707	0	763	34	28	0	92	149	135	375	0	14	20993	6475	0.330
24	4291	42270	1.44	14	158	0	0	621	206	1211	32196	756	61	21	279	23421	153	39	64	0	92	531	218	3738	0	633	16	25	28	73	50	141	396	0	0	20480	6715	0.330
24.2	4310.4	42700	1.52	0	192	0	0	621	218	1283	32353	796	48	85	269	23724	138	21	53	0	18	436	239	3841	29	726	79	0	18	147	0	182	369	0	31	21299	6721	0.330
24.4	4329.8	42901	1.41	30	149	0	0	744	183	1221	30782	779	11	43	248	25746	135	0	65	19	48	458	249	3797	0	737	44	15	0	4	91	198	386	0	201	21596	6648	0.327
24.6	4349.2	42949	1.44	32	172	0	33	714	224	1158	29611	744	12	38	329	27624	146	36	100	26	91	469	314	3679	0	632	61	0	0	54	54	195	407	0	47	20569	6451	0.331
24.8	4368.6	42926	1.36	34	190	0	24	800	194	1212	29162	782	45	59	286	28294	89	18	50	24	85	492	212	3533	0	760	49	0	0	63	20	187	445	0	15	20812	6655	0.329
25	4388	43197	1.48	38	166	0	29	777	196	1275	30870	786	4	49	283	26363	126	15	90	0	0	378	284	3670	0	615	76	0	0	80	87	44	426	13	168	20714	6533	0.335
25.2	4407.2	42830	1.47	23	181	0	28	755	221	1172	30085	712	41	43	291	25151	179	116	113	34	88	451	310	3751	12	675	24	37	0	64	153	172	449	0	112	20953	6479	0.334
25.4	4426.4	42784	1.56	27	166	0	18	714	187	1228	31100	828	48	11	273	24260	164	73	55	0	31	498	280	3802	31	633	23	8	0	29	53	170	420	0	37	21244	6593	0.333
25.6	4445.6	42305	1.31	28	177	0	10	667	233	1264	31230	800	16	51	257	22852	131	79	118	0	110	470	230	3654	0	613	5	7	35	12	79	41	339	0	161	21149	6820	0.333
25.8	4464.8	43010	1.35	32	178	0	13	655	195	1217	31790	842	0	28	360	23114	137	109	123	21	7	571	324	3670	0	947	0	27	0	148	176	145	397	0	104	21067	6876	0.338
26	4484	43756	1.43	21	189	0	17	668	192	1275	30014	803	0	83	264	27049	110	98	82	6	124	500	330	3726	0	680	24	12	0	75	97	180	402	0	145	21543	6757	0.337
26.2	4503	43903	1.5	40	157	0	9	719	205	1213	29719	716	36	87	298	31393	146	47	72	0	42	433	249	3498	0	679	30	11	42	77	121	82	478	28	89	21120	6603	0.327
26.4	4522	43285	1.27	31	174	0	9	641	182	1255	30678	747	0	56	270	27273	164	51	99	0	67	552	299	3591	0	740	41	24	0	88	125	140	451	0	109	21263	6624	0.329
26.6	4541	43484	1.34	21	195	0	24	724	193	1305	32464	802	39	65	279	25539	135	87	71	0	143	494	318	3709	43	693	40	6	0	32	69	124	349	0	61	20963	6642	0.336
26.8	4560	43604	1.45	55	187	0	10	758	193	1296	33156	687	38	69	298	25801	148	212	138	22	150	455	235	3718	0	575	79	0	16	77	41	85	461	0	136	21190	6681	0.331
27	4579	43691	1.48	62	167	0	7	677	209	1320	34168	829	31	27	314	25358	169	247	168	0	68	478	219	3863	0	552	23	25	0	35	74	184	407	0	148	21828	6828	0.329
27.2	4597.2	43725	1.41	35	178	0	5	670	166	1307	33958	826	44	63	381	25070	141	201	111	0	58	458	341	3846	0	655	40	0	0	18	28	127	484	0	50	21432	6674	0.331
27.4	4615.4	43370	1.45	35	196	0	13	698	172	1370	34398	738	15	32	262	24146	173	197	115	0	38	451	366	3942	0	746	51	0	23	35	112	132	468	0	72	21670	7061	0.327
27.6	4633.6	43360	1.53	32	160	0	0	760	188	1217	31290	651	36	53	325	25586	165	186	47	0	51	492	381	3920	0	663	45	0	37	0	38	132	398	0	0	21056	6462	0.332
27.8	4651.8	43552	1.49	39	157	0	29	659	218	1197	32890	845	19	49	362	24333	165	159	96	0	38	624	357	3917	0	693	8	18	0	25	72	199	340	0	57	22064	6744	0.331
28	4670	43919	1.39	63	143	0	10	730	184	1246	33423	782	44	26	357	24861	122	185	142	0	54	523	221	3901	48	551	43	0	0	36	84	230	364	0	146	21819	6769	0.333
28.2	4688	44028	1.37	32	164	0	5	746	201	1254	32795	883	42	54	281	25085	135	224	103	39	172	480	272	4013	0	638	28	10	47	124	71	164	391	0	130	21460	6651	0.335
28.4	4706	44053	1.46	21	168	0	10	706	184	1265	33399	782	49	56	348	24557	134	153	33	0	64	435	244	4031	0	722	37	0	7	0	0	267	407	5	81	21652	6829	0.335
28.6	4724	43528	1.6	7	136	0	6	818	199	1205	31412	654	50	35	396	25357	143	106	70	0	106	473	324	3852	57	767	26	22	0	6	82	106	426	0	25	21422	6859	0.333
28.8	4742	43057	1.4	34	152	0	29	777	243	1110	31145	699	76	46	405	24058	140	109	150	12	116	554	309	3792	0	789	37	6	0	32	108	114	527	0	47	21338	6775	0.329
29	4760	43679	1.4	28	170	0	10	865	213	1229	32726	791	33	51	373	23881	164	129	131	0	58	474	260	3927	0	651	44	0	0	32	53	200	467	0	115	21733	6837	0.333
29.2	4777.6	43395	1.53	37	145	0	27	795	221	1230	33821	756	40	32	430	22434	147	99	72	0	39	389	344	4062	0	707	56	0	0	18	59	168	394	0	33	21526	6868	0.331
29.4	4795.2	43634	1.58	20	157	0	0	796	204	1238	34271	773	38	31	274	22951	134	103	136	0	108	485	236	4095	64	655	21	32	22	107	33	142	400	0	123	21388	6606	0.330
29.6	4812.8	43718	1.27	26	186	0	0	711	198	1255	36285	769	37	67	271	22414	128	120	61	6	106	579	332	4201	71	719	31	6	0	81	152	169	337	0	152	22191	7179	0.331
29.8	4830.4	43900	1.38	23	165	0	17	807	215	1276	36389	757	31	86	251	21840	166	120	134	0	169	467	397	4233	0	721	44	0	0	67	113	202	439	10	37	21417	6651	0.334
30	4848	43442	1.34	33	143	0	28	806	182	1164	33794	676	55	84	278	20929	168	114	106	36	98	592	258	4148	0	747	35	15	0	94	39	119	423	0	108	21986	6848	0.332
30.2	4865.4	43924	1.32	21	150	0	0	793	206	1271	35229	835	31	55	236	22214	121	114	161	0	13	549	253	4125	0	671	0	14	0	53	104	218	371	0	119	22057	7008	0.333
30.4	4882.8	44570	1.37	17	188	0	0	740	153	1356	36373	844	24	18	303	23924	153	132	134	5	81	512	309	4176	9	603	18	22	0	103	99	73	351	0	156	21856	6882	0.334
30.6	4900.2	44379	1.34	33	158	0	4	768	174	1278	34907	684	35	72	265	23996	154	69	136	14	113	547	308	4179	49	652	83	0	0	70	46	263	428	0	103	22145	6673	0.333
30.8	4917.6	44731	1.28	35	171	0	0	759	197	1300	34262	834	42	65	334	26086	160	65	136	0	77	497	304	4141	0	595	35	0	0	92	211	184	447	0	109	21646	7150	0.330
31	4935	44777	1.43	17	183	0	27	732	188	1236	34173	742	27	59	369	26353	150	71	115	0	135	486	313	3857	0	771	75	0	0	55	406	250	413	0	143	21265	6903	0.331
31.2	4952	44362	1.8	0	179	0	8	700	187	1357	37052	747	34	58	295	23943	90	64	102	0	60	404	308	4123	0	762	49	21	41	40	138	142	345	0	96	21467	6821	0.327
31.4	4969	44191	1.38	29	183	0	0	671	172	1346	37526	878	0	62	310	22647	125	78	24	0	40	466	194	4199	5	638	24	0	0	64	64	110	363	0	41	21500	6977	0.333
31.6	4986	43711	1.43	43	165	0	4	727	178	1370	36953	767	42	36	316	22981	179	87	88	21	73	464	268	4157	0	794	0	34	0	39	90	142	488	0	11	21461	6877	0.325
31.8	5003	44193	1.43	14	159	0	12	764	166	1335	36759	780	25	56	337	23155	134	86	49	0	97	530	282	4187	0	740	50	7	0	104	11	75	399	16	17	22014	7241	0.326
32	5020	44612	1.41	52	187	0	7	772	182	1353	37103	776	0	32	237	24280	153	87	46	0	148	515	342	4166	81	775	41	7	0	26	41	140	394	0	138	22222	6805	0.327
32.2	5037.2	45040	1.43	13	153	0	4	712	205	1429	37921	824	53	21	309	24296	172	108	138	0	10	478	369	4282	79	728	26	8	0	29	107	126	401	0	77	22043	6830	0.329
32.4	5054.4	45459	1.59	8	197	0	0	651	167	1444	38145	849	70	32	320	25788	138	41	95	0	95	568	298	4299	0	784	25	13	0	84	26	175	381	13	74	22057	6998	0.326
32.6	5071.6	46205	1.37	21	196	0	0	742	153	1419	39393	913	32	58	384	25976	177	92	109	0	110	480	352	4277	86	677	50	5	0	73	48	133	462	0	163	22088	7138	0.330
32.8	5088.8	46388	1.54	54	193	0	0	777	201	1285	37320	886	30	42	348	28648	190	69	60	0	79	463	429	4149	19	733	23	6	0	39	84	205	435	0	128	22283	7132	0.327
33	5106	47017	1.59	10	202	0	0	826	157	1394	34981	900	0	66	337	32573	121	36	38	0	50	527	371	4011	0	657	29	17	0	72	7	238	450	0	146	22515	7202	0.329
33.2	5122.8	46718	1.41	18	215	0	9	771	174	1423	35553	797	14	24	335	31536	151	51	85	0	109	510	352	4015	76	744	47	10	0	10	100	149	515	0	83	22671	6820	0.330
33.4	5139.6	45880	1.48	36	183	0	20	809	177	1335	35097	692	44	43	310	29489	127	60	17	0	74	481	178	3943	87	737	71	27	0	66	0	196	437	0	62	22778	6945	0.330
33.6	5156.4	45567	1.56	17	235	0	35	708	168	1478	39722	850	37	97	321	25833	173	138	49	0	106	555	332	4154	17	702	45	20	0	9	45	85	439	36	139	21958	6830	0.327
33.8	5173.2	46531	1.59	18	233	0	15	681	120	1476	40713	820	51	83	350	25833	177	59	124	0	53	555	294	4383	0	708	70	7	10	7	76	144	465	0	169	22856	7178	0.330
34	5190	45692	1.44	43	185	0	9	779	155	1340	39461	891	20	35	306	25075	146	104	56	0	110	543	323	4357	0	755	0	29	0	75	119	171	455	17	130	22206	7008	0.327
34.2	5206.6	46467	1.43	32	177	0	7	741	170	1347	36876	749	47	44	328	28706	162	50	106	0	56	544	283	4228	0	730	72	0	0	42	0	105	467	0	15	22701	6966	0.331
34.4	5223.2	47166	1.4	40	194	0	0	760	168	1339	34986	777	28	28	367	32428	132	48	112	0	94	577	268	4137	38	755	43	0	61	31	101	84	531	0	134	22573	6987	0.331
34.6	5239.8	46337	1.46	34	199	0	13	706	183	1506	37837	766	52	52	337	28828	170	11	79	0	25	620	271	4195	0	688	60	7	0	5	92	62	439	6	37	22455	6770	0.325
34.8	5256.4	46008	1.49	35	179	0	0	755	172	1378	35987	827	11	53	298	27958	139	53	73	0	53	518	259	4198	0	684	13	17	38	0	79	150	520	0	0	22697	6914	0.326
35	5273	47589	1.52	21	187	0	19	817	130	1401	36829	833	48	17	334	31457	181	83	114	8	129	546	341	4125	25	669	58	15	0	70	7	373	461	50	66	22731	6969	0.330
35.2	5289.6	47927	1.53	30	199	0	0	750	141	1418	37437	846	35	79	323	31661	164	92	79	0	131	514	245	4208	103	665	32	5	0	89	87	211	516	0	54	22689	7044	0.333
35.4	5306.2	46802	1.37	31	166	0	0	761	156	1341	36873	806	24	39	320	27922	180	103	73	0	71	576	244	4247	0	732	74	14	0	68	107	138	471	0	127	22941	7071	0.329
35.6	5322.8	47072	1.42	27	161	0	30	818	176	1377	38329	858	16	73	331	26595	173	72	83	0	78	617	343	4284	0	702	18	0	11	69	24	109	422	25	223	23178	7246	0.331
35.8	5339.4	46995	1.58	23	201	0	0	772	178	1325	37995	902	38	61	364	26406	126	100	103	19	82	567	304	4185	35	804	32	0	0	70	110	22	446	0	164	23201	7048	0.330
36	5356	46533	1.93	33	189	0	14	886	210	1390	35374	791	62	92	376	26784	125	128	106	48	42	646	298	4163	0	772	70	16	0	59	0	273	389	0	95	23106	6967	0.330
36.2	5372.6	44570	1.64	5	135	0	20	771	195	1101	31632	817	61	59	376	24853	152	43	39	0	9	631	215	4084	56	747	58	9	0	28	77	107	404	0	159	22903	7058	0.334
36.4	5389.2	45781	1.45	21	164	0	30	730	150	1204	34807	767	32	32	352	26308	181	67	104	0	154	662	254	4158	22	613	57	26	0	4	10	143	410	0	144	22721	7016	0.335
36.6	5405.8	45976	1.4	44	175	0	16	774	154	1222	36087	708	7	54	322	26933	165	53	90	0	118	572	263	4097	0	709	79	0	0	42	48	185	431	0	0	22904	6898	0.332
36.8	5422.4	46176	1.53	55	176	0	0	711	158	1347	36808	742	71	76	365	25963	172	99	151	0	164	508	230	4176	0	742	64	0	0	94	134	221	417	0	193	22378	7026	0.336
37	5439	45798	1.67	29	146	0	16	735	192	1318	36242	786	84	55	386	23973	171	112	107	0	137	547	245	4188	0	739	75	14	0	0	67	153	436	0	60	23302	7163	0.333
37.2	5455.4	45290	1.26	34	183	0	0	717	202	1310	36672	857	65	51	293	22908	180	145	159	0	113	596	333	4117	0	743	11	25	0	36	109	77	452	0	141	22950	6989	0.330
37.4	5471.8	44979	1.42	23	171	0	0	769	176	1204	33700	797	23	50	300	24937	154	117	92	0	85	518	286	3971	0	562	18	28	0	8	130	76	418	0	85	22508	6772	0.331
37.6	5488.2	43701	1.38	41	158	0	0	762	158	1164	30760	723	59	50	295	25488	177	116	130	0	94	470	291	3911	22	739	46	0	0	41	118	132	453	6	210	21690	6814	0.330
37.8	5504.6	44025	1.35	37	149	0	6	683	168	1206	35915	720	18	47	341	22678	185	128	80	0	78	565	224	4067	57	764	66	0	0	57	24	301	390	0	13	21764	6680	0.331
38	5521	43918	1.97	15	187	0	30	674	219	1422	37164	890	53	68	442	22455	174	142	157	0	125	539	287	4181	35	722	57	48	54	14	144	185	404	0	163	22146	7105	0.327
38.2	5537.6	43206	1.44	49	194	0	22	617	171	1312	37677	797	20	67	322	21098	178	116	154	28	61	562	235	4007	34	703	50	0	0	70	134	167	412	0	85	21310	6656	0.328
38.4	5554.2	42945	1.49	12	196	0	0	580	179	1333	37069	758	26	51	317	20941	145	101	107	0	71	458	170	4028	0	757	41	6	0	0	11	267	401	0	88	21216	6696	0.330
38.6	5570.8	42349	1.34	32	141	0	14	653	181	1208	34436	806	64	22	314	20673	100	91	164	0	63	405	194	3971	0	665	0	19	0	98	62	78	352	0	70	21117	6758	0.333
38.8	5587.4	42461	1.4	35	179	0	17	686	180	1336	34530	772	32	50	292	21010	151	101	84	0	124	572	336	3998	0	797	38	9	0	123	157	146	389	0	138	21274	6733	0.331
39	5604	42416	1.4	0	162	0	16	717	176	1083	32434	724	7	76	286	20443	153	86	116	0	15	510	313	4180	0	672	6	33	0	81	47	151	387	0	58	21417	6550	0.333
39.2	5620.6	42856	1.37	29	156	0	25	853	171	1102	32152	715	29	43	308	20788	113	33	109	7	98	467	316	4054	0	565	77	0	64	0	111	109	364	16	61	22018	6759	0.332
39.4	5637.2	43050	1.84	12	202	0	10	671	208	1398	38057	848	0	48	285	22209	166	7	46	0	105	450	308	4075	0	643	99	0	27	40	117	177	357	0	152	21062	6689	0.327
39.6	5653.8	43184	1.48	17	169	0	0	696	159	1385	37635	766	61	52	303	22140	159	83	98	0	20	486	258	4066	20	725	72	0	16	39	71	113	397	0	156	20908	7023	0.332
39.8	5670.4	43686	1.31	12	209	0	37	649	183	1309	38294	803	31	50	282	23119	94	36	40	0	93	502	322	4195	0	662	53	4	0	24	40	233	424	0	7	21260	6897	0.331
40	5687	43645	1.43	40	170	0	8	670	217	1395	39099	882	20	59	322	22622	179	41	99	0	120	547	247	4026	11	709	10	38	0	107	120	149	386	15	105	21101	6712	0.334
40.2	5703.4	43801	1.55	23	205	0	7	707	193	1423	39654	765	77	80	332	22821	163	33	115	32	28	475	275	4239	0	756	47	14	0	84	147	69	412	20	90	20438	6711	0.333
40.4	5719.8	43148	1.33	28	181	0	0	618	180	1324	38245	880	35	40	352	22404	154	59	58	0	95	487	326	4015	33	825	7	27	0	49	224	18	432	0	123	20776	6618	0.332
40.6	5736.2	42565	1.38	32	169	0	0	608	183	1324	37561	748	57	67	333	21894	195	65	82	0	78	363	290	4071	69	765	58	0	0	70	61	110	381	0	121	20787	6562	0.328
40.8	5752.6	42509	1.44	10	169	0	0	665	165	1328	37332	729	27	44	250	21413	101	25	96	0	29	449	250	3906	0	686	60	0	0	77	72	0	384	11	0	20780	6844	0.326
41	5769	43351	1.42	0	193	0	0	637	182	1335	37789	836	0	23	264	22470	165	154	81	0	98	379	347	4165	0	741	15	49	0	81	31	98	354	9	43	20858	6814	0.328
41.2	5785.6	43136	1.42	32	206	0	0	711	154	1314	38212	803	9	65	327	22199	148	182	129	10	40	550	264	4225	0	712	45	0	0	60	34	113	350	24	72	21160	6683	0.324
41.4	5802.2	43587	1.39	43	195	0	15	672	190	1316	37748	826	40	45	321	22722	142	87	128	0	69	489	296	4200	76	688	15	17	0	82	8	190	378	0	18	21211	7038	0.328
41.6	5818.8	43572	1.36	31	182	0	28	743	201	1337	37714	902	26	53	361	21749	180	46	34	0	54	441	256	4213	0	712	38	10	0	23	60	193	392	5	47	21859	6619	0.326
41.8	5835.4	43437	1.32	56	191	0	0	689	173	1351	37181	648	7	50	329	21004	134	103	92	0	84	535	305	4156	0	822	66	0	0	102	94	140	312	0	148	21560	6773	0.327
42	5852	42900	1.4	19	181	0	9	745	219	1328	36686	795	21	90	322	20455	135	144	133	0	43	569	298	4253	30	668	64	11	0	59	119	206	387	15	32	21477	6918	0.325
42.2	5868.6	44607	1.4	40	227	0	14	718	173	1357	39684	849	14	35	344	22065	180	225	122	34	108	540	279	4387	0	819	0	25	0	79	104	52	405	0	152	21839	6804	0.328
42.4	5885.2	43647	1.45	35	172	0	0	696	178	1369	40100	926	0	80	366	21934	217	145	68	0	54	580	230	4192	12	663	27	45	34	20	65	68	310	0	0	21300	6793	0.320
42.6	5901.8	43806	1.38	37	218	0	13	656	179	1406	40957	784	12	71	339	22430	154	70	83	0	41	455	250	4371	0	799	55	5	0	63	0	181	425	19	65	21049	6821	0.323
42.8	5918.4	43923	1.41	31	224	0	13	634	189	1357	41800	839	62	0	331	22353	160	61	148	0	81	443	260	4215	0	645	86	0	9	96	57	0	342	16	188	20614	6583	0.325
43	5935	44352	1.45	28	192	0	0	643	145	1388	39668	732	78	54	284	24362	206	71	86	0	29	384	311	4293	0	689	39	18	0	139	40	156	427	25	35	21346	6675	0.325
43.2	5951.6	44071	1.39	45	217	0	0	668	184	1380	39684	785	8	65	339	23614	137	22	106	0	147	465	227	4051	0	568	34	38	15	124	83	79	428	8	193	21860	6969	0.323
43.4	5968.2	43702	1.3	31	149	0	0	692	177	1480	39980	789	0	46	276	22548	98	26	73	0	53	448	254	4035	30	733	62	0	0	35	0	0	376	27	0	21428	7090	0.321
43.6	5984.8	43868	1.49	16	214	0	0	631	176	1410	39658	957	29	11	276	22612	150	18	66	0	0	461	251	4185	0	860	0	53	0	65	138	79	401	0	13	21225	6795	0.324
43.8	6001.4	43804	1.44	36	234	0	4	673	231	1403	39318	890	28	25	275	22432	164	53	104	0	113	538	280	4199	60	679	0	49	0	71	111	140	371	0	42	21805	6869	0.323
44	6018	44222	1.47	46	208	0	22	659	206	1485	39767	920	19	68	286	22970	127	47	70	6	9	467	178	4139	0	667	25	12	0	69	77	211	302	0	85	21333	6885	0.328
44.2	6034.6	44629	1.43	33	200	0	0	683	181	1386	38661	808	57	40	281	25123	107	0	71	0	0	507	318	4025	0	784	47	12	0	65	66	237	429	0	112	21939	7003	0.325
44.4	6051.2	44620	1.49	12	178	0	9	724	159	1363	36243	914	19	35	407	27839	116	35	111	17	92	521	286	3685	0	825	0	6	0	84	97	142	463	0	222	21665	6871	0.321
44.6	6067.8	43933	1.39	26	178	0	4	729	156	1247	37077	906	40	28	366	25186	111	102	126	0	70	530	237	3761	0	717	0	45	0	22	74	124	428	0	52	21090	6842	0.325
44.8	6084.4	43423	1.41	41	204	0	28	708	201	1334	38405	812	18	35	338	23408	130	65	70	0	62	489	330	4096	0	779	27	37	8	89	76	144	434	0	93	20850	6891	0.323
45	6101	44190	1.4	34	176	0	11	719	190	1468	39330	817	50	19	306	23372	152	156	122	34	120	501	220	4158	0	748	48	0	0	135	88	102	342	0	129	21044	6843	0.325
45.2	6117.6	44580	1.47	21	223	0	13	715	193	1396	37881	808	48	56	352	24234	122	103	97	0	128	553	324	4240	0	884	57	9	0	111	130	243	379	0	19	21425	6855	0.325
45.4	6134.2	44110	1.45	39	202	0	0	719	201	1325	39551	859	38	44	300	23156	140	162	90	0	87	501	316	4164	0	803	8	10	0	78	44	187	410	0	98	21448	6787	0.323
45.6	6150.8	44152	1.4	46	188	0	0	688	230	1363	37773	884	12	49	394	24802	164	69	127	0	28	391	297	3881	0	748	0	24	28	67	80	172	422	14	88	21151	6849	0.323
45.8	6167.4	43676	1.29	46	196	0	0	704	181	1391	38468	860	8	90	283	23605	121	55	101	26	10	526	327	4090	0	695	76	0	0	138	79	181	412	0	157	20861	7135	0.322
46	6184	44250	1.35	34	216	0	9	663	199	1375	37709	815	70	65	285	26054	133	99	78	0	78	487	279	3971	0	668	60	6	0	80	66	122	385	0	37	21322	7012	0.323
46.2	6200.6	44279	1.34	31	179	0	33	773	156	1271	36816	769	34	91	290	27003	140	28	75	0	27	402	295	3834	16	741	58	0	5	59	18	241	458	12	106	21150	6590	0.324
46.4	6217.2	44395	1.37	35	180	0	0	748	200	1415	37741	787	26	39	328	26198	143	148	106	0	83	473	342	4073	0	638	51	10	0	37	11	217	379	9	116	21242	6809	0.325
46.6	6233.8	44602	1.39	19	220	0	0	710	187	1492	40928	875	13	52	268	23292	161	67	126	0	52	476	192	4305	0	773	50	0	0	78	0	202	448	0	8	21304	6962	0.325
46.8	6250.4	44480	1.46	11	195	0	22	726	176	1444	39503	979	25	52	283	23551	185	123	119	0	109	492	226	4201	26	882	42	31	0	87	77	187	355	0	51	21862	6840	0.323
47	6267	44075	1.38	6	201	0	22	791	174	1309	39007	858	55	17	290	22101	209	145	128	0	66	538	213	4193	0	683	4	15	0	53	37	115	405	0	111	21374	6829	0.323
47.2	6283.6	43635	1.37	53	217	0	4	764	178	1396	39742	945	47	28	325	21841	235	139	107	0	0	431	304	4284	0	703	0	57	0	94	66	189	433	23	40	21450	7038	0.320
47.4	6300.2	43738	1.39	24	205	0	34	725	203	1390	39034	868	61	33	309	21909	128	66	106	0	101	555	367	4285	33	755	0	25	0	62	0	61	384	10	65	21323	7123	0.324
47.6	6316.8	43300	1.4	26	190	0	0	754	169	1380	36944	761	65	40	256	21835	175	65	152	0	186	543	353	4290	36	828	46	20	0	35	114	247	376	0	156	21570	6614	0.321
47.8	6333.4	43422	1.37	0	168	0	0	724	154	1277	37328	761	5	32	263	21544	158	168	104	0	43	473	319	4204	37	836	54	0	0	25	152	116	348	0	0	21516	6832	0.321
48	6350	43513	1.29	49	156	0	7	793	180	1321	36504	820	28	76	277	23661	123	87	41	0	58	415	374	4320	95	720	63	0	0	34	78	22	356	0	100	21182	7022	0.320
48.2	6366.6	43713	1.31	30	184	0	0	790	198	1483	35826	790	53	58	281	24431	142	7	109	0	97	429	282	3987	0	882	0	30	56	38	62	271	404	0	101	21128	7117	0.321
48.4	6383.2	44553	1.43	17	160	0	14	743	188	1291	37691	786	28	27	329	26045	110	0	66	20	71	429	309	3993	17	858	14	20	0	7	10	104	393	0	0	21693	7073	0.324
48.6	6399.8	45562	1.42	35	194	0	17	818	150	1346	35010	895	42	38	338	29223	138	51	69	0	68	477	243	4021	61	769	43	5	0	25	31	138	506	0	12	21924	6906	0.326
48.8	6416.4	44523	1.55	35	178	0	17	874	188	1193	32286	938	30	42	338	29416	155	32	72	0	0	436	346	3751	0	649	15	18	0	54	8	140	484	0	48	21348	6705	0.326
49	6433	43222	1.56	14	172	0	16	786	179	1280	33857	848	0	44	357	25013	126	52	92	21	119	431	279	3895	57	708	49	26	0	57	159	115	458	0	172	20891	6738	0.323
49.2	6449.6	43583	1.33	12	177	0	15	763	179	1399	37564	821	29	69	306	23067	181	39	24	0	32	458	223	3929	0	823	66	7	0	58	60	91	427	0	154	20932	6802	0.326
49.4	6466.2	43427	1.37	0	142	0	0	787	206	1224	35417	775	59	55	263	25173	166	50	28	0	63	461	282	3920	29	927	41	7	17	84	66	142	422	19	95	20969	6817	0.321
49.6	6482.8	43730	1.6	20	211	0	13	786	212	1422	36847	964	52	55	257	23933	145	68	47	0	59	460	262	4141	32	680	0	47	0	20	0	135	436	8	10	20918	6910	0.322
49.8	6499.4	44218	1.3	15	206	0	0	699	203	1522	38811	822	36	59	264	23597	168	28	68	0	39	480	250	4224	68	910	35	19	5	44	34	263	381	0	14	21590	7097	0.321
50	6516	43900	1.51	29	252	0	4	719	198	1466	38010	927	21	48	238	24109	108	48	100	0	16	382	276	4032	0	818	42	20	22	97	59	107	371	5	0	20953	7110	0.320
50.2	6533	43526	1.29	33	227	0	16	721	150	1458	38404	834	24	7	225	23545	195	52	0	10	183	456	261	4135	39	897	22	19	0	119	75	141	361	0	43	21358	7035	0.318
50.4	6550	43901	1.48	19	193	0	8	748	189	1398	40034	923	67	60	256	23096	221	96	105	0	58	405	367	4065	0	843	0	0	0	131	114	172	474	0	97	21417	7049	0.320
50.6	6567	44144	1.44	29	200	0	0	752	208	1397	39016	953	69	8	329	23190	156	0	86	0	108	447	293	4189	0	841	11	13	47	101	126	61	427	0	55	21243	7029	0.320
50.8	6584	43677	1.46	32	187	0	15	812	171	1342	35989	953	51	49	436	23741	169	90	62	11	52	516	323	4090	84	810	32	22	0	60	0	201	489	10	71	21932	7013	0.316
51	6601	44675	1.51	15	173	0	14	840	175	1387	38413	733	65	55	249	23656	125	114	90	5	12	431	367	4238	13	816	42	0	0	87	5	50	403	0	90	21621	6998	0.326
51.2	6617.8	44221	1.41	31	176	0	0	734	210	1361	39385	826	42	71	255	22540	153	204	147	40	54	533	362	4366	0	810	60	0	0	137	145	99	377	10	82	21875	7144	0.320
51.4	6634.6	44060	1.33	44	204	0	31	712	169	1441	39793	853	76	20	262	22054	134	219	75	0	62	508	227	4186	0	795	44	0	8	60	61	151	315	6	44	21917	7085	0.320
51.6	6651.4	44068	1.58	31	229	0	4	731	164	1316	40188	821	44	47	240	23194	106	146	101	0	102	430	286	4079	0	754	47	0	0	71	42	154	366	0	84	20788	7249	0.321
51.8	6668.2	45119	1.49	38	196	0	0	734	206	1406	39521	804	35	61	268	25838	114	111	129	0	83	566	269	4164	73	734	77	0	0	74	57	105	446	0	102	21387	6742	0.325
52	6685	45295	1.42	47	239	0	5	788	170	1363	37140	823	19	80	267	28666	124	0	75	0	77	425	294	3958	0	728	43	0	53	12	67	33	545	0	22	21177	6964	0.323
52.2	6702.4	45548	1.48	43	185	0	0	726	187	1381	38340	774	41	34	300	28329	105	16	47	0	60	512	322	4024	0	651	37	0	0	48	28	157	514	16	65	21592	6949	0.325
52.4	6719.8	44959	1.54	38	153	0	0	767	199	1342	39329	758	35	47	279	27481	184	33	78	0	13	472	308	4269	0	744	35	24	27	75	118	103	465	0	252	21002	6825	0.322
52.6	6737.2	45290	1.31	35	191	0	20	712	180	1431	40555	826	26	63	355	26669	158	10	48	11	13	408	238	4262	0	731	62	0	0	19	0	111	498	0	33	21752	7071	0.321
52.8	6754.6	45372	1.52	24	203	0	6	806	181	1353	36773	740	90	88	279	30124	109	98	67	0	33	494	290	4058	0	589	58	11	0	32	45	201	508	0	143	21228	6765	0.323
53	6772	45183	1.57	22	232	0	0	730	190	1425	37178	917	23	74	295	29001	158	8	38	0	72	545	298	3678	9	931	0	32	0	128	26	161	451	15	172	21236	6818	0.325
53.2	6789.6	43971	1.42	43	208	0	5	691	212	1512	35582	1240	42	49	301	27848	158	34	54	23	49	489	257	3740	0	1014	0	40	14	43	41	215	463	0	99	20356	6917	0.318
53.4	6807.2	44032	1.34	22	271	0	5	678	161	1550	36230	1171	28	38	260	25795	125	40	111	0	58	453	364	3848	0	1062	48	12	45	127	156	121	399	0	110	21378	7241	0.320
53.6	6824.8	44534	1.51	57	253	0	15	676	184	1457	38007	1042	28	71	283	25763	141	19	112	0	98	480	285	4147	0	877	28	34	0	73	89	215	467	18	158	21469	7183	0.320
53.8	6842.4	46122	1.44	38	219	0	13	663	158	1476	42073	880	50	40	272	28299	226	0	101	0	57	449	313	4271	42	776	0	33	77	19	39	258	546	0	161	21500	7052	0.321
54	6860	46935	1.58	37	239	0	27	734	181	1548	40357	867	43	51	458	30693	136	91	119	0	95	512	276	4161	0	615	68	0	0	73	38	149	426	0	75	21845	6989	0.324
54.2	6878.2	47217	1.39	18	166	0	0	789	158	1271	35989	791	7	72	330	33001	187	86	100	0	89	548	331	4074	0	648	67	0	0	48	46	245	532	0	162	22286	6828	0.330
54.4	6896.4	47216	1.72	56	160	0	18	839	208	1430	37274	778	40	72	423	32981	188	109	110	0	83	506	253	4063	0	583	65	17	15	33	84	135	569	0	242	21902	6990	0.326
54.6	6914.6	45957	1.46	32	200	0	4	740	205	1320	38295	834	27	78	404	28828	135	118	70	25	108	484	241	4102	0	682	40	20	0	19	8	177	533	0	51	21803	6943	0.324
54.8	6932.8	45301	1.48	27	205	0	0	721	190	1452	40956	890	59	65	300	25541	137	190	118	19	123	546	293	4259	0	773	36	9	0	17	50	142	438	14	157	21904	7095	0.324
55	6951	45432	1.44	9	250	0	4	664	151	1454	43506	884	61	0	402	24582	184	196	127	0	31	507	237	4385	40	656	0	25	0	88	113	103	465	0	23	22017	7015	0.320
55.2	6969.6	46073	1.49	59	210	0	10	678	179	1554	41921	876	9	64	294	26147	189	78	86	0	31	497	238	4345	0	731	69	0	12	50	93	122	398	36	189	21913	6920	0.325
55.4	6988.2	46066	1.49	36	172	0	4	670	192	1431	43171	843	42	42	293	25501	158	114	116	0	139	573	261	4329	11	683	58	0	0	103	140	229	480	25	86	22038	7104	0.325
55.6	7006.8	45873	1.47	24	209	0	0	733	187	1487	43397	792	71	60	336	25387	137	63	105	0	88	440	241	4359	5	614	77	10	31	28	49	194	445	0	152	21959	7133	0.322
55.8	7025.4	45949	1.43	28	252	0	6	680	168	1449	43195	885	29	41	289	25414	204	71	97	0	6	517	291	4481	0	730	37	24	0	78	56	94	498	0	77	21989	6834	0.325
56	7044	45603	1.48	18	236	0	15	644	177	1527	44048	843	19	63	262	24175	117	104	129	10	16	466	270	4359	0	602	45	14	0	42	115	99	366	0	134	22040	6907	0.324
56.2	7059.2	45659	1.34	28	181	0	0	684	146	1351	43739	810	75	20	352	23803	156	124	115	11	79	492	273	4455	17	658	29	8	0	0	59	79	472	5	114	22425	7004	0.326
56.4	7074.4	46044	1.42	22	200	0	6	666	179	1501	45262	890	9	87	260	23081	113	63	102	0	61	518	320	4447	30	676	0	23	0	71	121	180	424	0	68	21934	6922	0.329
56.6	7089.6	45390	1.32	47	258	0	21	709	197	1500	41857	833	20	60	367	24176	116	56	90	0	15	470	323	4324	0	745	33	0	58	43	122	64	375	12	202	21993	7249	0.324
56.8	7104.8	45238	1.45	15	224	0	0	679	165	1595	42797	1022	39	33	320	23117	158	128	56	0	92	499	262	4413	30	731	0	40	0	40	83	330	418	0	162	21790	7008	0.325
57	7120	45090	1.55	42	216	0	0	684	191	1571	43653	938	11	98	282	22489	185	159	150	39	78	496	285	4460	20	708	67	7	0	101	100	111	326	0	185	21031	6874	0.325
57.2	7131.4	45283	1.49	52	192	0	0	736	197	1506	44547	850	45	61	308	21868	160	96	156	39	103	542	324	4521	0	656	92	0	0	125	116	72	388	38	263	21590	6910	0.326
57.4	7142.8	45478	1.38	42	234	0	0	702	167	1491	43289	898	17	35	269	22399	149	157	127	0	103	477	241	4441	0	697	0	0	0	136	153	164	376	0	76	21475	7133	0.329
57.6	7154.2	45586	1.35	33	197	0	0	721	195	1576	43830	940	59	105	302	21865	198	102	50	0	179	521	403	4434	0	759	13	0	22	81	21	194	368	32	157	21767	6986	0.330
57.8	7165.6	45215	1.48	25	207	0	20	760	194	1486	43044	808	42	50	846	21520	169	211	148	0	0	530	220	4424	51	675	57	0	0	84	56	73	389	0	97	21961	6990	0.327
58	7177	45377	1.4	28	203	0	17	723	189	1412	44281	736	43	54	321	21281	167	223	122	0	123	549	244	4374	61	659	80	0	37	37	110	187	410	24	162	21555	7122	0.329
58.2	7188.6	45065	1.37	36	194	0	18	678	204	1510	43820	806	73	65	299	21378	162	329	97	0	82	530	287	4457	0	698	52	0	0	57	129	128	324	4	156	21833	6823	0.327
58.4	7200.2	45118	1.38	29	201	0	0	658	208	1372	44699	764	40	52	318	21145	172	265	119	0	47	403	254	4438	24	798	61	0	0	0	0	0	439	0	46	21696	6942	0.326
58.6	7211.8	45053	1.41	18	189	0	13	680	183	1418	44330	919	0	65	319	21565	128	130	82	21	157	536	319	4441	29	706	14	7	0	87	51	212	386	7	81	21613	7022	0.325
58.8	7223.4	45369	1.43	26	197	0	0	706	209	1420	45161	863	26	44	287	21290	166	198	152	0	89	596	251	4606	0	851	52	16	0	87	168	157	434	7	62	22150	6966	0.324
59	7235	44927	1.53	42	204	0	18	712	208	1396	43208	736	60	62	358	21667	138	77	98	0	54	482	296	4438	52	714	68	0	58	5	77	80	393	20	0	21920	6951	0.327
59.2	7246.6	44894	1.53	15	152	0	5	708	196	1468	42908	827	67	98	410	22421	192	107	152	0	91	418	234	4442	0	598	53	29	14	160	41	140	429	0	111	21337	7113	0.325
59.4	7258.2	45372	1.45	47	240	0	14	721	215	1442	44925	826	36	55	417	21852	195	75	108	0	117	462	192	4401	0	634	43	5	0	54	81	112	379	0	62	21252	6687	0.331
59.6	7269.8	44693	1.43	23	205	0	18	670	201	1482	45928	883	30	87	337	20898	142	67	55	21	36	395	292	4415	0	735	59	0	0	63	119	74	402	17	72	21134	7110	0.325
59.8	7281.4	44965	1.39	36	236	0	9	647	179	1484	45790	879	62	59	328	21711	137	148	58	0	111	435	272	4403	0	715	51	0	0	122	83	80	359	0	93	21045	6921	0.325
60	7293	44669	1.48	34	212	0	0	620	193	1484	44129	895	0	47	285	22016	177	141	78	0	54	409	227	4282	28	600	0	46	0	18	25	91	375	0	44	21120	6841	0.326
60.2	7304.8	44544	1.48	62	273	0	0	635	199	1520	44047	867	51	44	346	22317	141	147	131	0	129	534	309	4434	49	687	18	12	19	92	99	122	396	0	151	21858	7047	0.320
60.4	7316.6	45646	1.49	42	228	0	5	683	192	1362	43221	843	29	85	287	25195	170	88	92	0	74	448	264	4356	0	673	63	0	10	29	65	165	436	0	90	21490	6889	0.325
60.6	7328.4	45943	1.33	41	234	0	18	739	186	1355	39550	760	11	67	371	28910	186	44	122	0	122	465	286	4203	0	532	48	0	9	0	69	123	449	0	165	21863	7058	0.326
60.8	7340.2	46050	1.42	47	189	0	0	662	171	1356	37463	732	32	75	381	29902	179	88	51	0	32	434	298	4060	0	646	46	0	0	89	139	113	523	0	139	21579	6901	0.330
61	7352	46417	1.48	12	207	0	0	741	211	1349	39513	762	0	112	328	29583	167	79	87	72	111	600	301	4095	0	603	78	0	0	71	78	288	478	15	125	21566	6994	0.324
61.2	7363.6	45632	1.31	35	221	0	0	763	210	1343	41330	879	44	65	330	26258	181	107	129	7	129	422	215	4262	0	587	54	0	0	46	34	59	451	0	212	21990	7034	0.325
61.4	7375.2	44382	1.37	48	186	0	0	644	219	1402	41642	795	8	40	291	23477	198	27	70	12	50	465	222	4139	0	596	18	18	23	59	97	0	386	6	71	21281	6546	0.323
61.6	7386.8	44644	1.33	36	214	0	9	709	177	1500	42439	848	47	84	366	22891	220	24	84	0	55	502	333	4400	0	739	65	0	52	59	125	180	448	0	115	21369	6802	0.326
61.8	7398.4	44853	1.39	16	191	0	9	648	201	1455	42339	798	0	29	431	22833	131	64	52	0	0	500	167	4289	0	760	64	0	39	93	83	82	431	0	187	20903	6680	0.327
62	7410	45088	1.48	47	217	0	0	634	187	1488	42667	843	78	38	332	23045	109	79	109	0	118	531	278	4272	0	663	0	34	0	47	200	50	407	0	79	21582	6964	0.327
62.2	7421.6	44860	1.64	17	264	0	14	702	195	1466	42481	845	50	41	299	22387	177	162	104	0	75	410	227	4310	52	746	33	17	0	69	34	99	462	0	39	21635	7168	0.322
62.4	7433.2	44458	1.53	22	190	0	9	704	186	1424	43214	789	45	72	342	21948	142	60	129	0	69	469	306	4371	0	739	26	18	23	40	80	78	392	0	210	21737	7020	0.321
62.6	7444.8	44796	1.42	33	211	0	0	712	181	1409	42365	831	0	48	340	22409	127	83	77	0	97	490	231	4334	7	682	68	21	0	59	198	33	393	0	190	21616	6894	0.326
62.8	7456.4	44597	1.5	22	235	0	16	637	184	1468	42258	832	39	81	350	22909	153	54	23	0	39	430	272	4388	10	772	18	13	0	86	43	154	367	0	86	21414	6807	0.320
63	7468	45808	1.36	17	242	0	0	725	173	1481	42096	937	0	51	345	24936	188	31	117	0	89	595	313	4457	0	751	24	13	0	67	76	86	323	0	150	22623	6972	0.322
63.2	7479.8	46579	1.42	52	222	0	0	796	172	1473	40047	822	36	57	352	28987	231	31	42	0	28	482	251	4288	0	623	9	25	0	31	31	201	488	18	40	21641	6947	0.325
63.4	7491.6	45877	1.45	15	228	0	20	827	188	1389	37546	863	0	67	316	28071	117	16	52	0	21	507	320	4050	26	669	44	32	0	55	30	139	453	11	99	22136	6852	0.324
63.6	7503.4	45222	1.44	54	152	0	19	763	140	1186	33879	714	64	39	322	29524	175	87	26	0	0	498	238	3748	0	694	15	6	27	93	68	42	456	0	208	21911	6758	0.329
63.8	7515.2	45454	1.46	40	183	0	15	751	222	1369	37566	703	57	58	301	28570	156	211	69	0	75	472	297	4134	0	590	56	0	0	61	95	159	477	17	64	21356	6848	0.325
64	7527	44698	1.39	8	177	0	0	667	177	1417	38841	798	41	83	289	26039	176	254	79	0	116	521	149	4215	0	696	11	22	0	114	49	209	502	0	48	21412	6871	0.322
64.2	7538.8	44895	1.55	12	194	0	0	671	197	1436	41629	816	41	27	311	23765	126	196	101	17	55	506	260	4308	0	630	24	16	0	71	53	245	395	0	49	21968	7040	0.321
64.4	7550.6	45027	1.5	29	235	0	0	740	168	1510	40885	812	28	40	325	25666	187	109	59	0	0	505	312	4256	0	661	56	0	0	106	77	158	416	0	118	21548	6951	0.322
64.6	7562.4	44874	1.47	34	215	0	0	687	164	1425	42554	810	62	49	393	23398	141	134	125	0	43	453	190	4161	0	635	51	5	37	28	90	121	467	0	141	21840	6948	0.321
64.8	7574.2	45257	1.55	38	170	0	0	727	231	1434	42068	724	34	94	340	22874	165	174	133	0	111	531	222	4328	14	789	94	5	0	92	107	195	472	0	92	22312	7016	0.326
65	7586	45093	1.31	7	132	0	0	736	212	1349	41004	775	53	24	343	22609	115	332	173	0	140	532	257	4540	0	577	17	7	0	72	51	96	401	0	94	21699	6973	0.326
65.2	7597.8	44906	1.43	9	186	0	4	750	123	1370	41964	828	15	53	307	21640	236	476	241	0	49	592	159	4501	86	719	37	0	23	34	127	156	457	4	176	21947	6907	0.321
65.4	7609.6	44867	1.34	18	210	0	0	734	163	1401	43420	819	16	65	283	20787	154	572	139	0	62	587	245	4528	8	655	9	28	0	42	92	4	376	0	70	21636	7005	0.324
65.6	7621.4	45018	1.65	40	214	0	0	730	217	1518	43345	860	54	86	272	22385	142	618	197	0	81	674	239	4363	93	748	45	16	0	121	110	130	351	0	107	21589	6949	0.325
65.8	7633.2	45095	1.42	38	234	0	0	650	203	1580	43499	846	52	29	340	23633	178	374	140	0	128	491	308	4466	26	600	27	50	0	56	168	142	527	0	136	21560	7148	0.324
66	7645	45113	1.42	16	198	0	0	708	190	1393	41262	893	47	25	288	26392	147	269	117	0	40	507	234	4368	86	627	29	11	0	64	140	71	390	0	51	21494	6855	0.323
66.2	7657	45091	1.69	35	209	0	7	738	172	1430	40843	789	89	35	289	26238	179	261	101	0	83	522	318	4235	0	642	74	15	0	10	177	154	402	0	95	20978	6943	0.323
66.4	7669	45098	1.39	23	168	0	28	739	182	1427	42297	824	21	37	315	23912	171	170	147	0	33	425	223	4422	0	639	47	17	0	47	88	101	392	43	59	21723	6984	0.322
66.6	7681	45449	1.53	52	250	0	16	713	181	1387	42184	867	7	63	422	24657	252	163	71	0	127	502	187	4364	11	698	9	19	0	64	112	169	447	11	63	21560	6928	0.325
66.8	7693	44738	1.54	44	228	0	0	797	190	1432	42792	816	68	28	350	22887	166	79	88	71	31	412	287	4396	0	550	0	13	0	41	57	147	436	0	158	21313	6911	0.322
67	7705	45089	1.48	40	198	0	5	770	228	1497	43357	898	18	66	290	23374	193	58	107	0	121	465	209	4253	0	732	67	0	0	84	84	121	418	0	109	21285	7047	0.324
67.2	7716.8	45078	1.52	16	222	0	8	691	192	1472	43449	817	23	67	327	24148	153	77	92	0	44	548	209	4446	25	720	88	0	0	63	73	105	375	0	96	21682	7043	0.321
67.4	7728.6	44970	1.54	48	225	0	0	684	190	1538	44371	872	38	78	379	23581	146	87	81	0	30	419	218	4375	0	643	53	0	0	34	67	122	325	0	55	20782	6945	0.320
67.6	7740.4	45096	1.68	20	225	0	26	681	225	1536	43883	937	47	70	322	23101	196	89	81	0	42	445	306	4426	46	676	74	7	0	49	27	173	354	0	12	21560	7007	0.325
67.8	7752.2	44692	1.45	44	206	0	0	702	186	1447	43368	838	29	5	300	22946	151	163	77	0	0	514	274	4388	33	772	52	0	0	84	36	92	408	6	147	21086	6966	0.320
68	7764	43267	1.43	33	190	0	30	784	220	1294	38900	677	18	65	252	21701	159	97	62	0	97	477	262	4027	19	701	125	0	24	134	60	192	375	0	85	21354	6946	0.318
68.2	7776	44795	1.39	30	204	0	13	743	225	1292	40035	753	12	34	264	24167	173	41	118	0	93	582	240	4434	11	703	79	0	0	65	140	68	403	0	116	21485	7043	0.322
68.4	7788	44632	1.74	26	161	0	39	834	208	1313	38364	684	44	41	323	24904	140	38	109	0	106	500	256	4368	45	656	48	31	0	48	85	248	296	0	95	21752	6905	0.323
68.6	7800	44806	1.25	15	188	0	23	760	203	1380	39470	824	15	46	265	25476	163	0	86	0	107	508	214	4380	0	653	46	0	20	64	105	226	444	0	41	21504	6943	0.317
68.8	7812	46892	1.46	20	204	0	0	871	211	1278	35758	839	8	92	410	33497	139	93	24	0	87	601	328	4120	0	738	31	13	0	35	186	13	520	0	118	21899	7010	0.327
69	7824	44918	1.54	31	143	0	31	824	209	1183	31322	728	32	53	326	34581	143	43	24	6	43	534	146	3634	0	556	44	8	0	59	77	160	521	0	100	20861	6602	0.325
69.2	7836.2	45181	1.37	37	171	0	5	769	213	1283	36123	754	34	37	347	29417	131	45	105	0	44	407	212	4040	0	625	8	13	6	80	120	58	446	0	59	21320	6641	0.325
69.4	7848.4	44845	1.51	54	196	0	34	849	188	1334	37295	759	33	59	317	27541	169	120	102	0	73	437	307	4094	0	690	62	0	0	36	44	108	472	18	129	21194	6816	0.323
69.6	7860.6	44159	1.54	12	195	0	0	787	179	1331	39932	815	77	67	267	24331	194	169	147	0	46	485	223	4125	0	732	39	0	0	114	69	16	453	0	0	20861	6801	0.324
69.8	7872.8	43837	1.47	40	178	0	0	784	198	1344	40275	749	25	98	283	22628	179	233	136	0	27	513	223	4337	0	787	28	11	0	79	97	79	450	6	145	20729	6730	0.322
70	7885	44142	1.45	35	204	0	24	735	221	1408	41952	663	29	89	308	21868	143	124	96	0	31	398	277	4345	32	740	112	0	0	52	28	78	373	0	66	21269	6872	0.324
70.2	7897	43846	1.4	21	163	0	11	786	210	1405	41770	753	22	43	300	21661	188	151	102	0	4	516	314	4494	0	645	78	0	0	93	70	120	387	0	28	21177	7019	0.320
70.4	7909	44054	1.35	16	167	0	0	783	210	1363	41522	771	9	87	331	22375	161	86	131	0	12	409	376	4399	0	636	86	7	0	0	101	122	412	12	56	21330	6659	0.321
70.6	7921	43682	1.45	16	154	0	22	805	192	1329	40756	692	65	49	390	22451	198	42	148	0	120	425	326	4414	19	686	49	13	19	77	98	38	415	24	118	21024	7011	0.317
70.8	7933	43970	1.62	29	221	0	0	798	204	1419	41066	809	45	66	327	23008	140	96	68	20	69	392	294	4184	0	652	61	19	0	18	35	145	451	0	250	20953	6944	0.320
71	7945	43963	1.43	28	259	0	16	769	183	1472	40779	803	59	66	334	22821	164	64	92	0	0	474	314	4397	59	670	70	0	0	92	62	86	373	0	115	21258	6756	0.318
71.2	7957	44315	1.36	29	172	0	17	765	192	1385	42189	802	0	58	315	22308	156	32	125	0	64	537	250	4510	19	656	45	0	32	125	27	8	423	0	180	20956	7013	0.322
71.4	7969	43999	1.79	37	179	0	0	744	175	1552	40970	765	48	66	276	22604	155	7	67	8	43	497	239	4457	0	703	66	0	0	74	20	112	387	8	0	21432	6740	0.320
71.6	7981	44435	1.51	29	159	0	20	802	202	1442	41646	771	32	41	343	22825	108	81	55	12	90	497	291	4342	0	628	18	16	0	57	67	158	395	15	90	21340	6896	0.323
71.8	7993	44536	1.43	26	201	0	0	776	201	1372	41236	796	8	0	303	23363	156	57	64	0	0	391	301	4553	0	649	59	35	0	99	90	146	462	0	37	21636	6856	0.320
72	8005	44483	1.46	26	182	0	0	760	251	1392	39705	910	56	48	298	24091	180	0	92	0	0	360	300	4457	0	691	45	5	16	109	47	207	344	0	42	21612	6691	0.319
72.2	8017	44650	1.35	36	196	0	0	771	199	1458	39967	693	36	75	359	24249	134	45	68	45	60	499	267	4363	0	710	87	0	0	75	209	101	413	0	184	21293	6934	0.321
72.4	8029	44437	1.33	39	189	0	0	735	244	1424	41254	806	26	77	343	23196	163	8	111	0	9	435	335	4405	0	755	6	0	0	123	92	189	351	6	114	21710	6947	0.320
72.6	8041	44847	1.4	33	205	0	0	701	207	1441	41030	844	25	21	230	24683	193	25	117	0	64	425	334	4301	11	683	4	4	0	39	42	193	396	7	92	21861	7186	0.319
72.8	8053	45044	1.37	0	166	0	17	737	202	1308	39633	793	0	37	345	26065	111	5	71	0	51	491	310	4282	0	706	38	13	0	63	11	158	365	0	89	21464	6809	0.321
73	8065	45247	1.47	45	162	0	0	820	208	1354	37611	773	50	41	396	28836	119	67	33	5	0	440	267	4077	0	677	21	46	0	8	41	67	460	34	28	21046	6801	0.322
73.2	8077	44830	1.37	0	175	0	0	814	182	1451	38196	777	21	50	318	25886	173	75	69	0	96	492	298	4309	0	630	61	9	0	37	121	227	426	0	113	21573	6896	0.321
73.4	8089	44459	1.49	32	209	0	21	690	197	1514	41871	735	48	71	285	23898	201	124	154	39	47	529	225	4390	0	684	74	0	0	91	29	177	337	28	120	21367	6992	0.320
73.6	8101	44602	1.39	13	228	0	0	642	191	1487	43207	904	45	29	282	23005	169	129	74	29	54	438	285	4371	0	711	20	11	0	99	66	169	398	15	21	21356	6968	0.322
73.8	8113	44724	1.6	31	239	0	0	665	241	1606	43112	927	40	71	292	23614	133	137	130	17	130	482	247	4369	16	758	50	19	0	23	47	249	402	7	249	21012	6689	0.323
74	8125	44533	1.46	35	216	0	0	621	184	1485	43305	818	23	38	233	23054	101	124	99	0	50	482	325	4484	94	702	94	0	0	0	16	173	319	0	172	21097	6829	0.321
74.2	8137	44633	1.45	20	184	0	0	638	183	1586	43406	953	19	70	338	23025	143	115	105	0	0	515	273	4422	16	694	45	6	17	113	29	148	421	43	9	21246	6931	0.321
74.4	8149	45108	1.45	32	255	0	0	599	165	1547	43508	863	51	33	308	25055	155	6	110	0	54	474	309	4463	0	705	29	8	18	73	145	132	436	0	58	21299	6892	0.321
74.6	8161	45628	1.43	55	252	0	0	643	213	1623	43711	872	0	67	342	27134	177	73	77	0	110	399	320	4336	0	762	34	30	0	107	73	169	427	0	133	21235	6900	0.317
74.8	8173	46135	1.4	47	238	0	8	775	176	1380	38326	755	73	33	379	30599	162	54	74	6	46	455	245	4088	32	752	44	0	0	58	26	173	428	0	188	21517	7052	0.325
75	8185	45359	1.44	21	172	0	0	717	202	1475	40656	895	20	36	344	27606	172	20	82	0	73	438	355	4291	81	741	5	14	0	57	119	253	417	0	178	21536	6806	0.322
75.2	8197	46886	1.4	32	221	0	5	817	205	1522	38160	840	66	32	405	32205	156	53	68	80	73	572	277	4070	25	703	60	0	0	34	44	186	547	0	143	21746	6883	0.327
75.4	8209	45790	1.4	54	191	0	0	790	208	1318	34712	788	59	56	399	33208	140	78	63	10	82	543	268	3944	22	690	73	0	0	80	39	75	527	21	163	21352	6686	0.323
75.6	8221	45127	1.65	30	182	0	0	746	222	1382	37862	759	56	53	399	29705	188	154	108	22	67	410	282	4024	0	684	29	37	0	71	119	214	510	0	36	21371	6948	0.323
75.8	8233	44937	1.73	27	207	0	0	635	200	1522	41529	786	25	51	298	25484	201	148	109	0	68	480	309	4379	0	642	28	44	0	41	20	189	376	0	196	20852	6854	0.326
76	8245	44929	1.55	39	226	0	0	678	159	1492	42008	935	22	68	377	24994	155	142	115	12	91	431	310	4585	20	566	6	34	0	85	88	0	464	0	116	21137	6915	0.321
76.2	8257	45603	1.43	38	196	0	12	692	195	1598	41740	890	12	68	385	26180	143	32	95	0	103	529	331	4384	0	688	53	6	0	24	139	165	462	9	77	21824	7274	0.323
76.4	8269	45859	1.43	39	208	0	10	678	203	1441	40515	859	49	49	359	27682	159	48	160	0	28	465	248	4258	24	660	59	0	46	44	115	220	407	0	163	21609	7131	0.323
76.6	8281	45551	1.51	35	177	0	0	692	212	1389	39731	783	88	19	335	27913	187	33	112	0	137	428	284	4042	0	615	26	0	0	25	124	0	368	6	81	21264	6773	0.324
76.8	8293	45046	1.43	27	224	0	5	677	202	1558	42323	837	12	95	329	26662	187	48	124	0	57	470	305	4374	70	747	92	0	0	61	168	137	417	5	6	21537	7055	0.317
77	8305	44968	1.5	22	254	0	0	593	198	1516	41814	854	43	40	429	25854	164	50	128	0	71	445	260	4325	0	626	30	11	0	23	152	132	522	0	20	21111	6848	0.321
77.2	8317	44725	1.46	38	212	0	5	647	218	1505	41347	809	56	37	403	25309	148	0	98	0	8	458	360	4495	58	777	70	0	8	0	0	281	400	0	85	21192	6843	0.319
77.4	8329	44895	1.39	48	199	0	17	697	218	1555	40809	898	0	73	379	25377	158	78	84	0	0	473	292	4229	0	719	12	27	0	35	46	239	398	0	47	21244	6872	0.323
77.6	8341	44923	1.37	16	227	0	0	666	219	1531	41358	899	16	70	361	25153	145	70	85	0	0	509	361	4453	0	720	0	33	0	77	96	168	426	6	96	21570	6863	0.321
77.8	8353	45066	1.36	42	228	0	15	689	197	1625	41199	908	17	37	353	25869	180	60	99	0	0	398	284	4209	37	697	54	0	0	98	64	46	445	0	0	21149	6964	0.320
78	8365	45178	1.33	48	244	0	0	720	215	1594	41211	894	64	83	376	26379	190	77	78	0	16	361	233	4333	13	615	75	0	0	58	96	116	493	22	113	20905	7022	0.322
78.2	8376.8	45187	1.33	28	261	0	0	665	207	1574	41276	976	12	92	282	26677	128	53	63	0	77	494	198	4345	0	632	75	0	0	49	111	190	462	0	39	21511	7062	0.318
78.4	8388.6	45167	1.39	0	214	0	0	725	196	1544	38357	919	20	66	354	27596	154	85	81	6	166	529	400	4164	0	665	43	0	0	125	139	175	429	0	158	20851	6727	0.321
78.6	8400.4	45378	1.51	49	199	0	0	761	206	1438	36603	845	10	62	256	30401	122	69	102	0	72	448	267	4185	59	710	25	0	0	16	64	169	461	0	170	21682	6808	0.320
78.8	8412.2	45265	1.47	32	225	0	6	649	216	1492	38046	806	14	71	373	29074	195	16	127	20	82	445	337	4165	0	739	52	18	0	97	161	78	490	0	143	21645	6854	0.320
79	8424	45536	1.42	23	230	0	0	655	197	1468	39255	862	6	27	323	28474	162	0	105	0	73	484	215	4002	0	626	45	18	34	46	196	58	474	0	29	21161	6854	0.324
79.2	8435.6	45519	1.44	18	262	0	9	640	208	1527	39207	894	20	39	329	28401	150	87	92	31	107	482	332	4099	0	678	27	8	0	54	191	106	403	0	158	21384	6938	0.324
79.4	8447.2	45441	1.54	38	264	0	0	625	198	1574	40051	874	40	91	352	27943	179	44	97	0	57	574	354	3981	4	607	43	0	16	41	102	250	471	0	152	21057	6954	0.326
79.6	8458.8	45182	1.54	49	290	0	40	620	201	1572	40185	857	21	91	368	27072	198	68	105	40	0	608	360	4191	0	776	82	0	0	71	128	122	501	26	102	21334	7081	0.323
79.8	8470.4	45192	1.52	75	231	0	0	575	211	1568	41681	964	22	52	422	26803	191	66	159	0	57	492	292	4218	0	689	0	46	0	100	131	24	506	0	173	21171	6779	0.320
80	8482	45114	1.34	20	233	0	4	654	196	1638	40119	960	61	78	326	27930	139	41	137	0	62	552	338	4246	37	747	43	0	38	13	93	100	396	0	233	21054	6863	0.321
80.2	8493.8	44907	1.44	33	266	0	9	676	190	1530	40026	908	31	75	307	28196	168	126	126	44	112	488	336	4326	0	820	42	6	0	68	99	199	442	0	100	21361	6856	0.319
80.4	8505.6	45083	1.4	15	213	0	16	664	181	1572	39772	970	20	46	389	28838	176	0	164	0	0	454	378	4156	27	740	75	15	15	52	129	181	537	0	71	20706	6775	0.320
80.6	8517.4	45813	1.31	34	235	0	0	695	210	1550	39814	912	9	53	352	28304	217	87	81	0	96	509	340	4224	32	702	0	43	0	110	113	136	423	0	9	21263	6769	0.327
80.8	8529.2	45692	1.37	30	248	0	0	672	215	1531	38672	943	51	41	313	29177	173	41	93	0	125	502	278	3981	0	653	0	42	0	61	26	39	501	5	142	21725	6695	0.325
81	8541	46225	1.37	25	213	0	0	696	182	1534	38686	945	65	32	413	30586	196	25	92	0	77	475	361	4088	0	563	39	37	19	79	60	118	470	0	123	21767	6770	0.324
81.2	8552.8	46472	1.43	43	235	0	10	743	166	1568	37095	938	48	49	320	31642	162	49	183	0	80	505	263	3957	0	572	37	0	0	127	50	184	409	11	129	21847	6926	0.325
81.4	8564.6	45376	1.43	32	211	0	0	642	209	1565	39623	883	36	59	312	27913	130	88	121	0	84	481	298	3997	0	724	67	0	0	113	82	203	499	0	49	21360	6794	0.325
81.6	8576.4	44963	1.48	58	219	0	12	692	207	1472	40619	885	30	75	373	25561	174	59	70	0	113	493	207	4259	11	666	49	6	0	67	82	225	459	0	70	21483	6865	0.325
81.8	8588.2	44628	1.52	53	216	0	22	644	219	1577	41393	847	29	34	357	24769	170	73	95	13	0	448	276	4112	0	716	45	17	0	79	117	124	405	19	70	21374	7030	0.323
82	8600	45170	1.44	19	220	0	14	694	209	1519	41643	878	51	83	345	24542	152	136	117	0	37	499	241	4220	17	772	37	15	0	30	84	0	450	8	157	21481	7083	0.325
82.2	8611.4	45306	1.43	23	221	0	0	715	165	1467	39950	837	19	61	314	25701	115	95	52	0	58	534	301	4395	46	777	28	27	0	0	60	117	439	0	84	21773	6699	0.326
82.4	8622.8	44778	1.32	40	212	0	0	669	230	1453	40112	864	31	33	327	24674	172	201	127	0	13	516	277	4135	0	590	25	18	0	120	27	104	493	8	44	21254	6800	0.325
82.6	8634.2	44771	1.44	52	191	0	0	644	181	1513	40842	733	61	101	376	24161	200	170	139	27	81	535	207	4160	0	734	100	0	0	87	15	104	429	0	105	21058	6735	0.327
82.8	8645.6	44522	1.5	43	203	0	21	690	190	1434	40608	831	62	51	294	22723	122	144	48	0	104	500	278	4172	33	609	34	26	0	80	148	0	398	0	92	21446	6908	0.328
83	8657	44599	1.34	40	177	0	20	722	240	1452	38689	883	30	81	360	23958	155	82	109	0	34	528	285	4222	38	658	53	0	0	77	84	218	471	12	114	21314	6787	0.329
83.2	8668.6	44393	1.56	19	199	0	24	698	247	1453	38297	889	0	56	378	24592	135	60	100	0	61	530	331	4182	0	583	31	0	51	68	213	85	339	0	103	21265	6518	0.328
83.4	8680.2	43939	1.65	42	199	0	0	673	217	1433	37828	852	28	65	308	24305	164	23	41	0	62	374	255	4063	0	667	75	0	22	39	139	115	432	40	62	21330	6686	0.326
83.6	8691.8	43805	1.41	26	178	0	14	593	261	1481	38432	841	77	26	353	23860	133	46	160	0	130	449	277	4051	11	647	0	22	0	27	149	76	402	0	9	20604	6670	0.328
83.8	8703.4	43589	1.27	36	193	0	0	638	212	1425	38256	782	0	68	340	23333	177	42	74	25	121	482	289	4022	0	649	55	5	0	100	40	183	303	0	129	21093	6474	0.328
84	8715	43383	1.62	0	188	0	0	692	203	1383	37725	804	0	63	392	23461	181	99	301	0	131	491	372	4037	0	639	52	12	4	100	163	183	424	0	71	20878	6426	0.324
84.2	8726.4	43635	1.46	8	207	0	0	638	217	1481	36149	862	24	36	353	24496	164	128	179	0	39	479	307	4037	0	743	7	50	0	130	76	0	416	0	50	20902	6767	0.328
84.4	8737.8	43543	1.43	42	222	0	5	712	201	1490	36937	808	30	48	293	24305	126	91	38	0	91	465	261	4082	80	698	37	9	0	64	31	177	326	0	22	21440	6799	0.324
84.6	8749.2	43449	1.43	0	123	0	0	647	198	1351	37670	673	49	77	319	23347	176	272	100	14	57	479	413	4170	0	635	65	0	0	0	102	108	436	14	6	20639	6658	0.328
84.8	8760.6	43503	1.4	0	204	0	19	703	173	1488	39714	831	23	80	271	22628	178	290	115	0	46	469	225	4182	0	673	0	44	0	66	76	139	390	0	106	21206	6574	0.325
85	8772	43071	1.47	34	204	0	12	641	235	1373	38555	854	28	73	288	23362	123	158	89	0	11	411	256	4157	0	573	18	7	0	104	154	96	432	5	0	20805	6545	0.322
85.2	8783.4	43494	1.41	46	186	0	0	694	179	1405	37677	917	23	45	391	24278	149	100	96	0	94	452	247	4208	0	621	0	11	0	101	117	134	421	0	115	20893	6625	0.324
85.4	8794.8	44077	1.41	17	206	0	14	669	185	1548	37526	886	23	71	355	25711	143	62	128	0	70	462	229	4108	0	766	11	32	0	53	175	177	440	0	67	21135	6829	0.324
85.6	8806.2	44213	1.71	33	240	0	9	646	225	1592	37883	814	53	44	332	25849	119	21	56	10	37	543	292	4088	37	663	77	0	0	0	59	110	443	0	121	21199	6725	0.323
85.8	8817.6	45528	1.43	16	208	0	26	712	188	1516	38152	870	38	75	371	28081	164	0	78	0	51	470	357	4241	0	715	69	0	8	5	84	179	415	0	50	21542	6913	0.324
86	8829	46751	1.52	41	205	0	31	807	189	1559	36705	858	44	68	377	31332	127	44	90	0	117	537	271	4003	20	642	62	0	0	83	100	101	478	0	57	22239	6954	0.324
86.2	8840.2	45913	1.46	12	207	0	0	910	213	1244	33117	859	37	49	353	31373	122	84	77	0	99	595	295	3779	0	594	20	22	0	33	81	206	466	0	248	21924	6769	0.327
86.4	8851.4	44151	1.33	11	161	0	7	762	168	1263	33669	716	24	51	332	28126	158	0	61	0	99	420	201	3760	0	697	54	12	0	57	38	35	441	13	88	20974	6967	0.327
86.6	8862.6	44403	1.55	39	203	0	0	647	205	1399	36965	896	23	38	383	25867	116	49	85	14	108	599	304	4161	42	681	28	15	0	46	132	149	447	0	80	21490	6721	0.327
86.8	8873.8	44596	1.44	21	230	0	10	727	164	1414	38808	896	13	57	340	26410	140	80	42	0	48	523	290	4161	0	743	28	10	0	69	36	178	406	0	155	21409	6789	0.322
87	8885	45246	1.45	32	195	0	0	724	181	1547	41990	938	24	24	359	25902	198	85	98	34	152	455	262	4388	33	614	0	44	0	82	104	118	476	0	71	21297	6671	0.318
87.2	8896	44766	1.56	54	190	0	22	723	209	1485	40912	761	12	63	368	25113	106	24	94	0	136	432	326	4204	58	665	26	26	32	22	120	62	414	9	109	21490	6876	0.322
87.4	8907	44795	1.43	9	222	0	12	693	212	1488	40832	883	27	90	335	24951	149	77	101	52	94	534	335	4458	0	602	33	8	0	67	50	183	474	6	123	21213	6853	0.324
87.6	8918	44840	1.48	0	223	0	15	691	223	1447	41335	833	0	87	359	24455	156	42	85	0	72	473	340	4350	0	731	39	18	0	93	106	99	431	0	66	21534	7060	0.326
87.8	8929	44884	1.46	37	189	0	0	688	188	1477	40585	853	27	63	351	25521	170	111	95	0	116	467	305	4289	0	727	15	17	0	114	74	343	396	0	65	20783	6763	0.326
88	8940	44293	1.44	17	181	0	0	589	207	1525	41840	845	35	62	294	23405	139	139	63	0	6	469	211	4375	4	721	48	0	48	114	58	121	336	8	103	21030	6898	0.324
88.2	8951	44878	1.51	0	200	0	6	721	237	1513	42196	884	26	64	344	23962	186	242	141	0	77	517	300	4342	0	787	56	13	19	47	105	154	397	0	61	21304	6932	0.322
88.4	8962	45434	1.38	23	220	0	10	700	192	1486	41277	895	99	84	334	25506	211	133	104	0	19	527	328	4366	42	637	43	0	0	115	55	284	454	0	144	22187	7046	0.322
88.6	8973	45137	1.4	33	217	0	18	786	203	1456	37831	850	50	46	330	28098	115	77	72	0	89	538	274	4116	0	702	39	7	0	53	72	222	473	0	132	21661	6754	0.320
88.8	8984	45869	1.55	33	184	0	0	746	190	1480	37363	853	24	77	378	29913	165	74	67	0	27	484	334	3946	0	678	78	0	0	68	43	201	499	0	162	21906	6928	0.324
89	8995	45837	1.49	22	199	0	24	781	164	1522	33620	785	52	107	375	31934	151	90	108	0	88	513	254	3714	0	610	84	0	0	71	111	180	499	0	137	21346	6765	0.326
89.2	9005.8	44887	1.45	23	222	0	8	665	194	1534	37972	894	28	43	364	26472	199	101	115	10	95	550	317	4174	51	766	8	29	0	28	67	134	477	0	48	21682	6749	0.325
89.4	9016.6	44802	1.48	42	192	0	0	718	208	1455	39285	816	39	40	328	25568	200	180	81	0	110	552	340	4244	0	678	67	12	0	50	135	82	432	0	46	21487	7044	0.326
89.6	9027.4	45343	1.47	0	153	0	0	683	223	1469	40054	820	51	53	260	27475	170	57	121	0	57	511	282	4183	0	674	33	21	7	81	178	128	500	0	80	21109	6950	0.327
89.8	9038.2	44751	1.47	32	185	0	0	725	179	1361	39833	818	35	36	334	25455	144	115	77	0	72	418	225	4081	22	682	26	12	0	55	58	111	498	0	0	21218	6825	0.325
90	9049	44509	1.39	22	193	0	0	700	202	1392	39661	796	16	66	308	25897	166	105	104	0	118	473	295	4137	17	672	37	14	9	50	85	72	451	0	130	21340	6888	0.320
90.2	9060	44606	1.29	48	204	0	0	631	196	1367	43206	837	45	61	313	23115	111	95	38	0	65	501	282	4363	42	735	40	15	17	7	55	117	387	14	78	21379	6881	0.324
90.4	9071	44559	1.47	9	198	0	0	690	212	1507	44824	869	44	64	366	22347	197	137	106	6	69	587	149	4358	0	688	0	43	25	107	41	96	376	0	129	20779	6883	0.324
90.6	9082	44753	1.46	43	221	0	0	679	171	1515	45033	751	43	34	337	22564	169	124	104	0	51	524	330	4567	0	671	43	0	0	110	101	134	432	0	198	21014	7037	0.325
90.8	9093	44632	1.34	37	234	0	0	709	222	1473	45182	827	0	53	345	22614	169	155	120	0	48	491	197	4522	0	676	63	0	0	130	29	74	413	7	133	21106	6933	0.319
91	9104	44615	1.44	0	212	0	9	762	189	1421	44451	811	32	82	368	22596	138	36	87	0	80	422	259	4375	47	644	16	35	41	74	120	94	367	0	143	21515	6821	0.320
91.2	9114.6	44519	1.38	54	211	0	8	730	203	1412	41690	735	62	45	297	22726	195	104	130	0	29	510	225	4515	92	707	36	12	0	20	30	173	453	0	0	21281	6668	0.321
91.4	9125.2	44812	1.58	39	193	0	33	815	158	1405	42637	762	37	58	330	22648	130	92	100	16	123	465	329	4438	10	700	62	12	0	138	88	101	430	0	17	21065	6737	0.326
91.6	9135.8	44077	1.41	24	214	0	19	714	183	1358	43671	733	17	72	301	21403	161	65	57	0	58	418	253	4394	0	678	43	24	32	94	31	79	474	0	68	20741	6785	0.323
91.8	9146.4	44112	1.45	37	192	0	13	672	180	1351	43089	790	23	60	294	21537	187	193	105	18	48	496	242	4588	0	701	65	0	0	110	0	0	415	0	9	21113	6956	0.322
92	9157	44298	1.38	52	233	0	8	735	195	1415	43259	877	24	81	303	21562	134	215	27	0	83	481	323	4545	0	813	46	0	0	120	58	119	316	0	120	20772	7026	0.324
92.2	9167.6	43928	1.4	27	184	0	0	650	230	1471	44235	885	26	33	340	21078	181	85	131	25	38	470	314	4646	0	758	9	42	12	127	99	23	403	0	85	20606	7009	0.326
92.4	9178.2	43978	1.49	35	206	0	0	658	213	1440	44200	688	63	59	364	20858	174	80	140	0	41	386	329	4632	0	690	80	0	0	87	118	4	326	5	43	20911	6962	0.322
92.6	9188.8	44133	1.71	31	178	0	0	699	193	1490	45803	832	19	35	370	21026	135	23	80	0	24	529	281	4731	50	740	44	18	18	0	39	297	313	0	96	21188	7165	0.321
92.8	9199.4	44391	1.47	44	233	0	19	651	189	1432	45104	786	0	58	357	21114	155	68	97	0	56	445	287	4486	0	672	71	0	0	81	19	173	356	0	152	20976	7060	0.324
93	9210	44112	1.39	15	194	0	0	726	222	1433	44613	842	31	18	401	21301	133	40	60	0	141	502	313	4725	0	722	22	10	44	103	81	126	368	0	123	20667	6723	0.321
93.2	9220.6	44362	1.41	14	206	0	0	740	192	1448	43650	773	81	15	324	22318	164	69	74	0	97	476	262	4549	13	687	41	17	32	47	49	43	352	0	86	20911	6743	0.323
93.4	9231.2	43881	1.45	44	227	0	11	690	185	1453	44506	828	27	21	421	21555	169	122	139	0	172	473	312	4465	0	745	0	21	0	95	125	33	388	12	37	20665	6691	0.318
93.6	9241.8	43836	1.45	11	184	0	16	737	185	1408	44183	802	45	38	342	21335	192	16	114	9	14	433	221	4518	0	708	29	24	0	78	107	59	392	14	143	20908	6820	0.319
93.8	9252.4	44040	1.62	31	210	0	14	756	232	1441	44075	769	0	62	358	21565	99	50	73	0	64	463	264	4541	51	704	43	36	0	38	90	124	385	0	148	21269	6875	0.322
94	9263	44244	1.38	47	253	0	18	724	233	1466	44297	819	0	41	365	21924	179	47	99	0	42	432	289	4739	0	720	63	0	53	91	120	181	382	13	96	20854	6847	0.322
94.2	9273.6	44231	1.33	24	200	0	0	675	189	1437	45259	785	65	47	483	22000	158	84	166	11	96	492	294	4707	93	774	47	8	0	104	150	215	438	0	165	20780	6764	0.320
94.4	9284.2	44659	1.38	50	218	0	0	680	252	1541	45392	774	21	59	319	21952	151	103	84	0	53	464	323	4551	0	759	69	0	0	58	136	44	418	0	9	20745	6946	0.323
94.6	9294.8	44048	1.51	18	202	0	0	689	212	1439	44449	884	24	51	275	21699	135	47	96	0	77	403	350	4566	0	594	54	0	0	26	69	165	356	0	46	20841	6912	0.319
94.8	9305.4	44335	1.41	46	202	0	7	660	202	1447	46323	827	30	29	346	21844	191	125	84	0	36	522	272	4686	0	768	56	0	0	99	198	17	428	8	124	20748	6750	0.319
95	9316	44082	1.42	64	222	0	28	690	225	1401	45984	765	32	44	390	21641	173	239	105	0	98	350	252	4603	0	642	42	0	0	68	88	147	342	18	95	20658	6886	0.319
95.2	9326.6	43172	1.42	19	192	0	0	690	180	1384	43808	772	26	32	349	20114	155	153	68	0	18	437	211	4629	0	785	66	0	0	126	146	44	422	0	110	20693	6747	0.320
95.4	9337.2	43990	1.34	12	188	0	0	664	203	1377	45566	808	46	48	435	20912	187	135	102	0	29	376	271	4690	49	635	21	32	0	23	33	75	383	0	49	20662	6834	0.321
95.6	9347.8	43835	1.39	37	196	0	0	739	182	1381	45153	817	27	73	382	21155	163	31	135	0	49	395	255	4644	0	761	54	0	0	83	91	237	410	0	72	20684	6807	0.320
95.8	9358.4	44599	1.51	12	241	0	22	670	207	1495	45116	757	5	61	416	23042	129	35	40	0	76	484	255	4654	32	719	96	0	0	74	86	198	376	9	150	21023	6791	0.320
96	9369	47010	1.4	27	190	0	165	756	179	1316	41208	755	37	22	291	38935	208	72	98	0	70	436	352	4362	0	591	36	0	0	0	166	208	519	0	181	19784	6679	0.322
96.2	9379.4	44585	1.45	39	235	0	20	746	199	1463	43168	778	47	57	299	23676	149	37	88	0	104	484	227	4604	0	753	65	7	0	76	117	122	394	0	73	20989	6932	0.321
96.4	9389.8	44331	1.5	0	226	0	10	701	246	1484	43738	718	37	52	328	23416	190	56	97	0	45	435	274	4505	56	669	61	0	0	74	155	95	492	0	134	21120	6753	0.318
96.6	9400.2	44451	1.35	43	223	0	10	714	201	1367	44922	849	28	54	416	22567	196	53	91	0	155	520	225	4467	0	649	0	0	19	61	87	166	371	13	170	20952	6790	0.319
96.8	9410.6	44410	1.46	0	193	0	0	706	182	1405	45103	747	24	53	373	21941	215	29	56	0	38	473	295	4658	0	701	40	0	0	88	112	143	442	0	128	21246	6870	0.318
97	9421	44581	1.38	17	218	0	0	707	163	1357	45072	772	17	35	336	22416	185	122	88	0	115	441	269	4637	97	749	17	21	0	14	28	156	405	0	39	21089	6985	0.319
97.2	9431.6	44445	1.5	33	174	0	0	697	195	1330	44024	769	36	36	342	21905	169	104	54	0	30	560	206	4449	28	769	62	16	0	46	48	67	374	0	70	21183	6782	0.320
97.4	9442.2	44848	1.43	38	196	0	7	736	177	1375	44630	748	38	80	335	22492	202	61	92	0	111	503	232	4523	0	703	63	0	0	131	92	72	402	0	151	21336	7162	0.322
97.6	9452.8	44743	1.31	21	215	0	0	744	208	1352	43468	832	19	81	353	24439	176	38	86	0	88	499	197	4379	48	721	0	28	37	67	28	18	363	0	6	20885	6855	0.321
97.8	9463.4	44405	1.35	36	200	0	0	698	173	1443	42017	868	11	48	354	24661	158	56	73	33	41	459	372	4437	0	683	0	40	0	124	58	150	437	0	11	20929	6886	0.322
98	9474	44541	1.47	24	212	0	0	689	218	1495	44044	759	17	48	304	23274	170	0	85	0	24	502	275	4498	4	670	71	0	53	94	96	189	385	0	142	20866	6817	0.322
98.2	9484.4	44520	1.39	0	189	0	0	731	173	1343	43185	836	30	47	322	23892	173	20	100	0	104	475	197	4582	14	685	11	17	0	56	124	152	371	0	124	21167	6809	0.320
98.4	9494.8	44941	1.39	0	224	0	0	710	214	1404	41849	794	65	23	388	25160	177	16	83	0	70	392	225	4384	24	715	37	0	0	7	49	301	376	15	170	20907	6907	0.323
98.6	9505.2	44522	1.36	75	183	0	6	660	200	1488	43837	789	33	70	400	23339	178	76	109	0	121	552	309	4536	0	753	39	0	35	76	75	142	417	0	91	20867	6759	0.321
98.8	9515.6	44811	1.35	31	228	0	0	707	155	1517	43892	855	42	62	287	23760	172	60	106	0	98	475	335	4764	0	604	27	16	0	108	93	92	394	0	32	21331	7090	0.322
99	9526	45441	1.55	18	206	0	13	757	215	1488	41499	815	38	24	435	27347	123	55	65	5	99	525	214	4495	42	755	53	16	0	57	86	245	432	0	65	21408	6765	0.323
99.2	9536.6	44762	1.35	48	145	0	0	696	202	1279	39916	813	6	0	450	27331	172	38	114	0	109	413	189	4219	0	649	0	55	0	103	72	77	473	15	87	20410	6665	0.326
99.4	9547.2	43790	1.49	39	188	0	0	701	213	1358	40977	765	30	57	368	24523	164	77	99	0	88	450	289	4242	0	713	82	10	7	102	127	190	460	0	90	20744	6534	0.321
99.6	9557.8	44633	1.4	12	245	0	0	697	182	1465	46091	765	20	58	325	22323	156	93	56	0	18	484	252	4623	12	736	60	0	0	19	0	175	349	0	100	20941	6669	0.324
99.8	9568.4	44567	1.37	12	251	0	9	657	185	1462	44826	766	0	63	379	23177	183	121	135	0	81	400	179	4583	94	680	66	0	0	125	122	126	403	0	137	20463	6613	0.324
100	9579	44694	1.37	15	206	0	14	664	182	1510	46039	839	4	33	341	23027	131	225	89	0	80	504	260	4732	0	635	37	17	0	77	80	189	408	29	118	20651	6734	0.323
100.2	9589.4	44418	1.43	48	229	0	0	647	206	1521	47604	881	12	54	331	22509	189	132	118	0	79	469	332	4724	0	552	48	21	0	90	65	109	435	11	186	20991	6914	0.316
100.4	9599.8	44312	1.44	38	246	0	21	630	221	1588	47823	758	64	93	309	21848	195	81	95	0	0	509	314	4935	0	742	61	0	0	66	113	162	443	0	206	20392	6775	0.319
100.6	9610.2	44684	1.44	10	184	0	0	658	198	1511	46232	800	47	65	303	22396	142	90	72	0	0	490	182	4529	0	705	66	0	0	63	95	0	368	42	85	21044	6981	0.320
100.8	9620.6	44728	1.53	8	217	0	38	643	191	1507	46094	901	30	59	334	22467	158	161	30	0	129	562	265	4785	61	747	21	17	0	35	44	88	459	0	96	21003	6847	0.322
101	9631	44797	1.54	50	259	0	0	639	191	1440	47427	819	5	62	362	22315	163	160	125	0	81	497	205	4780	27	788	36	9	31	80	121	0	417	0	91	21174	6907	0.318
101.2	9641.4	45503	1.49	17	155	0	0	733	187	1419	42561	744	27	71	352	28181	159	64	67	0	21	441	290	4444	0	700	75	0	0	82	16	189	398	15	166	21107	6955	0.321
101.4	9651.8	45013	1.37	0	201	0	0	785	195	1290	40205	710	28	50	447	27072	171	95	97	26	110	530	261	4417	0	540	37	19	0	107	31	181	451	0	162	20586	6853	0.328
101.6	9662.2	44648	1.38	29	185	0	11	688	178	1452	43035	827	0	52	404	24571	230	15	98	0	21	433	335	4560	0	653	65	0	13	28	94	202	425	0	151	20973	6830	0.326
101.8	9672.6	44116	1.54	23	201	0	4	642	202	1451	45008	847	46	30	331	22819	126	31	87	0	28	359	254	4553	0	661	30	10	0	76	45	242	342	0	34	20691	6757	0.324
102	9683	44720	1.57	26	203	0	0	650	219	1495	47409	687	28	70	431	22589	186	124	162	0	158	409	237	4764	15	717	108	0	0	58	74	148	325	0	129	20459	6550	0.322
102.2	9693.4	44393	1.52	33	211	0	16	655	169	1508	47795	739	44	56	352	21234	164	152	169	0	90	447	213	4857	0	708	70	0	0	52	75	97	382	0	66	20887	6890	0.322
102.4	9703.8	45512	1.52	12	204	0	0	720	177	1518	49347	800	72	57	394	21777	128	151	153	0	116	542	212	4914	136	680	0	15	0	58	180	199	337	0	54	20695	6989	0.327
102.6	9714.2	44761	1.35	42	222	0	13	686	210	1440	47821	780	34	32	318	21064	161	107	146	0	145	509	239	4785	0	664	42	0	0	102	130	229	382	22	129	20852	6818	0.326
102.8	9724.6	43987	1.38	32	182	0	0	691	189	1393	46878	798	31	43	399	21173	175	169	77	0	0	445	241	4895	0	621	53	0	0	81	139	173	490	0	90	20176	6867	0.321
103	9735	44563	1.62	12	192	0	0	627	222	1496	47785	821	58	31	308	21491	147	145	130	0	85	473	318	4759	41	575	42	8	0	91	116	231	329	0	77	20784	6686	0.326
103.2	9745.4	44523	1.36	17	233	0	0	554	189	1528	47591	860	58	24	447	21769	187	164	94	0	22	414	347	4829	45	842	60	13	0	99	173	50	323	0	0	20474	7097	0.327
103.4	9755.8	44756	1.41	18	219	0	0	619	174	1501	47709	787	24	52	315	22455	123	79	73	12	80	422	234	4763	48	784	60	0	0	43	124	76	383	0	190	20214	6750	0.325
103.6	9766.2	45518	1.53	25	164	0	12	720	204	1470	43883	786	72	67	337	26438	191	35	101	0	65	460	190	4596	11	664	29	5	0	28	55	127	442	0	160	20600	6893	0.328
103.8	9776.6	44327	1.54	50	198	0	11	721	217	1387	40932	795	46	45	315	25538	111	0	55	0	0	477	249	4361	0	743	32	9	0	83	85	146	407	5	15	20248	6539	0.329
104	9787	44164	1.82	36	208	0	0	602	184	1429	42648	783	49	45	390	25005	140	78	30	0	96	397	257	4437	0	643	36	19	0	5	51	149	440	0	45	19797	6597	0.327
104.2	9797.2	44278	1.63	48	234	0	0	600	198	1538	46235	838	47	50	376	21816	141	59	131	0	72	448	268	4666	50	800	32	0	22	26	100	157	330	21	140	20473	6787	0.326
104.4	9807.4	44055	1.4	26	227	0	0	633	209	1487	46458	905	33	96	315	22091	183	112	111	0	80	462	306	4628	0	682	38	14	0	60	85	244	397	0	62	20226	6780	0.319
104.6	9817.6	44386	1.35	31	204	0	10	603	217	1561	45667	814	15	77	368	23079	160	115	93	0	69	486	263	4666	188	686	24	16	0	76	34	344	451	0	115	20116	6803	0.327
104.8	9827.8	44686	1.57	28	219	0	0	665	197	1495	46923	884	0	38	354	22648	109	40	36	0	87	459	297	4545	34	728	57	11	0	78	53	9	306	0	73	20504	6944	0.324
105	9838	45174	1.49	28	239	0	0	674	218	1463	45348	864	44	51	346	25113	164	7	46	0	0	450	290	4616	31	713	58	0	0	93	34	117	361	24	83	20888	6848	0.323
105.2	9848.2	45381	1.52	19	198	0	0	675	221	1385	40683	795	44	40	316	30337	172	70	47	0	98	412	342	4306	0	650	45	0	0	59	57	132	411	0	22	20303	6791	0.326
105.4	9858.4	44738	1.45	50	212	0	0	647	208	1358	41309	802	0	54	341	27490	166	55	58	15	24	393	318	4395	0	685	42	37	0	55	79	0	537	0	115	20207	6448	0.327
105.6	9868.6	44958	1.44	53	213	0	0	736	163	1485	43786	882	37	63	360	25415	199	37	136	0	0	454	168	4578	0	653	0	37	0	23	71	200	483	0	0	20427	6676	0.327
105.8	9878.8	45410	1.48	23	228	0	0	685	175	1498	45189	864	0	58	384	25169	158	63	77	0	141	425	242	4530	0	746	14	36	4	48	48	67	435	17	145	20772	6981	0.325
106	9889	45288	1.5	23	213	0	0	697	192	1468	44416	877	50	37	379	24047	128	69	73	0	36	487	209	4716	0	660	21	7	0	94	102	113	352	0	156	21057	6754	0.326
106.2	9899.4	46331	1.5	18	237	0	0	734	195	1518	45593	805	31	52	352	25419	198	130	104	0	61	503	275	4963	0	600	51	0	4	93	134	51	486	0	58	21633	6987	0.327
106.4	9909.8	44261	1.41	12	189	0	0	705	225	1390	41083	830	55	44	398	25940	170	48	61	0	65	462	219	4255	60	630	37	12	0	0	53	155	473	10	98	20890	6684	0.319
106.6	9920.2	44515	1.38	42	197	0	5	721	185	1355	38612	779	21	29	370	27857	179	137	80	38	84	505	240	4065	0	620	29	9	0	103	79	132	490	0	125	20407	6724	0.324
106.8	9930.6	45350	1.45	31	185	0	0	734	218	1361	38969	709	38	21	320	28783	150	89	88	12	57	513	343	4054	0	731	6	14	0	49	73	178	470	0	177	21127	6622	0.329
107	9941	45724	1.38	52	208	0	0	731	212	1381	39943	742	22	46	320	27391	166	90	120	0	28	413	165	4113	0	738	67	0	0	71	35	190	442	0	25	21043	6677	0.331
107.2	9951.2	44806	1.35	17	186	0	5	749	251	1310	38568	682	21	53	352	26917	155	104	124	0	116	513	214	4254	0	626	54	0	0	79	77	120	385	0	130	21002	6655	0.328
107.4	9961.4	45006	1.37	38	193	0	10	681	181	1340	39432	779	18	46	366	26692	167	145	186	0	19	468	306	4262	23	655	53	0	0	51	83	153	435	0	59	20936	6623	0.329
107.6	9971.6	44015	1.47	39	185	0	26	746	239	1366	39977	773	48	57	367	24752	167	122	115	0	71	451	299	4135	0	535	0	25	0	126	56	22	427	0	53	20630	6468	0.328
107.8	9981.8	43447	1.4	18	161	0	19	653	200	1313	40907	689	23	41	347	22642	144	140	69	13	118	441	175	4273	0	693	30	8	0	111	86	58	436	0	94	21041	6752	0.325
108	9992	43831	1.38	16	204	0	0	637	213	1317	39917	733	14	79	316	25145	186	139	135	0	35	482	248	4057	0	754	59	13	0	0	17	43	501	0	170	20509	6674	0.326
108.2	10002.2	42996	1.6	65	195	0	17	657	255	1347	40601	804	13	29	353	21303	138	152	147	0	185	511	190	4393	0	626	0	10	19	53	158	120	345	0	0	20321	6526	0.327
108.4	10012.4	43088	1.74	15	193	0	0	628	221	1339	41298	773	45	31	309	20257	188	118	167	0	101	517	282	4433	19	757	61	0	0	113	115	63	405	0	125	20276	6576	0.331
108.6	10022.6	42848	1.39	53	204	0	0	616	220	1444	41325	658	44	67	415	21059	157	111	133	42	0	439	196	4225	0	630	84	0	0	94	44	176	382	0	42	20689	6572	0.327
108.8	10032.8	43221	1.38	38	169	0	21	620	233	1365	40826	857	42	16	300	21977	162	138	177	0	56	470	263	4248	0	845	0	28	0	99	90	232	428	0	152	20172	6704	0.331
109	10043	43133	1.41	58	201	0	10	606	251	1383	42540	769	54	59	312	20310	159	107	151	23	81	474	199	4446	0	615	52	0	4	0	163	5	416	0	70	20326	6585	0.330
109.2	10053.4	42785	1.39	16	204	0	0	593	206	1368	43427	855	19	33	313	19918	143	74	117	0	112	427	322	4573	27	601	34	0	0	82	127	123	394	0	200	20439	6614	0.326
109.4	10063.8	43500	1.37	33	248	0	28	697	225	1383	42978	835	9	23	333	20792	157	115	80	4	70	480	211	4601	0	607	8	29	0	58	126	176	380	0	98	20705	6664	0.331
109.6	10074.2	43307	1.4	27	204	0	20	615	237	1430	43316	742	0	91	364	20595	189	88	99	48	122	499	343	4495	69	795	71	0	0	77	42	100	368	0	0	20472	6656	0.327
109.8	10084.6	43691	1.42	22	193	0	0	570	171	1424	42952	792	27	56	370	21304	141	70	92	0	49	482	255	4558	0	614	72	0	0	105	98	124	378	0	88	20476	6744	0.332
110	10095	43776	1.4	50	168	0	9	553	203	1418	43639	859	43	26	328	21065	136	55	33	0	67	383	235	4358	26	690	0	27	0	77	0	118	352	0	78	20574	6864	0.334
110.2	10105.2	43691	1.42	0	185	0	0	636	243	1321	42853	750	42	60	335	21264	169	23	125	0	129	433	259	4307	20	657	67	0	67	8	95	108	355	0	87	20022	6475	0.335
110.4	10115.4	43403	1.35	26	222	0	0	569	167	1363	44390	745	0	33	301	20865	159	88	60	6	37	422	199	4377	0	593	57	8	0	109	0	125	382	0	9	20125	6817	0.327
110.6	10125.6	43981	1.39	13	197	0	0	574	234	1517	42467	822	8	38	336	22694	181	70	101	12	49	371	218	4275	0	686	37	14	0	148	51	201	455	0	78	20337	6686	0.330
110.8	10135.8	44230	1.52	48	237	0	16	633	202	1526	43853	804	49	69	333	23028	167	78	103	0	46	465	295	4339	0	670	40	12	0	81	66	88	437	0	118	20775	6758	0.326
111	10146	44244	1.48	0	208	0	0	656	193	1477	44864	831	33	64	320	22491	193	22	132	0	36	419	277	4393	0	600	34	35	0	17	117	0	481	0	46	20270	6777	0.330
111.2	10156	43813	1.28	30	222	0	15	602	184	1451	45450	837	9	59	266	21827	132	21	137	23	103	435	242	4474	0	674	44	8	0	16	128	160	295	0	154	20431	6752	0.328
111.4	10166	44518	1.84	27	230	0	47	660	203	1499	44681	837	51	32	354	24831	168	44	53	0	0	370	353	4429	0	677	19	32	0	114	31	70	395	0	46	20030	6930	0.327
111.6	10176	44755	1.35	35	213	0	5	605	226	1501	44117	922	68	52	326	24296	192	43	126	30	13	403	274	4419	0	815	43	0	10	23	102	170	547	10	82	20453	7026	0.328
111.8	10186	44930	1.41	0	198	0	0	644	183	1446	43696	879	0	25	325	24871	139	61	70	0	82	463	230	4551	0	663	37	20	0	33	71	130	402	0	113	20830	6612	0.323
112	10196	45571	1.51	10	242	0	33	720	187	1539	42323	891	26	38	315	26097	170	42	62	0	10	419	264	4382	0	752	22	33	0	17	29	186	400	22	33	21150	6804	0.327
112.2	10206.2	45599	1.39	41	221	0	25	745	190	1441	40722	779	0	80	347	28403	152	56	110	0	13	480	241	4268	0	587	63	0	0	82	32	194	480	0	0	21276	6932	0.323
112.4	10216.4	45693	1.43	0	203	0	31	748	220	1399	38434	753	38	89	332	28961	165	0	165	0	57	475	285	4113	0	733	80	0	34	75	128	183	475	0	42	21448	6654	0.328
112.6	10226.6	44633	1.46	27	155	0	0	735	219	1367	37368	768	5	64	349	27441	159	67	62	0	122	547	255	4202	26	614	81	0	21	105	157	153	467	0	83	20795	6730	0.328
112.8	10236.8	45203	1.51	8	211	0	27	679	208	1489	41621	811	27	61	334	25836	186	62	83	0	87	534	238	4299	0	784	81	0	0	119	130	184	453	11	91	20617	7201	0.329
113	10247	45314	1.29	39	232	0	4	667	202	1507	43122	811	23	37	310	24945	169	51	23	0	18	450	161	4613	0	641	61	0	14	81	0	166	412	0	43	20736	7027	0.329
113.2	10257.4	45296	1.44	42	206	0	0	694	210	1447	41768	898	46	68	334	25792	164	73	85	0	122	529	288	4452	70	657	47	0	0	108	62	198	429	5	106	21400	6886	0.330
113.4	10267.8	44531	1.47	0	197	0	27	678	192	1458	42898	818	45	38	331	23865	147	97	65	0	24	441	291	4531	53	722	24	15	0	60	80	135	455	20	63	20701	7015	0.329
113.6	10278.2	44383	1.42	65	239	0	71	702	224	1424	44033	808	58	37	355	23527	138	131	99	0	70	484	285	4474	20	696	20	29	8	11	122	130	446	5	144	20357	6617	0.326
113.8	10288.6	44856	1.44	51	213	0	39	690	166	1448	47421	843	7	57	405	22093	212	163	154	26	55	556	296	4831	112	744	0	42	0	131	157	132	412	0	119	20453	6821	0.326
114	10299	44536	1.37	0	198	0	0	658	194	1347	49359	791	28	21	334	19948	199	0	107	0	55	473	208	4921	81	695	23	36	39	18	135	85	316	0	103	20567	6788	0.325
114.2	10309.2	45017	1.42	22	224	0	44	652	163	1391	49208	704	51	0	308	21899	162	131	94	21	56	477	314	4931	0	617	45	4	0	58	138	5	378	5	100	21093	6888	0.325
114.4	10319.4	44694	1.5	8	212	0	21	721	175	1324	49543	753	30	15	328	20062	194	37	81	0	106	496	360	4881	62	774	18	16	16	35	125	77	351	10	57	20902	6921	0.325
114.6	10329.6	44697	1.52	54	256	0	23	701	219	1521	45970	847	79	33	366	22580	171	147	78	28	91	483	205	4785	0	664	0	21	0	95	28	30	416	0	127	20730	6916	0.322
114.8	10339.8	45046	1.66	27	251	0	20	669	223	1545	45666	855	40	65	392	22959	148	111	106	0	63	493	326	4750	25	679	78	9	0	136	98	249	386	0	100	20909	6884	0.325
115	10350	45010	1.53	56	231	0	8	644	207	1592	45469	757	57	63	371	23578	186	173	120	0	164	501	271	4672	4	620	67	0	0	96	93	187	461	0	108	20588	6957	0.326
115.2	10360.4	45235	1.45	28	230	0	0	650	199	1598	44777	829	29	70	347	24067	193	162	126	0	125	442	191	4553	0	730	49	12	0	73	60	108	462	7	226	20922	6891	0.326
115.4	10370.8	45261	1.34	40	235	0	0	718	200	1451	43975	856	8	67	376	24795	161	42	91	19	69	458	300	4553	0	584	46	0	7	90	122	210	450	0	147	21022	6720	0.324
115.6	10381.2	45030	1.37	36	185	0	0	677	187	1459	44126	911	36	34	451	23635	166	48	27	0	80	494	205	4620	8	645	53	0	0	60	48	86	363	0	12	21432	6898	0.324
115.8	10391.6	45450	1.52	34	183	0	9	722	236	1532	45089	818	28	63	348	23252	167	31	89	0	22	535	326	4745	45	663	57	0	0	95	35	89	444	0	97	21367	7001	0.330
116	10402	45057	1.49	0	223	0	5	687	213	1505	44434	760	0	60	347	22802	154	92	119	0	77	460	309	4676	63	725	67	0	0	68	42	115	424	0	46	21061	6876	0.330
116.2	10412.6	45182	1.51	14	198	0	6	648	214	1553	44640	823	0	58	364	23508	127	124	73	0	41	476	291	4596	16	722	55	20	0	93	22	72	434	25	109	20653	6971	0.329
116.4	10423.2	45228	1.52	25	235	0	0	655	205	1591	45201	850	31	60	376	23082	178	155	138	24	17	467	329	4680	0	754	56	0	0	87	114	96	366	0	199	20685	6719	0.331
116.6	10433.8	45386	1.28	45	233	0	0	675	186	1568	44527	919	13	33	372	23591	157	131	107	0	21	449	354	4546	0	810	53	0	0	90	28	222	428	0	158	20706	6824	0.332
116.8	10444.4	45609	1.36	46	215	0	0	687	161	1523	44097	922	58	63	305	24468	161	97	111	0	0	393	242	4581	33	663	21	36	0	124	47	109	450	0	12	20898	6993	0.332
117	10455	45031	1.37	65	191	0	5	675	212	1527	42494	764	9	47	367	23818	180	50	74	13	5	498	268	4402	0	750	75	6	0	146	62	99	418	24	63	20752	6726	0.328
117.2	10465.6	45186	1.37	24	217	0	6	669	199	1501	43226	909	19	57	398	23742	212	85	121	0	89	460	274	4441	0	627	0	17	42	0	102	51	408	0	74	20907	7069	0.330
117.4	10476.2	45395	1.53	30	259	0	0	669	186	1584	44231	826	37	67	392	23534	140	101	28	0	59	390	310	4582	14	818	80	0	0	78	75	50	437	0	0	20909	7010	0.333
117.6	10486.8	44953	1.37	35	229	0	0	707	220	1446	43767	751	0	72	351	22276	189	60	152	26	81	445	208	4491	0	796	47	0	0	73	72	0	409	0	65	20623	6894	0.332
117.8	10497.4	44923	1.47	22	189	0	0	748	192	1511	43532	786	0	62	370	22824	138	61	92	0	88	459	295	4612	0	730	59	0	0	56	80	20	389	0	80	20947	6805	0.329
118	10508	45377	1.46	46	246	0	20	738	188	1538	43365	891	43	69	328	24621	151	158	62	0	70	348	274	4489	0	769	14	22	0	96	84	169	424	16	45	21170	6796	0.329
118.2	10518.6	45024	1.45	42	210	0	15	643	200	1448	42429	785	4	63	331	25193	215	82	90	0	108	429	259	4373	0	592	34	13	0	106	44	174	416	13	279	21059	6868	0.326
118.4	10529.2	45094	1.35	45	264	0	0	660	199	1588	44265	854	53	105	362	23435	182	68	128	0	84	392	251	4548	51	764	71	0	6	108	57	202	426	0	162	20625	6897	0.327
118.6	10539.8	45164	1.45	29	200	0	0	625	196	1582	45743	827	27	71	321	23123	130	31	137	0	111	443	289	4614	0	735	36	0	49	102	104	32	478	0	21	20850	7071	0.326
118.8	10550.4	44965	1.57	33	185	0	0	646	233	1485	44823	945	30	47	374	23474	165	30	106	0	0	403	262	4624	0	614	63	0	0	108	145	69	363	0	86	20905	6945	0.326
119	10561	46789	1.44	45	245	0	0	673	174	1569	45534	905	62	63	354	25308	156	37	50	0	54	413	290	4554	0	719	55	0	0	109	57	106	459	0	141	21075	6697	0.334
119.2	10571.8	45576	1.46	21	215	0	0	685	193	1469	42347	836	68	23	290	26267	138	0	94	0	51	430	240	4378	7	680	6	0	0	26	60	118	474	0	211	21048	7014	0.331
119.4	10582.6	46070	1.35	57	255	0	32	686	216	1496	43571	909	14	73	388	26917	200	9	164	0	133	453	262	4485	0	608	51	26	8	42	187	63	418	0	141	21120	6844	0.328
119.6	10593.4	46352	1.58	10	197	0	0	732	186	1540	42339	868	24	27	358	29085	164	58	35	0	0	424	272	4244	0	682	0	43	0	109	111	226	475	0	245	21346	6904	0.327
119.8	10604.2	45778	1.41	46	220	0	0	688	185	1470	42239	851	52	54	328	27185	142	31	125	0	15	376	320	4421	0	673	60	0	0	52	67	132	430	14	125	20655	6821	0.332
120	10615	44802	1.35	56	196	0	0	668	175	1452	44361	844	38	89	366	22653	196	98	131	5	75	500	288	4582	27	857	0	49	0	124	112	144	459	40	21	21089	6845	0.325
120.2	10625.6	44753	1.53	18	175	0	0	684	184	1462	43123	877	36	51	321	23735	159	52	81	0	133	377	268	4444	32	679	27	10	0	28	23	133	357	0	50	21234	6693	0.327
120.4	10636.2	45384	1.42	21	256	0	0	686	212	1423	43270	769	23	53	327	24830	209	55	157	0	52	519	229	4350	0	733	34	0	0	39	88	0	393	27	41	20983	7084	0.329
120.6	10646.8	45370	1.3	7	211	0	9	667	213	1570	43548	822	66	74	306	25505	177	22	85	0	139	449	271	4483	26	669	30	11	0	65	129	166	388	0	76	20810	6733	0.327
120.8	10657.4	44972	1.48	21	241	0	5	598	216	1541	44775	904	50	42	296	23421	154	17	107	0	31	451	343	4491	69	760	0	33	23	61	115	125	359	0	142	21090	6945	0.329
121	10668	44760	1.44	8	237	0	0	616	179	1643	43945	932	29	29	346	23598	159	72	71	0	61	406	332	4375	56	690	0	40	0	102	41	165	409	0	172	20653	6977	0.326
121.2	10678.8	45852	1.38	32	261	0	4	646	235	1529	43235	925	25	51	341	25829	178	0	88	0	110	385	308	4435	60	731	40	0	0	32	44	148	390	0	84	21158	6856	0.330
121.4	10689.6	45911	1.42	47	245	0	0	678	212	1612	40485	934	23	85	396	27475	159	45	142	0	50	450	467	4462	107	790	44	0	35	6	0	274	458	0	0	21898	7266	0.328
121.6	10700.4	45799	1.61	27	205	0	0	708	181	1522	38947	869	30	25	338	27660	174	46	123	0	86	511	317	4186	0	696	27	32	0	119	106	168	436	0	82	21258	7010	0.330
121.8	10711.2	45046	1.53	15	179	0	0	686	201	1534	37364	854	63	48	357	27835	148	52	77	37	88	467	202	4162	27	739	70	7	0	91	80	234	468	0	212	20708	6757	0.332
122	10722	45462	1.43	20	238	0	0	650	215	1614	40472	979	4	19	327	26436	176	48	105	0	0	379	293	4289	0	652	0	35	0	39	56	103	371	8	52	21076	6673	0.336
122.2	10733	45220	1.46	25	256	0	0	595	206	1581	40965	967	0	104	395	25644	174	170	196	18	89	486	360	4395	0	705	46	19	0	123	78	305	481	0	147	20676	6812	0.333
122.4	10744	45333	1.44	29	231	0	0	599	206	1621	43710	883	47	33	386	22779	179	201	143	0	24	550	261	4653	0	747	0	34	0	118	34	99	429	0	128	20884	6852	0.335
122.6	10755	44891	1.43	42	192	0	19	638	194	1449	45334	792	41	71	258	20036	165	235	157	0	103	535	288	4737	0	611	72	0	0	39	92	83	313	0	175	21239	7096	0.333
122.8	10766	44476	1.47	34	237	0	0	590	226	1526	45335	836	43	106	280	20235	214	214	153	0	63	526	289	4876	21	654	70	0	0	71	101	7	419	0	72	20868	6813	0.331
123	10777	45370	1.43	45	224	0	7	582	208	1677	45212	845	54	47	322	23877	209	162	178	0	114	488	387	4607	0	634	43	0	21	99	132	171	512	0	165	20493	6780	0.332
123.2	10787.6	45739	1.52	50	210	0	6	638	165	1604	41104	882	52	57	329	28533	197	99	91	0	68	417	238	4405	68	815	80	0	0	0	0	145	457	6	52	20387	6966	0.332
123.4	10798.2	46197	1.58	40	238	0	5	741	224	1579	38322	912	62	40	346	31363	154	67	27	0	75	459	296	4040	0	677	35	25	0	68	133	106	439	0	98	20607	6767	0.333
123.6	10808.8	45271	1.42	43	198	0	13	616	191	1597	38281	869	63	64	298	28446	180	34	65	0	141	394	291	4118	0	696	81	0	0	66	28	144	502	0	167	20548	6944	0.335
123.8	10819.4	44796	1.35	35	249	0	15	626	210	1702	39414	978	31	51	351	26223	149	78	90	16	81	388	346	4296	77	722	15	0	0	39	83	195	438	0	96	20520	6899	0.331
124	10830	45216	1.35	41	235	0	0	649	191	1544	38940	1038	43	39	312	27411	202	50	116	0	105	513	325	4359	0	635	0	27	8	86	130	260	487	0	158	20461	6832	0.334
124.2	10840.8	44444	1.25	32	298	0	0	624	227	1613	41129	989	64	44	290	24307	135	94	83	0	79	501	235	4363	66	634	32	15	0	85	66	135	422	0	142	20965	6977	0.331
124.4	10851.6	44604	1.41	33	257	0	29	1375	205	1569	39617	930	28	57	332	23721	143	84	94	0	69	583	334	4711	0	909	29	17	0	38	52	61	415	0	162	20880	7021	0.330
124.6	10862.4	43654	1.3	66	302	0	21	881	212	1519	39214	892	41	52	300	24203	152	14	91	18	52	458	259	4206	60	853	6	16	0	75	40	255	460	0	0	20448	6663	0.329
124.8	10873.2	45659	1.41	26	239	0	0	662	213	1611	41307	979	61	63	322	27014	176	54	74	7	102	533	305	4335	0	745	36	9	0	73	73	206	505	8	60	20781	6936	0.328
125	10884	46064	1.7	43	204	0	0	681	218	1620	36970	840	28	76	315	32657	137	0	67	0	81	443	352	3964	35	677	74	0	8	53	18	199	502	0	111	21261	6983	0.330
125.2	10894.6	44955	1.42	40	238	0	0	725	192	1419	34090	826	36	71	284	32811	175	8	68	0	64	441	270	3840	7	598	20	0	0	86	63	187	525	0	103	20438	6572	0.325
125.4	10905.2	44293	1.42	36	236	0	0	544	186	1572	37906	917	36	34	314	27180	134	14	95	0	84	451	300	4049	75	757	5	43	15	75	107	113	421	0	106	20206	6735	0.329
125.6	10915.8	44457	1.53	31	239	0	5	580	197	1534	39293	906	55	76	334	26315	178	44	56	15	41	432	340	4216	24	648	19	10	0	68	111	132	485	0	25	20697	6878	0.330
125.8	10926.4	44432	1.51	19	234	0	0	632	181	1528	39200	946	12	57	338	26110	144	63	120	0	77	438	329	4281	52	616	21	38	0	88	8	137	515	12	65	20543	6885	0.329
126	10937	44766	1.4	41	254	0	8	626	216	1549	40283	912	12	54	301	26355	156	57	134	0	177	457	414	4218	0	614	37	23	34	86	0	244	483	0	68	20693	6858	0.330
126.2	10947.6	44712	1.97	41	224	0	30	599	222	1642	40344	865	16	91	327	26567	127	28	125	0	111	496	283	4293	33	627	81	0	0	6	67	228	419	0	45	20169	6922	0.330
126.4	10958.2	44668	1.51	54	213	0	0	569	188	1686	40618	895	32	44	311	26707	157	131	95	0	34	387	249	4337	64	698	29	8	0	57	135	84	494	0	154	20180	6866	0.328
126.6	10968.8	44715	1.48	33	236	0	47	594	209	1706	41325	1008	28	35	315	26346	162	29	90	4	73	392	350	4369	0	810	0	39	0	133	84	92	427	0	122	20446	7184	0.325
126.8	10979.4	44598	1.28	42	262	0	0	618	204	1635	40118	1018	42	54	322	26030	222	33	129	12	139	475	359	4279	26	720	10	30	0	39	61	216	391	10	106	20498	6800	0.329
127	10990	44602	1.62	8	210	0	12	626	218	1699	42175	974	67	57	352	25668	224	69	93	39	75	400	277	4435	18	659	23	25	0	93	42	75	421	0	79	20428	6839	0.324
127.2	11000.6	44406	1.34	41	238	0	6	580	186	1685	40419	943	11	60	326	25176	132	7	78	0	118	466	404	4339	0	825	55	0	30	88	114	214	464	0	94	20436	6863	0.327
127.4	11011.2	44702	1.45	24	197	0	25	591	187	1574	40293	869	0	65	328	28597	168	88	69	0	56	383	362	4283	0	742	41	14	0	87	99	155	443	0	157	20241	6880	0.324
127.6	11021.8	44533	1.41	35	227	0	0	624	213	1631	39303	956	48	35	338	25784	157	75	98	34	48	373	341	4427	0	765	0	31	0	82	83	121	457	0	127	20622	6876	0.326
127.8	11032.4	44769	1.49	22	219	0	0	648	160	1688	40452	910	27	26	351	25791	178	46	90	0	95	436	320	4513	0	773	0	43	0	71	83	190	422	0	141	20477	6834	0.327
128	11043	44246	1.37	37	242	0	0	576	218	1645	42279	984	33	77	385	24659	115	63	116	0	162	444	345	4479	0	729	36	8	0	69	58	199	402	0	103	20536	6943	0.322
128.2	11053.4	44602	1.5	60	228	0	23	621	217	1658	42675	866	70	72	378	24438	162	47	126	27	12	470	356	4556	74	691	33	0	6	79	61	78	415	0	157	21083	6888	0.323
128.4	11063.8	45006	1.35	23	235	0	10	608	179	1585	42725	923	52	65	324	25534	200	39	134	0	63	451	328	4546	23	759	21	0	28	75	75	0	505	0	71	20465	6711	0.324
128.6	11074.2	44343	1.34	57	238	0	0	649	206	1590	41799	898	47	14	358	25125	171	102	122	15	49	423	306	4356	0	737	70	0	0	88	99	153	481	0	96	20566	6850	0.322
128.8	11084.6	44864	1.38	34	186	0	0	673	199	1486	40334	854	15	40	332	26563	80	34	122	0	85	391	287	4371	0	626	45	0	0	17	49	128	389	0	159	20471	6626	0.326
129	11095	44811	1.47	30	208	0	12	664	237	1597	41118	859	61	36	309	27099	177	69	100	38	162	554	374	4202	20	812	50	0	0	31	95	174	432	0	306	20526	6858	0.324
129.2	11105.6	43945	1.47	16	223	0	5	630	245	1559	40454	802	58	72	305	25981	157	83	133	0	58	428	257	4194	0	672	81	0	0	41	0	0	465	5	162	20368	6588	0.323
129.4	11116.2	44621	1.4	46	198	0	22	660	206	1501	38938	845	0	90	428	26616	164	48	76	0	147	415	370	4372	0	837	80	7	24	49	61	212	412	0	147	20678	6975	0.327
129.6	11126.8	43996	1.29	30	198	0	0	658	249	1498	39257	831	58	35	316	25382	189	81	131	0	100	484	242	4306	14	729	0	43	13	100	128	5	484	11	140	20759	6855	0.321
129.8	11137.4	43328	1.42	51	223	0	9	706	250	1492	40311	824	28	109	230	23273	174	113	151	41	102	480	294	4469	0	696	57	10	0	80	113	183	475	0	13	20095	6680	0.321
130	11148	43168	1.42	17	230	0	12	661	192	1493	40747	797	52	60	305	22352	137	96	122	0	124	538	251	4392	40	818	6	18	0	44	86	105	344	0	75	20505	6724	0.317
130.2	11158.4	43714	1.48	35	204	0	6	740	202	1533	41382	823	11	68	351	22495	171	125	148	0	33	459	244	4448	0	667	34	6	0	107	90	132	414	0	129	20857	6926	0.320
130.4	11168.8	44202	1.43	36	205	0	5	670	228	1578	41089	843	31	73	348	24440	99	0	77	0	35	467	242	4591	24	628	52	0	0	44	80	141	380	8	56	20892	6883	0.318
130.6	11179.2	45011	1.52	21	232	0	0	700	184	1562	39986	844	82	37	326	26680	187	71	116	0	62	512	292	4241	0	796	73	0	0	39	83	184	438	0	96	20983	6583	0.321
130.8	11189.6	44675	1.42	23	229	0	38	725	211	1521	36992	745	33	45	285	27892	171	0	103	0	117	433	326	4109	0	774	95	0	0	25	26	82	436	0	123	21210	7098	0.319
131	11200	44623	1.44	10	209	0	20	741	177	1508	38203	868	15	59	318	25613	141	45	89	7	24	407	315	4062	24	655	14	27	6	35	53	142	438	10	88	21004	6943	0.325
131.2	11210.4	43964	1.37	29	206	0	0	700	207	1508	39929	761	28	39	324	24748	158	62	144	10	0	417	318	4093	0	594	31	10	0	54	125	0	424	0	125	20297	6994	0.326
131.4	11220.8	44058	1.4	53	240	0	17	690	209	1468	41367	737	35	80	277	23188	172	69	80	0	68	516	293	4208	48	739	51	11	0	121	161	25	437	0	0	20603	6926	0.326
131.6	11231.2	44373	1.44	36	197	0	0	744	218	1446	38852	741	47	19	315	23333	166	68	78	0	128	474	283	4316	0	769	5	32	0	49	121	52	387	0	90	20993	7039	0.330
131.8	11241.6	45218	1.34	34	222	0	0	746	204	1419	34994	885	11	44	284	28819	176	70	36	4	8	471	343	4229	46	674	32	4	0	131	30	270	501	0	167	20982	6978	0.327
132	11252	45386	1.39	35	116	0	0	807	206	1401	34252	728	60	26	318	32429	130	92	118	0	50	546	335	4029	20	750	43	0	0	151	134	192	427	0	77	20872	6927	0.326
132.2	11262.4	45715	1.54	0	173	0	0	750	211	1432	38067	832	47	74	328	28371	148	44	62	0	37	482	256	4205	45	674	30	39	57	61	101	130	533	0	167	21196	6901	0.334
132.4	11272.8	45839	1.5	43	202	0	38	698	161	1540	37512	921	67	68	307	29618	168	123	121	0	122	492	354	4185	0	771	48	0	0	66	89	216	530	12	234	21401	6745	0.332
132.6	11283.2	46057	1.27	30	167	0	25	745	188	1518	34988	732	22	47	262	32261	106	150	106	0	100	405	380	4257	0	651	72	17	0	108	192	104	480	0	187	21023	6955	0.332
132.8	11293.6	45406	1.3	21	198	0	0	725	180	1548	39207	885	48	46	274	27367	154	97	153	0	58	378	303	4305	0	674	0	28	17	32	47	115	470	0	73	21014	6966	0.333
133	11304	44839	1.25	18	230	0	13	667	227	1611	40941	836	50	49	259	23666	182	90	99	0	38	527	290	4487	0	731	46	12	0	86	166	11	439	0	75	20755	7138	0.332
133.2	11314.2	45177	1.65	32	231	0	17	683	192	1659	40933	921	62	60	336	24166	132	43	105	0	94	457	368	4547	26	863	40	28	0	63	30	103	494	0	0	21021	7005	0.329
133.4	11324.4	45116	1.46	26	254	0	0	628	211	1649	41535	934	27	80	340	23934	174	60	124	0	78	477	342	4524	0	635	19	38	14	57	53	101	388	0	168	20918	7111	0.331
133.6	11334.6	45269	1.5	42	224	0	36	651	234	1636	41964	929	0	33	346	23481	163	61	91	0	85	534	364	4691	0	715	7	36	0	62	145	166	444	0	157	21202	6973	0.332
133.8	11344.8	45782	1.44	19	259	0	0	665	180	1679	42672	865	41	71	332	24362	223	50	132	0	0	414	233	4609	0	652	42	5	41	84	46	7	393	0	0	21434	6927	0.330
134	11355	44984	1.77	28	251	0	26	690	210	1635	41018	851	27	74	303	24159	161	57	81	0	135	552	303	4512	5	680	65	30	0	83	92	184	467	0	101	21333	7262	0.327
134.2	11365.4	44944	1.31	34	218	0	7	650	181	1573	41250	908	53	40	331	23562	167	59	122	0	5	523	261	4425	0	696	0	24	14	47	112	47	431	0	166	21179	6885	0.327
134.4	11375.8	44673	1.5	27	216	0	0	662	163	1608	40494	728	40	38	309	22793	167	52	116	0	135	566	307	4459	84	723	50	0	7	77	57	195	449	0	134	21009	6851	0.328
134.6	11386.2	44983	1.48	29	201	0	8	636	222	1592	39817	843	14	27	279	24470	152	82	135	36	102	511	287	4511	5	645	26	28	0	57	43	99	475	0	139	21102	6902	0.328
134.8	11396.6	44632	1.32	28	202	0	20	636	221	1579	39937	842	39	54	314	24378	167	34	75	0	110	512	273	4342	0	710	13	25	0	10	164	38	384	0	123	21091	6694	0.328
135	11407	44655	1.46	50	206	0	6	663	211	1587	40475	875	25	63	330	23022	215	135	141	0	98	513	335	4496	35	773	59	0	0	85	108	133	436	9	106	21488	6896	0.328
135.2	11417.4	44323	1.36	25	224	0	0	604	231	1544	40570	837	25	63	355	22824	151	101	85	0	0	508	334	4584	0	714	15	0	5	20	109	178	414	0	20	21866	6773	0.324
135.4	11427.8	44337	1.39	36	192	0	9	664	193	1499	39529	817	52	73	345	23081	193	116	181	0	137	494	256	4488	23	687	8	23	30	80	104	106	417	9	182	21297	6933	0.325
135.6	11438.2	44331	1.54	47	222	0	0	661	211	1570	39705	864	0	89	326	23623	117	121	92	4	61	484	242	4399	80	713	69	0	18	90	103	121	358	0	37	21270	7024	0.323
135.8	11448.6	43980	1.62	24	205	0	23	613	218	1632	39086	886	42	67	364	24738	162	61	185	0	0	539	301	4412	124	721	68	0	7	26	86	80	485	30	89	21374	6876	0.321
136	11459	44918	1.35	36	221	0	19	644	211	1681	39948	920	46	71	341	25359	174	67	130	0	88	521	439	4575	0	758	49	11	0	62	92	132	502	12	120	20722	6674	0.327
136.2	11469.4	44589	1.31	21	244	0	0	632	238	1594	38840	908	36	54	388	25905	140	78	34	44	97	367	276	4211	71	783	16	42	0	104	63	119	380	0	97	21129	6627	0.327
136.4	11479.8	45846	1.51	24	197	0	23	671	210	1602	38135	903	38	28	289	31391	187	48	70	27	57	483	263	4173	0	757	43	7	0	42	128	86	552	12	203	21246	6777	0.327
136.6	11490.2	45137	1.38	41	235	0	24	707	218	1586	36722	995	37	62	316	27469	207	0	81	0	79	350	344	4167	0	632	55	0	53	37	45	87	420	42	137	21045	6780	0.331
136.8	11500.6	44454	1.45	38	211	0	0	624	192	1486	35347	931	57	63	311	27575	175	0	90	0	141	482	296	4132	0	863	29	0	38	17	191	39	424	11	114	21049	6821	0.327
137	11511	44527	1.46	26	247	0	0	659	223	1614	36897	833	0	89	310	26982	136	17	161	0	95	469	315	4207	0	670	73	28	37	111	108	57	507	0	66	21517	6994	0.325
137.2	11521.2	44557	1.29	34	201	0	0	690	206	1575	36189	845	35	39	269	27182	170	61	169	14	77	416	306	4178	0	773	34	18	29	84	59	111	439	0	81	20958	6710	0.325
137.4	11531.4	44939	1.39	18	221	0	23	608	197	1634	35635	893	32	48	312	29833	208	108	117	14	114	418	328	4032	0	702	4	0	0	75	162	143	427	0	118	20687	6641	0.328
137.6	11541.6	45163	1.44	59	208	0	24	688	214	1531	35759	837	0	37	315	30249	181	73	113	0	42	508	206	4159	11	776	5	16	0	81	15	264	449	0	117	21523	6811	0.325
137.8	11551.8	45134	1.44	41	185	0	13	648	193	1572	35184	840	34	106	285	30807	151	88	130	0	117	433	290	4226	0	650	107	0	8	58	87	214	440	0	179	20984	6679	0.327
138	11562	45127	1.53	16	189	0	0	673	227	1596	36258	809	75	21	316	29927	132	101	99	0	91	533	234	3991	0	695	77	0	0	120	101	237	428	10	81	20768	6951	0.326
138.2	11572.4	44344	1.38	41	176	0	7	674	224	1485	36775	786	56	80	297	27123	143	55	88	0	25	584	315	4151	0	657	21	5	0	59	50	89	463	0	96	20453	6675	0.325
138.4	11582.8	44184	1.41	34	249	0	0	629	173	1575	37555	852	73	26	252	26341	149	81	114	27	78	509	283	4227	19	758	48	0	0	96	69	112	303	0	197	20801	6511	0.324
138.6	11593.2	44328	1.55	39	240	0	16	692	214	1584	37793	822	6	73	315	26338	110	115	138	26	91	441	320	4210	70	814	86	8	0	67	87	129	405	0	13	21199	6649	0.321
138.8	11603.6	44354	1.4	65	223	0	9	596	170	1616	38356	861	38	52	305	24997	137	51	63	0	93	576	385	4330	0	831	31	0	0	98	36	137	406	0	53	21151	6961	0.325
139	11614	44333	1.36	33	184	0	5	600	178	1567	37089	871	28	99	298	26200	107	81	46	0	178	456	351	4064	0	778	68	0	0	48	69	20	379	18	21	21190	6799	0.325
139.2	11624.4	44109	1.41	28	240	0	8	689	234	1520	37592	839	19	62	322	25838	149	65	64	0	91	518	356	4383	0	723	9	23	0	19	28	190	455	0	69	21190	6671	0.323
139.4	11634.8	44851	1.38	28	180	0	16	663	214	1573	36708	858	7	106	299	26986	139	61	81	0	96	478	223	4374	0	681	42	15	0	29	70	176	413	0	157	21060	6850	0.327
139.6	11645.2	43551	1.31	20	161	0	4	643	202	1486	34193	752	40	62	321	25560	117	62	52	0	0	532	300	4241	0	764	33	5	0	71	35	169	440	0	0	20979	6582	0.327
139.8	11655.6	44360	1.39	33	199	0	0	675	220	1540	36281	895	33	42	303	25999	152	68	136	0	8	500	358	4410	0	708	0	36	62	0	46	82	467	0	184	21128	6818	0.326
140	11666	44552	1.57	12	216	0	11	722	219	1557	36862	875	65	59	286	26933	182	129	128	0	215	542	331	4248	0	701	0	13	0	132	38	67	437	0	146	21042	6812	0.323
140.2	11676.6	44452	1.47	54	206	0	7	729	234	1538	36924	864	28	38	336	25334	110	31	108	0	123	478	351	4295	29	769	37	28	0	84	72	213	430	0	85	20937	6830	0.328
140.4	11687.2	43853	1.45	50	211	0	12	660	223	1502	37222	876	30	68	274	24950	157	70	92	0	37	513	308	4329	77	739	12	23	0	51	36	146	372	0	49	20835	6777	0.324
140.6	11697.8	43654	1.32	31	188	0	12	656	197	1390	35934	737	46	26	331	24611	144	57	95	0	99	515	308	4321	0	666	49	0	0	56	124	148	506	0	103	21294	6760	0.325
140.8	11708.4	43396	1.35	45	221	0	0	672	214	1435	35981	721	27	38	270	24944	146	83	102	0	0	401	255	4339	31	660	62	0	0	92	91	203	482	0	25	21185	6940	0.323
141	11719	43047	1.5	28	204	0	0	645	215	1522	36734	757	24	34	265	24631	136	46	54	0	80	503	261	4418	0	766	29	5	21	44	165	40	391	0	29	21323	7016	0.316
141.2	11729.2	43116	1.52	8	217	0	19	665	211	1542	37243	807	31	31	246	24559	142	0	57	0	37	527	274	4274	0	707	38	9	51	98	87	70	401	0	132	20733	6801	0.317
141.4	11739.4	43531	1.43	5	207	0	7	638	229	1464	38755	848	15	94	282	24023	180	91	73	0	51	495	235	4365	0	747	43	0	0	35	151	94	361	0	107	21030	6636	0.322
141.6	11749.6	43767	1.37	38	226	0	0	617	234	1535	36279	860	37	103	275	26241	116	39	91	0	123	515	270	4088	68	753	73	0	0	92	71	213	483	0	52	20938	6742	0.322
141.8	11759.8	43270	1.38	32	208	0	12	656	227	1502	35491	853	69	70	270	25681	175	109	118	0	43	460	292	4205	46	750	51	0	0	57	80	98	412	28	87	20654	6714	0.321
142	11770	43653	1.48	42	213	0	15	656	195	1571	36748	782	47	69	287	25143	164	64	109	12	22	508	285	4248	0	801	39	0	16	91	38	171	343	0	40	20654	6533	0.322
142.2	11780.6	43615	1.27	28	191	0	0	636	204	1565	37923	952	7	77	301	25126	146	105	160	0	151	492	273	4426	0	650	23	17	0	41	129	83	425	11	42	20831	6747	0.321
142.4	11791.2	43700	1.43	0	249	0	0	690	202	1568	38412	830	50	100	310	23986	200	134	67	0	17	479	272	4324	8	730	49	5	0	101	25	54	443	0	70	20944	6680	0.324
142.6	11801.8	42752	1.32	34	170	0	0	730	214	1370	36357	772	0	70	310	22640	158	154	135	62	120	557	303	4279	36	791	46	0	0	47	83	145	385	0	66	20948	7001	0.321
142.8	11812.4	43205	1.6	34	218	0	7	684	255	1545	37177	871	0	84	307	23624	145	68	154	0	104	691	337	4227	88	675	45	23	0	104	120	104	392	0	28	20771	6818	0.324
143	11823	43469	1.27	31	209	0	4	636	207	1604	36781	787	0	33	268	24248	157	71	92	0	40	556	251	4151	0	637	65	0	0	63	22	129	454	0	69	21159	6788	0.327
143.2	11833.4	44029	1.44	16	196	0	0	635	234	1566	37624	794	11	68	291	25477	199	77	136	0	83	606	354	4251	30	753	76	0	0	55	186	215	461	0	84	20387	6539	0.325
143.4	11843.8	44214	1.36	35	191	0	0	668	216	1588	37715	877	0	65	281	24694	159	121	120	46	44	547	219	4228	0	623	51	0	0	36	62	74	422	0	205	20671	6784	0.329
143.6	11854.2	43214	1.41	32	223	0	0	570	244	1532	36669	926	55	21	273	24053	130	50	103	0	139	428	319	3997	0	773	0	27	10	72	112	134	370	0	63	20621	6628	0.327
143.8	11864.6	43304	1.82	37	205	0	0	681	275	1552	35365	820	16	69	275	25463	119	16	94	0	17	478	187	3937	57	595	42	6	50	30	84	225	460	0	100	20758	6602	0.328
144	11875	43486	1.49	0	195	0	0	606	256	1540	35075	858	75	57	260	26683	157	43	130	0	81	501	360	3980	0	714	40	17	21	79	83	230	453	0	161	20375	6542	0.326
144.2	11885.4	43476	1.52	0	191	0	27	646	241	1538	33978	773	16	71	246	27294	138	52	78	0	72	490	342	3864	46	783	89	0	37	82	101	161	381	0	95	20406	6482	0.328
144.4	11895.8	43024	1.55	32	204	0	0	650	261	1501	34721	801	20	21	245	24888	185	88	126	26	48	503	269	3964	0	737	51	30	0	103	110	114	396	0	190	20893	6707	0.329
144.6	11906.2	42770	1.42	9	191	0	11	591	214	1393	34416	937	6	5	237	24247	152	70	84	0	94	510	344	4033	0	610	0	41	39	54	0	127	346	0	67	20297	6458	0.328
144.8	11916.6	43204	1.35	32	207	0	0	628	201	1474	35225	799	28	53	260	25086	191	30	72	13	55	517	206	4100	8	532	14	24	16	114	0	145	431	0	7	20431	6714	0.326
145	11927	43219	1.43	40	227	0	5	632	266	1527	37177	885	35	65	234	24370	163	62	161	13	114	595	213	4039	48	758	75	0	8	28	52	171	372	0	5	20654	6758	0.323
145.2	11937.4	43868	1.43	4	224	0	0	636	215	1636	39017	883	0	24	295	24269	163	74	102	0	123	469	302	4270	0	751	17	52	0	95	129	68	390	0	113	20877	6699	0.324
145.4	11947.8	43350	1.46	47	195	0	8	663	216	1580	37403	884	36	58	236	23739	189	13	31	0	67	563	273	4139	17	707	21	25	17	29	27	161	340	5	25	21048	6639	0.326
145.6	11958.2	43302	1.44	40	219	0	39	676	282	1476	36865	785	0	72	231	22752	209	0	99	0	61	559	221	4265	0	712	65	0	55	34	42	155	456	27	57	20663	6661	0.328
145.8	11968.6	43505	1.36	39	201	0	0	686	225	1462	36515	827	23	30	321	23737	117	45	60	0	80	469	294	4211	0	703	47	30	0	68	60	0	393	0	79	21436	6830	0.326
146	11979	43933	1.41	0	171	0	29	691	213	1523	37926	851	15	67	245	23699	155	67	135	0	107	585	322	4487	62	700	4	15	0	154	108	73	418	0	107	21072	6799	0.326
146.2	11989.6	43682	1.37	27	181	0	14	702	225	1457	35916	819	51	19	238	24422	110	0	106	0	73	511	325	4425	12	635	36	5	39	13	19	190	344	5	21	21022	6603	0.332
146.4	12000.2	43331	1.37	28	145	0	6	729	178	1470	35884	769	26	53	275	25213	161	57	103	0	105	503	239	4214	33	759	40	22	45	89	119	0	422	0	140	20942	6848	0.328
146.6	12010.8	43266	1.35	36	217	0	0	653	190	1484	38021	695	0	57	268	23134	141	15	38	0	87	503	214	4428	0	691	51	0	4	41	90	153	366	0	9	20447	6861	0.328
146.8	12021.4	42254	1.55	17	165	0	7	717	200	1414	36188	743	53	44	286	22629	146	95	103	0	32	493	266	4376	0	733	84	0	0	60	132	126	405	0	0	19774	6593	0.327
147	12032	41843	1.43	19	159	0	39	803	224	1238	33322	688	10	28	275	21410	147	84	76	8	112	503	283	4477	14	691	17	21	0	74	54	131	355	0	88	20671	6792	0.328
147.2	12042.4	42467	1.41	20	178	0	9	779	262	1450	35619	692	39	50	230	22275	125	0	77	0	127	442	303	4611	37	739	59	0	42	5	137	70	336	0	81	20224	6698	0.326
147.4	12052.8	43335	1.34	48	225	0	0	702	184	1532	38909	814	27	92	248	23681	143	58	63	0	8	513	305	4585	60	710	68	0	0	52	102	95	452	0	68	19881	6536	0.328
147.6	12063.2	42573	1.6	4	212	0	17	682	250	1532	39098	824	47	80	246	22708	185	27	117	0	68	499	217	4486	0	695	16	19	0	107	132	62	399	0	85	19585	6644	0.328
147.8	12073.6	42625	1.38	43	221	0	22	577	206	1417	38847	738	39	34	267	22302	197	37	135	40	23	551	239	4465	0	752	24	11	0	124	71	159	435	0	81	19691	6688	0.329
148	12084	42520	1.48	5	163	0	0	629	197	1472	38136	838	36	49	278	22546	211	60	75	0	113	505	328	4436	20	698	0	26	0	114	33	121	409	0	50	19938	6704	0.325
148.2	12094.4	42372	1.45	25	212	0	15	602	265	1431	38087	775	32	45	303	23753	173	66	126	0	45	474	218	4226	0	705	57	15	0	6	127	90	406	0	176	19691	6561	0.326
148.4	12104.8	42586	1.77	6	212	0	0	622	202	1570	39481	820	41	67	320	23678	183	53	116	0	61	492	333	4261	0	752	67	0	0	54	108	154	370	8	72	19885	6732	0.325
148.6	12115.2	45051	1.35	25	237	0	0	659	203	1535	41902	828	34	22	333	25142	192	77	125	0	38	538	248	4572	47	633	20	20	0	48	44	155	441	0	55	20480	6867	0.326
148.8	12125.6	56743	1.63	31	245	0	18	660	211	1466	39630	1264	45	20	287	23472	202	59	216	0	66	512	243	4981	0	895	23	14	27	10	114	146	384	10	21	29972	7879	0.365
149	12136
149.2	12146.6
149.4	12157.2
149.6	12167.8	42444	1.4	45	157	0	4	687	206	1378	33792	662	10	69	265	22277	175	71	108	0	0	549	271	4132	128	668	106	0	0	19	65	257	370	0	62	20205	6575	0.340
149.8	12178.4	43920	1.41	38	199	0	0	737	190	1460	36083	894	29	71	215	22637	138	76	69	32	103	608	264	4253	21	693	0	42	20	149	101	102	412	0	82	21037	6890	0.339
150	12189	44314	1.38	49	198	0	11	715	176	1415	36192	798	53	16	282	23822	139	114	116	0	82	437	319	4319	0	754	28	0	0	84	15	150	421	27	148	21105	6765	0.338
150.2	12199.4	45008	1.61	34	192	0	40	752	187	1578	36718	858	35	63	278	24245	169	62	65	0	85	551	285	4556	38	920	86	0	0	66	69	111	442	0	145	21873	7093	0.334
150.4	12209.8	44394	1.46	39	220	0	0	737	191	1467	35244	780	32	53	247	24142	157	19	61	5	149	608	225	4315	0	657	84	0	23	62	50	109	338	0	65	21756	7040	0.331
150.6	12220.2	44915	1.48	34	192	0	0	731	172	1492	35387	800	0	73	238	24140	151	0	129	0	99	527	291	4320	0	833	80	21	56	42	117	100	325	5	160	21557	6820	0.337
150.8	12230.6	45055	1.41	29	162	0	0	683	178	1440	36708	778	8	31	288	24405	151	82	126	46	59	510	310	4425	75	671	54	26	0	119	19	201	403	0	135	21922	6846	0.335
151	12241	44331	1.35	31	189	0	14	689	192	1500	35669	790	22	61	309	23806	151	74	70	0	25	557	286	4318	9	769	68	0	0	27	0	145	461	0	145	21922	6709	0.334
151.2	12251.4	45244	1.67	36	216	0	7	705	228	1384	35685	751	33	74	220	24650	139	25	112	18	98	555	284	4469	0	765	41	0	0	28	220	255	371	0	145	21875	6908	0.338
151.4	12261.8	45060	1.37	41	193	0	0	755	208	1537	36310	903	38	11	288	22981	121	49	96	0	93	674	282	4742	0	830	57	12	7	17	132	17	336	0	24	22250	7206	0.334
151.6	12272.2	44805	1.53	42	196	0	0	787	198	1409	35673	814	0	74	264	22046	178	23	62	0	47	601	304	4558	46	663	49	19	0	91	38	120	449	0	0	21931	7111	0.338
151.8	12282.6	44616	1.41	31	195	0	17	758	184	1445	35731	801	63	57	264	22091	160	95	87	0	35	630	316	4683	0	739	22	16	0	0	134	207	386	0	85	22292	6847	0.331
152	12293	44813	1.86	28	159	0	0	798	203	1412	36880	819	86	54	241	22112	161	65	94	0	96	639	428	4463	0	779	46	18	0	42	98	55	351	0	80	21907	6929	0.334
152.2	12303.6	44654	1.43	36	195	0	0	762	200	1437	36023	759	43	36	252	21842	171	61	72	0	100	591	341	4655	60	839	17	11	38	23	86	177	430	0	110	22223	6821	0.332
152.4	12314.2	45156	1.38	14	195	0	8	760	171	1418	36896	828	10	60	280	22402	169	24	63	0	110	602	275	4616	0	858	44	0	17	53	85	143	428	0	152	22211	7038	0.331
152.6	12324.8	45235	1.49	26	186	0	0	763	163	1579	36213	873	8	51	254	23177	166	10	99	0	54	621	288	4447	15	708	61	0	58	51	47	175	450	4	115	22156	6969	0.334
152.8	12335.4	44709	1.35	44	193	0	8	687	186	1481	35960	810	0	28	258	22578	148	45	68	0	0	593	263	4386	0	820	58	0	0	48	103	73	403	0	15	21805	6981	0.334
153	12346	44740	1.5	31	172	0	16	734	199	1487	36137	884	36	70	236	23676	118	53	87	0	14	624	331	4472	33	789	40	0	0	55	262	161	433	18	53	22402	7172	0.331
153.2	12356.6	45167	1.44	47	230	0	20	713	179	1527	37596	838	35	54	275	23528	145	40	97	0	169	572	335	4533	9	823	59	0	0	95	23	142	377	19	76	22552	7229	0.327
153.4	12367.2	45366	1.38	32	174	0	15	738	189	1467	37400	769	33	47	230	23710	156	9	66	0	45	603	271	4713	0	780	16	19	0	26	59	147	411	0	107	22286	6923	0.331
153.6	12377.8	45184	1.41	52	201	0	19	741	208	1535	37146	812	48	49	269	23843	141	51	79	0	81	627	315	4423	94	774	95	0	0	31	133	177	371	0	62	22120	6849	0.329
153.8	12388.4	45221	1.46	47	195	0	17	706	254	1544	36428	845	56	71	260	25035	173	65	58	10	114	575	392	4419	0	830	29	0	0	39	159	106	402	0	144	22221	6926	0.331
154	12399	45598	1.3	8	193	0	0	706	153	1454	34340	926	38	18	364	27323	138	0	32	0	20	581	275	4242	0	768	30	16	22	13	57	181	450	0	71	21934	6745	0.331
154.2	12409.6	44851	1.6	15	187	0	8	734	160	1406	34746	768	37	54	319	24137	107	46	81	0	111	654	262	4375	23	724	59	0	26	38	44	119	418	10	132	22126	7047	0.333
154.4	12420.2	45073	1.31	15	164	0	0	707	167	1508	35991	870	50	24	307	23317	167	46	122	0	18	603	293	4457	0	776	48	0	0	42	119	92	430	0	0	21879	7079	0.335
154.6	12430.8	44998	1.4	14	169	0	6	712	213	1432	35986	757	43	62	371	23565	140	59	119	0	38	530	242	4519	32	827	74	16	0	43	45	199	415	0	61	22011	6921	0.336
154.8	12441.4	45254	1.44	21	193	0	14	740	190	1542	36526	753	30	62	394	23424	167	107	114	9	66	685	290	4492	18	752	62	5	0	93	58	279	429	10	103	21923	7004	0.336
155	12452	45236	1.54	29	203	0	28	721	166	1485	36897	870	59	43	289	23193	156	93	104	0	44	610	349	4521	0	647	7	28	0	50	125	35	409	13	92	22184	7115	0.337
155.2	12462.8	45706	1.39	30	207	0	21	678	211	1481	37660	828	44	74	269	23628	182	31	136	0	121	584	350	4824	41	782	53	0	0	83	47	225	455	26	49	22260	6935	0.336
155.4	12473.6	45703	1.62	49	204	0	18	730	160	1497	38557	964	33	51	275	22302	171	69	95	0	155	544	338	4816	0	605	25	16	0	60	53	189	345	19	101	22469	6774	0.339
155.6	12484.4	45922	1.45	9	206	0	30	681	172	1580	38471	869	45	57	252	22928	178	20	110	0	108	598	307	4791	0	705	56	7	0	27	136	160	399	0	164	22077	6975	0.339
155.8	12495.2	45787	1.59	53	203	0	47	755	200	1437	38058	822	55	69	257	25014	198	62	97	10	60	628	233	4650	0	633	68	13	0	73	138	73	414	0	99	21751	7043	0.337
156	12506	46322	1.42	36	196	0	10	697	186	1465	36188	822	40	37	270	29792	200	46	101	0	38	657	299	4560	0	601	0	33	0	81	81	247	543	0	82	21564	6692	0.339
156.2	12516.6	45520	1.29	18	190	0	28	697	181	1577	36657	878	72	55	328	25667	167	27	79	0	54	639	402	4477	0	849	47	5	0	78	147	137	449	0	137	20976	6877	0.338
156.4	12527.2	45285	1.44	25	202	0	60	775	165	1554	35713	835	26	64	315	27484	206	45	88	0	52	530	313	4387	0	765	41	26	0	48	0	185	449	0	76	21060	6702	0.333
156.6	12537.8	45447	1.47	35	169	0	17	708	158	1541	35216	902	29	58	301	28672	167	45	113	0	103	488	325	4542	0	765	47	15	0	60	132	125	475	0	108	20740	6907	0.334
156.8	12548.4	45542	1.48	15	161	0	5	735	173	1571	34910	1005	31	79	304	28880	172	53	104	0	108	584	316	4515	0	782	43	15	0	98	91	189	474	0	8	20661	6854	0.335
157	12559	45349	1.34	22	195	0	7	758	190	1502	35400	887	62	69	351	26783	199	61	97	0	69	523	342	4573	0	837	70	0	0	43	40	178	468	0	127	21307	6947	0.335
157.2	12569.8	45559	1.38	17	186	0	26	693	164	1495	33973	998	24	78	317	28172	191	30	133	0	51	416	362	4373	0	687	21	41	0	49	24	89	524	0	113	21767	7073	0.332
157.4	12580.6	46517	1.4	39	195	0	7	794	210	1545	32516	782	49	95	340	30163	143	15	87	0	56	489	308	4196	0	627	57	22	6	110	120	137	559	0	102	21909	6939	0.335
157.6	12591.4	46610	1.39	45	221	0	10	767	191	1542	33199	897	74	17	265	30812	149	17	79	0	91	476	251	4125	10	787	7	48	5	59	211	64	500	0	116	22364	7095	0.334
157.8	12602.2	46005	1.49	14	173	0	0	704	161	1501	34974	829	56	92	311	28775	170	11	141	0	103	533	270	4201	0	737	74	0	32	100	109	159	467	0	85	22107	6984	0.327
158	12613	46024	1.57	13	202	0	23	727	199	1519	35225	867	15	96	322	27558	141	76	109	0	46	543	276	3933	0	977	87	0	0	61	185	22	464	0	114	22069	6927	0.333
158.2	12623.8	45948	1.36	10	191	0	13	688	190	1512	35539	865	0	64	321	27562	106	27	48	0	87	547	296	4164	71	686	42	20	25	74	91	205	456	0	150	22387	6832	0.334
158.4	12634.6	46418	1.57	22	208	0	17	784	207	1451	33833	859	0	65	258	31783	136	78	80	0	110	492	292	4126	0	791	62	0	0	57	73	95	456	0	131	22193	7082	0.334
158.6	12645.4	45907	1.42	45	179	0	23	739	178	1465	34334	843	19	69	267	28119	176	57	93	0	73	556	312	4181	0	855	23	27	0	51	77	40	496	0	35	21781	6747	0.337
158.8	12656.2	45220	1.38	34	204	0	0	675	182	1549	36446	724	22	53	327	25731	156	26	80	21	135	558	325	4441	72	833	125	0	37	74	176	227	399	0	159	21987	6787	0.330
159	12667	44917	1.45	45	187	0	19	787	242	1604	35201	844	39	34	361	24748	164	90	89	36	133	516	353	4462	0	659	37	29	0	91	53	66	418	37	139	21645	7000	0.334
159.2	12677.8	44710	1.54	17	172	0	8	687	171	1445	35549	866	84	55	332	25556	116	78	100	0	34	563	226	4397	0	723	0	20	0	110	0	54	464	0	92	21113	6707	0.334
159.4	12688.6	45465	1.42	35	193	0	19	749	157	1468	35594	874	30	14	254	28516	109	99	111	10	128	551	297	4399	0	711	35	12	0	83	59	126	490	0	134	21056	6848	0.335
159.6	12699.4	44944	1.3	28	174	0	0	676	153	1522	36403	832	43	34	285	24249	140	104	108	0	99	561	276	4759	0	783	49	0	0	33	112	59	436	0	82	21461	7060	0.335
159.8	12710.2	44465	1.29	33	234	0	9	779	215	1518	36006	844	47	84	248	24445	175	50	77	0	81	535	393	4635	0	720	68	0	35	117	139	167	501	0	37	21575	7029	0.330
160	12721	44555	1.39	31	196	0	8	673	203	1517	36561	840	78	58	277	24806	143	53	51	0	70	509	283	4682	0	798	11	4	0	59	69	185	395	32	27	21187	6777	0.331
160.2	12731.8	45161	1.47	48	181	0	0	717	188	1517	37153	841	22	73	239	26050	129	88	75	0	84	565	291	4512	0	854	109	0	0	99	120	139	474	23	122	21280	6914	0.333
160.4	12742.6	45255	1.94	34	215	0	42	676	194	1643	37332	927	36	106	266	25065	148	59	92	0	148	530	248	4639	0	579	71	22	16	44	114	0	336	16	0	21213	6999	0.335
160.6	12753.4	45290	1.47	19	219	0	11	699	203	1548	37818	846	26	58	240	24814	157	87	147	0	53	624	218	4755	0	756	24	35	0	73	67	185	456	0	169	21111	6994	0.332
160.8	12764.2	45343	1.49	42	223	0	0	738	181	1605	38135	838	24	79	271	25458	161	84	149	0	84	592	375	4593	45	942	53	11	0	101	113	52	406	0	39	21873	7017	0.328
161	12775	46255	1.29	60	264	0	0	722	188	1578	38020	939	37	91	277	25987	171	18	46	0	81	410	318	4369	0	756	68	0	35	40	56	164	463	0	0	22310	6961	0.335
161.2	12786	46351	1.31	0	183	0	45	699	169	1507	36453	967	0	65	301	26348	181	74	83	0	118	598	266	4574	0	735	19	17	0	101	151	87	521	12	48	22463	7110	0.335
161.4	12797	44805	1.43	32	187	0	20	712	207	1237	34152	735	0	49	298	22834	139	46	99	9	93	765	262	4499	0	770	78	0	17	84	67	262	454	4	59	22880	6810	0.333
161.6	12808	43215	1.34	18	154	0	0	709	162	1254	32666	736	34	51	244	20149	169	57	107	0	38	659	370	4476	0	665	0	30	0	38	97	60	380	20	103	22255	6894	0.334
161.8	12819	42789	1.41	32	139	0	28	741	218	1234	31934	709	21	11	206	20632	95	5	98	0	152	661	286	4279	0	715	26	23	34	0	106	180	307	45	59	21925	6684	0.331
162	12830	43300	1.34	7	186	0	0	619	202	1312	34715	762	17	36	344	21288	171	29	64	0	86	626	309	4538	0	725	10	40	11	32	108	273	361	0	71	21902	6679	0.331
162.2	12841	44418	1.8	22	189	0	36	716	195	1461	35546	791	25	69	376	23022	180	47	130	0	33	607	228	4395	0	689	77	12	13	23	108	0	440	0	149	21892	6836	0.334
162.4	12852	44609	1.43	27	178	0	6	691	225	1387	35460	826	56	50	364	23582	157	0	86	0	67	599	313	4491	0	614	5	0	17	14	38	229	554	37	94	21492	6846	0.330
162.6	12863	44921	1.45	27	206	0	0	758	200	1579	36750	805	23	56	357	23747	153	29	95	0	11	617	252	4575	0	676	20	18	17	6	29	199	446	11	95	22230	6950	0.327
162.8	12874	44295	1.77	33	135	0	46	723	216	1438	34260	755	46	52	352	23245	147	27	81	0	69	668	323	4438	0	768	62	17	0	13	123	156	465	32	136	21905	6804	0.333
163	12885	44985	1.44	25	191	0	0	704	177	1490	35117	866	27	56	376	25547	118	0	97	0	0	516	308	4349	0	781	66	0	0	24	172	146	448	0	74	21872	6873	0.334
163.2	12896	44690	1.58	41	225	0	0	720	193	1507	34589	859	42	86	388	26556	133	0	63	0	77	511	303	4090	24	781	60	21	4	87	121	61	498	5	125	21086	6600	0.331
163.4	12907	45559	1.46	47	189	0	0	747	174	1488	34445	923	0	49	301	28894	172	58	91	0	121	658	317	4007	43	789	18	0	38	118	110	289	461	0	203	21523	6897	0.332
163.6	12918	44601	1.41	17	211	0	8	732	181	1436	34614	824	30	29	447	26153	190	9	74	14	109	436	360	4353	0	727	37	11	19	79	174	57	451	0	89	21766	7241	0.327
163.8	12929	44774	1.45	14	150	0	0	726	137	1406	32741	905	63	48	460	26349	195	67	100	49	74	441	355	4225	0	869	30	22	0	80	108	68	488	8	68	21466	6953	0.331
164	12940	44438	1.4	27	166	0	31	849	185	1361	31236	777	49	74	471	25532	137	27	77	0	69	463	299	4360	57	762	53	0	0	15	99	69	474	7	0	21758	6961	0.328
164.2	12951	45258	1.43	41	185	0	6	803	210	1493	33452	821	36	58	402	27214	148	0	105	0	96	590	228	4388	0	833	81	5	25	69	126	74	438	0	24	21600	7064	0.331
164.4	12962	45482	1.48	36	179	0	17	803	188	1487	32103	958	54	73	412	29054	134	10	86	0	149	555	265	4402	22	859	5	34	0	47	79	342	484	0	49	21300	6940	0.331
164.6	12973	45105	1.5	9	176	0	0	817	195	1462	32136	861	23	59	356	28706	194	46	157	8	80	541	291	4057	28	951	29	16	0	14	0	285	537	0	105	21913	6863	0.326
164.8	12984	44864	1.47	18	174	0	24	724	187	1425	33398	844	10	36	338	26414	140	45	84	0	76	570	363	4118	0	682	80	0	0	56	68	182	369	0	41	21503	7035	0.329
165	12995	45005	1.41	64	152	0	23	688	245	1456	34455	845	45	58	316	26523	132	23	132	0	58	449	383	4167	0	758	92	0	9	0	55	141	402	23	37	21856	7141	0.333
165.2	13006	45395	1.4	25	174	0	5	696	179	1559	35115	771	19	103	306	27477	139	61	130	0	35	497	269	4268	74	811	40	0	56	51	147	94	347	0	152	21720	7113	0.334
165.4	13017	45130	1.5	42	194	0	9	740	174	1508	34863	857	31	77	321	26577	155	0	119	0	146	491	263	4453	35	809	78	8	59	44	110	146	467	0	155	21736	7115	0.326
165.6	13028	44550	1.85	15	173	0	24	722	195	1523	34191	768	54	114	349	25662	163	15	75	0	120	527	321	4554	0	759	88	0	22	79	70	222	409	0	101	21752	7111	0.325
165.8	13039	44951	1.46	25	206	0	0	712	196	1574	35583	893	61	64	320	26001	197	28	111	0	107	457	354	4625	0	820	74	19	9	117	160	164	397	0	153	21970	7133	0.323
166	13050	45364	1.4	13	175	0	0	680	193	1536	36625	878	60	86	344	26428	122	15	86	0	49	492	349	4593	18	793	50	10	0	66	83	158	328	0	0	21918	7165	0.324
166.2	13061.2	45395	1.53	16	175	0	0	686	182	1604	36481	970	68	28	381	27212	182	73	98	0	0	416	304	4444	53	723	0	31	0	9	0	190	423	0	15	21823	7057	0.322
166.4	13072.4	45359	1.38	48	185	0	0	725	173	1650	36701	969	14	50	357	26329	186	88	98	0	22	541	389	4534	5	793	9	28	0	66	88	95	420	37	186	21847	6973	0.328
166.6	13083.6	45225	1.31	47	207	0	12	684	170	1513	37230	915	49	79	293	25724	157	63	111	0	48	479	245	4559	15	750	79	0	0	72	39	193	370	0	0	21566	6969	0.326
166.8	13094.8	45097	1.34	33	238	0	0	750	182	1542	37533	943	52	49	291	24858	187	84	54	0	25	620	270	4463	0	782	25	10	5	53	30	195	378	14	146	21804	7119	0.328
167	13106	44732	1.47	41	204	0	8	716	175	1542	37013	770	19	53	274	24363	178	64	121	38	72	463	330	4475	0	844	42	6	0	87	49	142	501	44	160	21809	7202	0.327
167.2	13117	45219	1.56	40	201	0	10	745	191	1527	36739	946	16	51	272	24639	164	30	85	0	115	478	310	4622	0	641	0	48	64	76	197	61	384	0	160	21424	7079	0.329
167.4	13128	45575	1.32	49	214	0	0	705	143	1604	37631	961	77	34	297	25061	175	38	142	0	119	557	326	4682	54	735	15	10	68	78	127	23	396	0	157	22428	7253	0.328
167.6	13139	45982	1.46	30	205	0	0	749	177	1638	38767	883	38	33	278	25060	151	58	149	0	29	550	363	4771	0	769	23	22	0	50	147	143	445	5	158	22332	7048	0.327
167.8	13150	45193	1.5	29	179	0	22	750	182	1489	37032	946	0	59	321	24999	182	84	121	14	43	536	268	4726	36	717	34	17	0	100	67	133	461	11	49	22212	7057	0.324
168	13161	45230	1.25	48	189	0	0	702	202	1603	38273	848	50	50	277	24651	154	91	104	15	66	454	320	4622	39	881	65	0	0	70	53	222	465	0	49	21767	7002	0.324
168.2	13172.2	45650	1.39	28	212	0	31	719	205	1663	39099	952	22	85	308	25067	186	125	108	34	89	536	302	4787	102	787	79	0	0	34	79	164	363	7	67	22410	7047	0.324
168.4	13183.4	45357	1.27	19	217	0	5	733	173	1542	37648	977	33	48	319	26176	148	12	81	0	109	600	239	4542	66	817	46	6	27	65	104	311	400	0	47	22616	6871	0.321
168.6	13194.6	45718	1.39	36	200	0	0	639	152	1584	35988	931	5	81	337	27322	162	26	145	0	79	554	307	4568	0	638	27	26	25	70	102	87	500	0	134	22269	6955	0.325
168.8	13205.8	46215	1.41	14	215	0	19	710	205	1602	38190	982	0	59	325	26948	154	60	123	20	98	583	297	4585	55	854	36	28	0	9	109	119	450	0	106	22529	7204	0.326
169	13217	45786	1.92	23	218	0	0	676	183	1608	38731	917	27	90	346	26079	149	74	97	0	86	546	379	4738	0	758	75	7	0	60	128	119	455	0	61	22365	7200	0.324
169.2	13228.2	45677	1.62	24	219	0	0	739	162	1694	38201	977	26	70	325	25385	139	79	111	31	137	616	397	4731	0	621	73	5	0	71	72	203	394	0	148	21687	7265	0.327
169.4	13239.4	45648	1.41	18	203	0	0	702	181	1661	37350	819	69	94	371	26252	161	101	169	34	164	454	430	4505	5	927	73	0	0	75	86	210	425	0	117	22064	7081	0.327
169.6	13250.6	45840	1.49	33	262	0	7	720	171	1758	37615	874	56	78	335	26802	163	25	134	30	134	522	341	4664	0	662	46	17	32	72	125	84	421	0	26	21909	6967	0.327
169.8	13261.8	46011	1.49	38	215	0	0	709	176	1676	38261	1025	47	51	289	26711	138	51	117	0	58	364	308	4563	19	656	34	24	0	52	72	160	491	16	160	22455	7194	0.327
170	13273	46723	1.36	30	231	0	0	669	193	1591	37175	970	33	92	271	28334	170	56	145	7	62	510	365	4510	16	731	57	9	0	10	144	201	373	0	80	22971	7062	0.328
170.2	13284	46137	1.42	36	219	0	29	699	193	1655	36246	922	86	73	308	28210	135	41	62	23	64	505	387	4247	0	766	62	0	0	84	30	197	428	0	144	22887	7117	0.326
170.4	13295	46486	1.35	6	219	0	0	751	162	1571	34014	924	66	47	345	28416	129	0	100	0	9	528	386	4088	0	869	11	5	36	49	56	191	460	0	85	23125	7201	0.329
170.6	13306	46116	1.37	28	228	0	11	692	171	1562	34652	853	61	95	328	28223	92	15	79	0	143	609	317	4112	0	850	41	0	19	43	106	118	413	0	118	22510	6926	0.327
170.8	13317	46592	1.4	27	238	0	7	714	186	1640	36752	889	92	107	367	28048	134	69	110	0	18	519	363	4397	0	864	82	0	0	44	103	156	440	9	187	22578	7183	0.326
171	13328	46240	1.43	21	186	0	18	629	134	1443	35106	876	49	55	326	28861	169	132	107	58	40	561	348	4316	0	886	27	20	0	83	130	190	498	23	101	22525	6984	0.326
171.2	13339	45935	1.75	30	179	0	0	704	175	1574	35743	884	52	104	315	27235	161	67	126	0	147	640	292	4178	0	782	75	6	0	99	48	123	485	0	202	22903	7158	0.326
171.4	13350	45770	1.45	24	198	0	19	648	147	1609	36785	894	57	63	312	27107	129	15	138	0	52	567	323	4129	40	789	55	9	19	80	63	170	449	0	102	22398	7086	0.323
171.6	13361	45824	1.5	22	234	0	8	637	200	1610	37871	856	21	33	261	25399	174	74	180	0	52	503	343	4529	0	819	50	18	0	13	112	165	459	0	212	22726	7300	0.325
171.8	13372	45890	1.3	28	256	0	31	682	174	1675	37585	1003	35	60	347	25613	163	84	115	0	148	576	355	4489	45	796	24	19	0	27	44	222	435	0	138	22283	7248	0.325
172	13383	46080	1.45	35	205	0	0	720	186	1518	35564	1029	56	42	293	27927	173	56	134	0	113	516	234	4430	0	796	35	36	0	46	112	132	507	0	87	22622	6941	0.321
172.2	13394.2	45656	1.4	35	185	0	22	737	170	1555	33597	819	53	58	329	28740	162	68	94	0	16	701	318	4523	93	645	42	34	0	112	76	211	481	24	100	23102	6913	0.320
172.4	13405.4	45778	1.34	36	164	0	0	705	120	1478	35085	837	14	77	288	27584	181	50	85	0	113	511	359	4460	49	898	60	0	10	0	0	140	450	8	105	23113	7057	0.321
172.6	13416.6	45939	1.52	43	181	0	0	759	139	1542	34971	988	0	90	315	27648	188	69	134	0	78	540	350	4394	0	708	32	39	0	32	98	295	534	15	112	23083	7218	0.324
172.8	13427.8	45836	1.47	45	176	0	10	674	166	1657	35433	866	15	78	244	27920	169	51	116	0	133	647	370	4480	0	810	75	0	9	41	120	75	457	0	128	23034	7337	0.323
173	13439	45416	1.4	5	198	0	21	735	173	1555	35676	877	0	64	292	27288	126	58	102	0	63	477	347	4526	15	856	55	27	0	36	20	208	463	0	97	22338	7120	0.322
173.2	13450.2	45588	1.39	12	194	0	0	717	180	1638	35058	937	8	39	297	28938	152	25	68	0	57	562	210	4373	110	813	57	25	0	67	122	107	499	0	101	22399	7075	0.320
173.4	13461.4	46636	1.32	23	208	0	46	746	150	1546	35630	813	63	79	292	31770	197	66	111	12	78	538	489	4397	0	740	90	13	0	45	50	303	633	0	95	22446	7145	0.326
173.6	13472.6	46094	1.47	37	189	0	29	708	152	1507	34476	824	47	33	285	32143	185	54	91	14	45	501	293	4447	97	644	50	0	0	14	41	94	462	0	137	21762	7003	0.323
173.8	13483.8	45602	1.46	20	208	0	46	702	163	1675	36852	828	51	107	297	29389	191	76	141	0	87	520	287	4511	0	740	68	0	11	136	175	102	474	0	77	21992	7193	0.320
174	13495	45644	1.39	28	175	0	36	730	156	1556	36418	827	49	64	245	29341	170	112	75	12	78	571	293	4472	69	689	103	0	0	111	111	146	504	0	72	21894	7168	0.321
174.2	13506.2	44689	1.52	16	188	0	0	667	136	1609	36562	991	38	68	327	26364	158	26	171	0	104	546	365	4477	0	706	5	4	21	66	56	132	433	5	52	21649	6851	0.319
174.4	13517.4	44385	1.43	26	215	0	5	694	134	1611	36285	957	35	19	284	25503	210	129	132	5	163	529	387	4562	43	729	36	8	0	81	29	185	459	31	148	21661	6722	0.319
174.6	13528.6	45481	1.48	20	165	0	4	676	150	1617	36917	900	27	106	313	27005	183	62	87	0	103	501	313	4700	0	900	101	0	0	69	81	160	396	0	131	22115	7393	0.321
174.8	13539.8	45274	1.35	0	204	0	7	707	139	1666	36144	914	33	71	300	26851	208	86	88	0	116	529	317	4650	118	821	36	43	6	75	47	227	435	0	111	22108	7284	0.318
175	13551	45101	1.36	37	194	0	12	672	162	1680	38157	937	54	49	351	26263	141	83	140	11	39	530	332	4755	73	872	39	15	0	93	104	75	324	0	27	21818	7340	0.318
175.2	13562.2	44599	1.35	12	201	0	0	641	145	1625	38141	844	19	69	265	25609	142	39	166	0	11	508	321	4648	0	709	92	0	13	127	99	114	446	0	39	21677	7058	0.314
175.4	13573.4	45485	1.33	47	241	0	35	645	146	1607	38793	938	0	16	280	27127	126	105	99	0	187	479	287	4640	50	671	42	10	0	80	148	221	439	0	184	21791	7022	0.320
175.6	13584.6	45317	1.38	30	201	0	7	754	193	1676	37337	867	38	72	266	26586	150	108	142	43	51	597	370	4781	0	860	55	0	0	77	49	161	452	0	147	21585	7297	0.318
175.8	13595.8	44317	1.48	35	202	0	33	724	174	1580	35995	863	29	92	277	26066	193	17	112	0	61	580	260	4497	21	737	50	6	98	32	85	141	407	0	19	21537	7174	0.316
176	13607	45744	1.58	26	221	0	28	679	192	1678	36421	898	12	79	262	28059	149	30	108	41	97	490	387	4372	0	786	75	0	0	38	74	53	553	0	136	22743	7320	0.319
176.2	13618	46637	1.66	8	214	0	7	754	180	1660	35978	890	31	65	341	28275	174	38	88	0	94	507	434	4418	0	770	55	34	0	31	141	113	494	0	38	23076	7132	0.322
176.4	13629	47425	1.41	45	236	0	0	757	161	1594	36891	997	42	89	280	28994	176	4	135	0	12	491	374	4582	0	801	71	9	0	67	134	193	530	0	163	23402	7244	0.320
176.6	13640	45523	1.39	43	234	0	12	721	160	1711	35412	937	56	41	317	27766	137	64	229	11	44	612	272	4372	109	656	81	8	0	45	97	99	511	0	225	22967	7133	0.315
176.8	13651	45330	1.36	27	213	0	9	675	176	1546	34398	951	33	67	289	26018	140	40	125	0	110	570	324	4373	6	850	34	20	0	116	126	161	448	5	117	22507	7376	0.326
177	13662	45198	1.3	32	192	0	27	767	194	1464	33928	767	46	72	280	25202	148	103	78	0	90	603	311	4561	0	783	52	10	0	96	55	170	451	0	193	22824	7053	0.325
177.2	13673.2	45743	1.42	57	201	0	12	753	141	1585	37495	965	16	79	302	25753	148	36	122	0	0	577	374	4712	8	800	0	43	0	43	37	23	452	0	20	22592	7271	0.324
177.4	13684.4	46120	1.46	20	188	0	0	744	143	1637	36286	954	13	89	293	27019	173	43	139	0	87	551	333	4597	0	788	54	0	25	7	68	124	483	0	62	22892	7214	0.321
177.6	13695.6	46326	1.48	19	211	0	17	812	154	1571	35346	907	62	49	232	29091	138	47	120	0	123	523	290	4605	61	854	46	6	0	46	186	211	549	0	125	22060	7245	0.325
177.8	13706.8	45910	1.27	6	208	0	30	734	144	1492	34876	886	30	53	310	27921	133	0	88	0	24	467	257	4532	0	721	62	0	90	65	53	127	454	0	157	22148	7238	0.326
178	13718	46418	1.34	20	185	0	45	716	169	1530	34823	946	51	48	288	30664	146	0	99	0	152	575	243	4385	0	726	23	0	41	33	44	216	453	0	122	22298	7397	0.327
178.2	13729	45746	1.44	11	208	0	13	724	159	1490	35281	809	55	64	277	27699	163	31	94	35	49	505	393	4361	0	743	64	0	0	93	54	134	435	0	75	22462	7280	0.323
178.4	13740	46383	1.5	37	189	0	12	740	150	1578	34216	896	26	65	300	28159	145	86	105	0	143	452	304	4292	0	743	57	26	0	92	73	237	472	0	95	23098	7200	0.326
178.6	13751	45862	1.45	38	175	0	0	754	164	1498	33870	734	57	61	271	28833	141	45	92	0	78	595	320	4229	0	736	105	0	56	0	146	136	481	0	199	22543	7086	0.325
178.8	13762	46499	1.48	27	183	0	19	706	152	1549	35215	864	22	92	329	28975	135	34	133	0	99	604	277	4298	0	587	63	0	0	33	76	19	474	0	115	22755	7369	0.324
179	13773	46217	1.59	40	166	0	6	721	166	1563	34612	957	47	58	319	28148	174	69	105	0	49	582	349	4484	9	777	49	20	0	28	68	192	518	0	77	22609	6985	0.326
179.2	13784.2	45986	1.4	35	170	0	0	679	137	1479	34802	902	43	34	361	28058	166	0	213	0	95	521	371	4408	0	775	21	0	44	24	127	194	488	0	90	22974	7369	0.321
179.4	13795.4	45960	1.47	26	189	0	0	798	140	1488	32601	941	53	76	375	27896	228	117	84	0	0	588	381	4279	0	826	14	22	0	82	122	218	502	0	17	23406	7408	0.322
179.6	13806.6	44789	1.35	22	188	0	0	762	166	1414	32619	815	49	52	329	24795	139	79	144	0	52	558	328	4524	0	706	0	32	0	58	34	123	420	0	170	23138	7328	0.320
179.8	13817.8	45027	1.57	12	187	0	22	730	148	1487	34587	886	34	47	332	24582	170	69	121	0	132	638	421	4558	0	759	41	20	0	58	176	126	399	14	153	22826	7322	0.323
180	13829	45416	1.33	22	209	0	21	686	142	1634	35354	968	15	74	337	26374	125	36	77	0	159	514	482	4502	24	758	57	0	0	14	80	197	410	0	108	22945	7225	0.322
180.2	13840	44614	1.33	37	200	0	10	743	143	1386	33881	833	71	77	259	25956	187	15	111	0	67	526	400	4549	0	900	78	0	0	77	13	271	417	0	106	22795	7125	0.316
180.4	13851	44529	1.9	16	163	0	35	979	172	1283	30390	851	46	80	291	24188	122	87	112	0	70	640	323	4579	0	750	0	48	0	69	136	111	447	0	117	23099	7352	0.320
180.6	13862	44089	1.4	17	121	0	0	944	142	1299	30724	728	0	65	315	23073	134	87	129	0	75	564	312	4561	0	756	55	0	0	127	192	141	482	0	101	22803	7158	0.321
180.8	13873	44653	1.41	47	208	0	0	643	147	1547	36945	865	8	62	281	23113	111	47	93	0	112	560	368	4654	141	765	50	19	19	0	18	137	430	20	25	22770	7433	0.321
181	13884	44856	1.5	38	187	0	10	633	164	1604	37369	917	46	61	292	24147	154	47	108	0	99	566	342	4563	0	759	52	5	0	80	95	203	352	0	195	22425	7309	0.319
181.2	13895.2	44489	1.46	36	241	0	28	670	148	1592	37057	900	75	53	378	23826	161	63	121	0	73	577	433	4708	0	608	44	22	7	95	109	79	460	0	146	22334	7324	0.317
181.4	13906.4	44375	1.52	30	232	0	50	808	178	1545	35844	908	76	50	322	23467	138	37	54	0	17	451	318	4527	0	761	27	38	25	57	119	95	399	0	136	22162	6847	0.319
181.6	13917.6	44356	1.44	16	166	0	11	864	131	1424	33129	817	8	55	274	22990	163	94	112	0	115	586	331	4670	0	793	19	20	0	57	146	178	415	25	0	22939	7303	0.319
181.8	13928.8	46381	1.33	50	171	0	107	721	145	1381	33144	754	60	16	288	33601	177	58	136	0	70	603	296	4634	0	946	38	0	20	80	149	221	560	0	106	22288	7430	0.321
182	13940	44433	1.3	31	196	0	37	620	155	1446	36807	762	23	23	255	24761	156	34	115	0	91	501	290	4672	0	743	71	0	0	38	62	239	410	0	117	21779	7175	0.316
182.2	13951.2	44257	1.63	41	210	0	0	692	125	1513	38036	870	35	60	327	22673	147	138	123	22	0	646	250	4722	0	822	55	21	0	42	59	164	369	0	69	22626	7367	0.315
182.4	13962.4	44290	1.48	64	216	0	25	672	149	1486	38716	954	29	76	301	23105	179	76	86	0	47	565	330	4775	20	791	0	26	0	41	88	125	422	21	36	22232	7269	0.314
182.6	13973.6	44394	1.45	22	241	0	17	670	165	1383	37295	890	46	23	285	23371	115	47	50	0	76	489	286	4685	0	684	29	26	0	80	80	165	391	0	120	22529	7269	0.315
182.8	13984.8	44978	1.37	23	189	0	0	664	148	1428	36660	876	0	44	366	23832	155	32	129	0	126	608	406	4710	21	774	82	0	7	55	60	286	448	6	10	23231	7092	0.318
183	13996	44908	1.48	35	185	0	13	677	157	1529	36788	899	19	52	342	24312	194	49	102	0	20	572	279	4717	0	689	33	24	0	7	16	0	464	43	103	22749	7274	0.317
183.2	14007	44415	1.43	32	229	0	19	678	175	1459	36387	809	52	58	314	23358	142	60	89	0	117	541	383	4741	0	614	61	0	0	0	68	138	395	11	10	23028	7418	0.314
183.4	14018	44826	1.57	8	194	0	27	767	159	1398	35644	842	16	41	287	23407	174	13	57	0	0	474	287	4676	104	723	48	28	18	100	133	149	408	0	112	22993	7236	0.317
183.6	14029	44744	1.37	23	186	0	10	687	165	1511	35447	837	68	68	287	24186	161	70	53	0	134	632	307	4649	67	783	41	0	0	71	0	236	379	0	110	22819	7254	0.318
183.8	14040	45725	1.45	29	225	0	22	715	168	1616	38203	847	50	46	399	25071	190	111	102	0	70	635	348	4670	19	794	62	5	0	37	25	236	443	34	59	23014	7486	0.315
184	14051	44255	1.66	0	167	0	19	742	178	1322	33468	732	39	85	327	22808	140	38	119	0	53	556	254	4477	0	700	85	0	0	34	54	199	396	0	44	23585	7295	0.315
184.2	14062.2	44274	1.76	40	157	0	31	876	195	1311	32242	859	7	53	309	22334	135	52	100	0	101	577	365	4499	0	665	0	49	0	57	80	149	371	0	129	23813	7272	0.319
184.4	14073.4	44985	1.49	27	208	0	0	674	146	1548	36326	845	50	64	308	23827	132	63	47	0	99	640	318	4380	0	838	45	0	0	48	95	0	417	0	58	23081	6856	0.320
184.6	14084.6	44737	1.45	42	190	0	7	710	141	1470	34816	813	0	74	355	24064	130	59	109	31	56	599	303	4321	0	711	58	0	0	34	125	120	419	18	183	23048	6987	0.321
184.8	14095.8	45395	1.42	0	212	0	21	699	139	1508	35629	805	37	40	305	25733	175	58	104	0	66	567	310	4282	0	679	52	0	0	110	76	127	446	0	67	23074	7255	0.319
185	14107	45740	1.36	22	209	0	12	670	134	1569	36558	914	14	63	288	25920	161	23	88	0	76	661	338	4446	0	720	50	0	0	53	35	86	389	0	0	23200	7248	0.319
185.2	14118.2	45850	1.37	23	210	0	14	721	172	1531	36591	871	42	72	343	25296	161	30	58	0	96	603	332	4544	19	683	37	0	0	0	106	99	423	0	86	23385	7405	0.319
185.4	14129.4	46981	1.54	23	200	0	22	742	156	1635	37242	811	0	70	398	26944	168	66	82	0	99	640	300	4565	0	796	109	7	46	80	147	0	393	17	145	23942	7435	0.319
185.6	14140.6	45763	1.49	29	212	0	19	735	179	1609	36099	952	45	52	355	25885	142	44	63	16	66	685	301	4661	97	758	56	0	0	36	13	312	345	0	143	23192	7335	0.318
185.8	14151.8	45181	1.43	12	179	0	19	731	178	1431	37979	810	38	46	273	22519	161	84	104	0	99	621	364	4683	18	788	10	26	0	24	96	0	401	0	101	23292	7281	0.319
186	14163	45359	1.46	63	178	0	0	770	187	1459	37818	747	65	66	305	22046	165	25	134	0	53	754	377	4854	0	742	39	10	11	68	148	195	402	0	231	23063	7146	0.322
186.2	14174.2	45201	1.36	26	222	0	0	704	148	1491	36824	784	47	39	249	23804	169	60	96	0	61	556	275	4952	41	660	43	0	0	105	5	192	438	0	48	22729	7365	0.320
186.4	14185.4	45453	1.58	23	195	0	29	733	169	1559	36502	842	16	58	331	24203	92	18	94	24	58	529	361	4586	35	858	46	16	18	61	115	218	427	20	135	23050	7252	0.323
186.6	14196.6	46331	1.43	27	226	0	0	754	180	1610	35996	878	27	58	320	24806	201	62	107	0	148	582	354	4541	0	826	43	41	0	50	97	214	468	0	28	23060	7346	0.326
186.8	14207.8	46125	1.32	35	225	0	15	685	163	1583	35768	915	20	56	342	25240	143	19	100	40	60	620	243	4517	68	889	30	39	0	64	70	182	407	8	25	23607	7676	0.325
187	14219	46054	1.33	7	201	0	7	718	161	1631	36714	901	50	8	368	24603	160	22	107	11	107	561	310	4710	10	835	71	0	0	0	76	164	474	0	82	23321	7483	0.322
187.2	14230.2	45714	1.55	51	198	0	23	799	162	1528	35821	765	0	57	262	24713	192	113	98	0	146	614	307	4736	0	901	67	8	0	86	102	274	370	19	154	23005	7296	0.323
187.4	14241.4	45228	1.37	8	194	0	24	727	152	1407	34836	854	63	47	301	23604	191	86	156	0	20	608	231	4797	0	690	32	12	0	52	147	126	488	0	99	22973	7063	0.323
187.6	14252.6	45819	1.36	22	223	0	0	754	159	1592	35908	1036	28	57	295	24224	153	77	107	0	92	523	207	4544	0	842	0	39	14	62	43	4	508	0	143	23328	7180	0.325
187.8	14263.8	46244	1.43	23	214	0	0	716	144	1544	36623	845	8	49	297	23955	180	60	175	0	69	604	330	4740	0	817	42	0	0	7	59	233	458	0	188	23444	7406	0.325
188	14275	46512	1.41	33	229	0	11	797	177	1403	34545	951	0	43	456	24871	162	37	125	5	78	658	307	4563	41	696	72	25	0	127	119	313	458	0	92	24114	7300	0.327
188.2	14286.4	46411	1.44	46	169	0	14	778	164	1446	33573	857	0	42	367	25707	165	51	98	0	122	616	286	4440	5	828	66	0	0	40	92	147	422	0	119	23948	7322	0.325
188.4	14297.8	46634	1.44	40	179	0	12	693	160	1469	33968	847	61	74	355	25893	130	31	113	0	173	604	300	4543	0	857	46	0	9	127	127	66	465	0	115	23728	7437	0.326
188.6	14309.2	47705	1.55	46	199	0	57	815	157	1458	33366	920	76	37	362	28850	130	58	85	0	52	699	369	4534	0	702	20	29	0	49	113	146	469	0	94	24381	7525	0.328
188.8	14320.6	48125	1.36	33	194	0	0	794	136	1509	32781	806	13	31	402	28037	174	0	123	0	56	611	344	4155	0	762	27	17	25	0	108	138	450	0	53	24965	7389	0.328
189	14332	47726	1.46	13	208	0	11	785	126	1384	32948	808	49	53	329	27132	157	70	102	0	115	682	224	4299	0	640	43	5	0	4	23	68	452	0	154	24812	7557	0.326
189.2	14343	46324	1.31	32	178	0	0	797	158	1460	33664	756	0	64	288	24623	162	44	50	0	109	662	326	4292	47	801	70	0	0	41	110	231	441	0	109	24473	7288	0.324
189.4	14354	46741	1.38	49	204	0	75	854	165	1417	33271	819	35	78	252	26835	136	77	97	0	11	636	311	4466	90	645	45	0	0	0	105	204	438	0	91	23844	7307	0.324
189.6	14365	47011	1.42	14	171	0	40	846	185	1416	33927	850	24	49	242	28545	138	19	110	0	67	690	361	4543	0	661	0	21	0	47	89	161	443	0	0	24278	7338	0.322
189.8	14376	46611	1.38	10	174	0	9	790	163	1433	32119	696	74	41	334	25859	178	61	102	14	88	752	348	4526	0	810	98	0	0	60	41	175	457	0	109	24886	7233	0.325
190	14387	46403	1.31	28	143	0	19	829	170	1376	32535	753	17	67	304	25708	171	80	25	0	69	643	246	4343	5	736	76	0	0	75	72	121	442	0	165	24111	7210	0.326
190.2	14398.2	46280	1.37	30	179	0	48	786	152	1334	31472	769	24	45	298	26406	143	34	77	0	85	702	380	4242	49	700	21	13	0	35	160	161	489	0	79	24568	7123	0.324
190.4	14409.4	47196	2.13	7	148	0	27	860	145	1370	32202	819	82	53	345	27493	97	0	82	0	100	759	314	4411	0	672	37	27	23	0	110	192	404	0	0	24385	7342	0.328
190.6	14420.6	46362	1.48	39	173	0	16	839	182	1304	30672	847	27	106	292	27471	197	76	107	0	78	679	337	4183	7	685	6	38	0	42	115	176	430	0	67	24041	7267	0.327
190.8	14431.8	45711	1.33	31	158	0	22	703	141	1354	30757	764	15	88	300	27327	197	85	119	0	68	613	337	4162	0	702	11	23	0	42	86	29	526	0	0	23669	7108	0.324
191	14443	46301	1.46	55	207	0	31	758	127	1425	34067	841	52	34	293	25033	176	91	86	0	108	629	312	4471	0	690	45	0	0	81	141	175	336	0	82	23621	7068	0.328
191.2	14454.4	45733	1.41	23	181	0	31	768	157	1476	34906	806	29	50	307	24220	156	45	89	0	129	590	337	4507	7	776	28	23	0	0	51	109	462	6	16	23595	7049	0.322
191.4	14465.8	45531	1.39	45	210	0	0	711	149	1425	35383	817	22	112	314	23354	188	74	45	0	69	621	315	4582	0	727	67	0	0	96	46	126	426	0	7	23639	7326	0.323
191.6	14477.2	45423	1.46	23	228	0	6	778	151	1486	36608	780	0	67	259	22718	148	0	121	0	119	709	267	4758	0	749	82	0	20	67	129	163	402	5	134	23739	7411	0.320
191.8	14488.6	45271	1.45	54	172	0	0	714	134	1351	37259	789	11	65	294	22235	164	38	86	0	175	699	273	4715	56	722	43	14	29	51	50	222	390	15	87	23538	7472	0.321
192	14500	45886	1.44	40	205	0	16	725	132	1513	38585	894	39	58	310	22420	179	75	111	0	60	673	293	4902	0	717	0	46	0	36	183	174	494	0	108	23714	7348	0.317
192.2	14509.4	45570	1.51	25	207	0	10	792	173	1540	37639	701	16	64	318	22648	137	0	95	0	99	734	315	4749	0	724	74	0	5	27	97	167	317	0	150	23614	7130	0.318
192.4	14518.8	45991	1.5	20	223	0	16	739	149	1569	36124	908	47	56	285	23015	161	59	73	12	47	537	339	4656	8	875	32	18	0	40	86	143	378	13	115	23913	7087	0.323
192.6	14528.2	45253	1.61	28	173	0	35	798	159	1425	35480	729	58	30	314	22300	160	84	108	0	50	725	390	4494	42	832	66	0	0	21	71	179	340	0	64	23929	7307	0.319
192.8	14537.6	46176	1.54	32	201	0	20	789	136	1500	35546	789	0	51	299	23788	172	44	102	0	95	631	321	4275	44	764	37	47	11	40	41	88	409	21	50	24298	7476	0.323
193	14547	47241	1.65	42	223	0	45	760	179	1536	34528	874	17	97	315	27113	135	113	86	0	79	597	216	3936	0	700	39	16	0	29	95	46	441	0	35	24520	7310	0.324
193.2	14555.4	46618	1.41	55	198	15	7	774	151	1443	32475	819	11	103	342	27702	138	93	132	9	64	623	437	3970	0	832	32	5	0	111	146	258	489	0	114	24451	7313	0.322
193.4	14563.8	47299	1.64	33	225	0	4	773	141	1493	34524	759	64	72	347	26704	166	41	147	0	118	693	278	4457	0	761	71	21	9	22	62	0	433	0	20	23957	7297	0.327
193.6	14572.2	47624	1.5	11	176	0	0	775	136	1368	32521	783	49	79	279	28452	150	27	61	34	71	701	232	4286	8	800	17	8	12	86	110	150	533	0	87	24748	7416	0.324
193.8	14580.6	47414	1.44	31	191	0	28	839	160	1328	29210	765	56	71	337	28969	174	100	108	0	68	638	337	4007	0	698	34	22	0	37	72	274	472	6	144	25248	7565	0.327
194	14589	47169	1.48	29	146	0	0	945	124	1269	26870	706	27	46	348	30039	158	34	19	0	141	618	325	3653	0	798	32	23	0	0	98	289	491	0	96	24818	7161	0.327
194.2	14597.4	47250	1.36	29	152	0	29	940	169	1278	27207	728	16	67	294	30180	176	54	54	0	75	651	261	4098	51	682	57	0	0	18	90	283	506	23	62	24430	7349	0.328
194.4	14605.8	47366	1.59	35	160	0	7	909	143	1457	30170	739	46	72	370	28732	152	31	24	0	57	602	327	4148	42	612	101	0	0	55	87	226	446	0	58	24835	7139	0.322
194.6	14614.2	47496	1.36	19	191	0	0	779	126	1496	34359	783	41	36	326	26804	145	20	61	0	129	599	405	4444	0	833	29	31	6	45	117	191	420	0	107	24591	7667	0.323
194.8	14622.6	46284	1.47	36	173	0	26	874	163	1370	31897	858	37	77	299	25792	154	38	79	0	88	560	284	4277	0	738	0	26	25	0	64	78	422	0	125	24482	7350	0.324
195	14631	45262	1.49	20	168	0	6	778	164	1355	31305	757	0	96	290	25035	170	53	123	0	106	571	341	4265	0	886	41	0	0	56	151	102	424	19	86	24150	7226	0.323
195.2	14639.2	46174	1.47	21	133	0	0	792	131	1472	32540	738	47	43	313	25665	168	53	96	0	108	647	369	4303	0	755	57	0	0	32	76	177	472	0	97	24277	7359	0.321
195.4	14647.4	47570	1.38	56	179	0	6	959	149	1379	33158	855	37	29	274	26620	120	32	57	0	87	648	334	4559	80	808	48	0	0	0	44	199	471	5	80	24459	7649	0.326
195.6	14655.6	48862	1.58	16	205	0	26	878	146	1654	33679	816	0	87	314	30710	117	37	35	22	147	686	360	4233	24	816	102	0	0	81	50	208	599	0	191	24506	7144	0.330
195.8	14663.8	48030	1.38	24	208	0	0	853	176	1540	32025	942	20	50	319	29564	208	85	64	24	83	764	298	4175	0	595	0	54	0	110	181	216	473	0	91	24058	7408	0.330
196	14672	47076	1.51	28	191	0	16	732	166	1377	29295	846	61	40	342	29514	205	62	59	5	33	646	264	4107	41	642	0	50	0	59	122	27	525	0	73	24395	7349	0.327
196.2	14680.2	45890	1.5	27	166	6	4	811	192	1365	27708	776	15	40	371	28582	172	13	70	0	0	636	322	4013	0	712	25	23	0	29	55	223	557	19	52	24104	7021	0.325
196.4	14688.4	45331	1.46	19	170	0	0	707	152	1379	30126	756	40	43	359	26668	162	63	21	0	25	627	331	4187	0	714	34	23	0	0	100	265	408	0	156	24296	7235	0.322
196.6	14696.6	45481	1.4	27	138	0	0	750	171	1415	30722	792	23	70	296	25245	152	96	109	19	53	622	342	4311	0	711	46	0	0	82	95	65	402	0	83	24444	7357	0.320
196.8	14704.8	44720	1.57	7	145	0	11	708	162	1335	31740	816	50	48	291	23790	122	76	115	5	171	703	276	4220	45	705	30	21	0	25	34	108	404	12	102	23708	7261	0.317
197	14713	45966	1.33	42	195	0	38	696	138	1403	32081	764	34	66	258	25080	156	93	123	0	26	676	246	4466	106	663	43	0	0	67	133	274	437	0	27	24290	7188	0.324
197.2	14721	46232	1.52	29	206	0	21	761	162	1498	34613	781	18	63	254	24949	168	82	108	0	56	616	284	4454	0	759	31	8	0	32	137	57	400	0	24	24072	7316	0.321
197.4	14729	45676	1.62	22	168	0	20	766	167	1521	34633	780	54	55	281	23359	161	53	137	0	25	647	282	4642	0	746	64	17	0	45	58	212	407	0	93	23878	7216	0.321
197.6	14737	45490	1.28	57	153	0	17	762	178	1400	34840	830	58	11	286	24001	168	68	151	0	100	662	309	4685	0	674	25	0	7	63	57	113	402	0	139	23626	7432	0.319
197.8	14745	44930	1.38	29	205	0	0	731	142	1352	33485	839	45	59	285	22263	195	0	159	0	84	625	235	4652	94	671	32	0	51	41	65	200	439	0	42	23735	7158	0.321
198	14753	45265	1.36	29	210	0	0	762	194	1482	35818	839	8	62	281	22334	157	88	97	8	31	626	396	4736	0	771	29	10	0	0	78	102	351	0	30	24226	7328	0.317
198.2	14761.2	46361	1.54	28	216	0	24	802	132	1507	35941	859	33	99	293	23893	157	109	126	0	54	639	293	4470	0	740	34	14	0	82	69	37	373	0	0	24005	7338	0.322
198.4	14769.4	45092	1.44	54	182	0	4	816	179	1416	32745	751	37	38	324	23812	180	112	119	0	121	570	389	4423	0	760	54	0	0	54	147	62	489	19	180	23736	7341	0.317
198.6	14777.6	45791	1.47	34	155	0	30	733	167	1545	33842	819	54	78	349	25719	165	64	100	0	79	580	286	4280	8	767	37	14	20	39	133	104	402	0	93	23520	7365	0.322
198.8	14785.8	46147	1.47	20	178	0	0	731	147	1545	33303	908	69	44	390	26673	182	49	46	0	18	504	348	4292	13	706	17	9	12	53	140	174	533	0	114	23691	7233	0.324
199	14794	47088	1.66	29	200	0	38	721	150	1621	35066	843	88	53	345	27609	159	36	40	0	93	596	357	4466	0	645	81	10	0	0	125	130	465	0	31	23764	7265	0.324
199.2	14802.2	46919	1.43	20	202	0	18	712	196	1542	35056	916	10	81	336	29095	134	47	128	0	82	553	374	4311	43	692	49	10	0	57	121	41	479	7	98	23495	7309	0.323
199.4	14810.4	45895	1.36	56	196	0	38	669	188	1568	33454	928	21	32	306	27957	204	20	88	0	81	588	268	4172	76	697	18	10	0	0	49	129	505	0	95	23182	7139	0.324
199.6	14818.6	45953	1.31	28	135	0	0	864	127	1323	27185	695	58	30	279	28495	129	93	98	0	0	569	306	4093	0	659	75	0	0	57	0	193	475	0	111	24542	7114	0.323
199.8	14826.8
200	14835
200.2	14843
200.4	14851
200.6	14859
200.8	14867
201	14875
201.2	14882.8
201.4	14890.6
201.6	14898.4
201.8	14906.2
202	14914
202.2	14922
202.4	14930
202.6	14938
202.8	14946
203	14954
203.2	14961.8
203.4	14969.6
203.6	14977.4
203.8	14985.2
204	14993
204.2	15000.8
204.4	15008.6
204.6	15016.4
204.8	15024.2
205	15032
205.2	15039.6
205.4	15047.2
205.6	15054.8
205.8	15062.4	43898	1.4	40	198	0	0	656	143	1493	31336	878	44	44	270	25081	127	9	84	0	27	520	278	4267	151	728	0	35	15	24	95	248	427	0	43	21916	6863	0.333
206	15070	44594	1.52	41	164	0	14	686	171	1507	35925	863	50	51	282	23770	150	114	92	21	27	567	351	4499	0	672	0	25	0	55	96	50	402	0	85	21402	6773	0.330
206.2	15077.6	45147	1.4	39	199	0	30	749	181	1574	35853	848	98	66	306	25264	204	123	160	22	103	565	376	4510	0	820	15	18	0	87	51	60	528	0	79	21716	6872	0.328
206.4	15085.2	46083	1.45	32	205	0	38	785	203	1473	30956	870	39	100	286	31329	154	62	117	12	81	538	302	4279	0	697	50	0	0	66	42	100	506	0	159	22154	6970	0.329
206.6	15092.8	45732	1.4	27	194	0	9	809	183	1544	29168	891	45	73	331	31127	187	76	53	0	150	540	382	3968	17	772	40	0	0	75	61	37	485	0	155	22354	6873	0.328
206.8	15100.4	46404	1.3	42	200	0	40	796	171	1483	30313	855	49	63	347	31477	168	84	90	0	87	519	292	3804	0	713	34	29	0	0	110	248	541	20	101	22814	6674	0.330
207	15108	46872	1.47	29	215	0	13	756	207	1446	28931	803	34	39	298	34328	119	35	123	0	101	627	395	3667	0	765	46	19	0	23	135	174	484	12	27	22843	6914	0.327
207.2	15115.8	46233	1.44	22	180	0	0	803	158	1446	28928	768	68	95	330	32044	169	54	0	0	0	512	481	3817	106	787	45	0	0	26	111	129	492	0	120	23091	6819	0.325
207.4	15123.6	46119	1.38	35	201	0	53	747	184	1495	29942	735	47	45	304	30671	147	23	89	0	0	555	310	3921	0	649	87	12	20	23	92	248	553	0	162	22838	6720	0.328
207.6	15131.4	45719	1.5	23	187	0	0	764	217	1589	32230	832	30	102	314	28144	163	36	24	0	65	617	321	4147	0	661	62	17	0	72	25	162	465	0	43	22825	6844	0.325
207.8	15139.2	45441	1.65	27	208	0	50	719	202	1600	33345	866	69	65	346	26593	179	75	88	0	120	571	397	4223	0	716	97	0	0	0	119	140	395	0	0	23311	7060	0.322
208	15147	45360	1.43	21	191	0	10	791	212	1476	32199	753	14	37	248	27023	156	0	62	0	65	536	340	3918	0	692	64	10	19	12	144	249	409	0	110	23278	6855	0.325
208.2	15154.6	44658	1.49	36	178	0	28	824	187	1415	30009	816	44	51	322	27562	170	95	66	29	118	522	357	3789	0	589	0	52	0	31	119	237	470	0	36	22369	6794	0.321
208.4	15162.2	43696	1.29	22	174	0	35	743	218	1305	29537	744	17	11	299	24808	161	93	116	0	92	545	331	3934	14	643	0	36	0	72	142	171	365	0	177	22325	6694	0.325
208.6	15169.8	43531	1.58	28	154	0	0	733	218	1309	30215	728	0	54	299	24660	166	97	121	0	69	583	311	3994	64	845	30	19	0	98	76	161	421	0	32	22254	6559	0.325
208.8	15177.4	43511	1.38	30	165	0	13	698	213	1419	31753	835	64	0	407	24536	193	75	121	0	40	593	223	4027	12	740	0	34	10	16	37	110	485	0	149	21970	6616	0.327
209	15185	43742	1.34	6	175	0	21	675	176	1454	32541	781	57	64	258	25229	157	77	86	0	77	567	288	4156	35	764	33	0	0	24	123	137	452	0	0	21872	6509	0.323
209.2	15192.6	44147	1.43	50	202	0	50	667	184	1517	33411	729	37	80	248	24285	151	53	148	0	43	547	274	4335	9	724	49	0	8	100	31	154	500	0	11	22932	6879	0.320
209.4	15200.2	44097	1.31	39	162	0	0	716	155	1392	33968	780	48	69	230	23557	178	36	70	0	61	573	336	4403	62	690	36	15	0	37	43	161	483	0	20	22236	7072	0.322
209.6	15207.8	44378	1.37	27	208	0	0	719	173	1439	33172	887	37	37	286	22871	163	81	52	0	81	640	295	4582	21	747	10	0	0	54	40	174	392	18	0	22584	6723	0.326
209.8	15215.4	44272	1.44	31	144	0	0	769	198	1412	34857	725	37	32	266	21297	171	58	127	0	122	656	166	4546	12	788	12	21	14	0	10	165	399	0	0	22646	6865	0.326
210	15223	44559	1.37	23	171	0	21	711	178	1414	34100	819	51	61	279	22921	155	54	116	43	60	677	329	4468	0	707	0	34	0	95	55	127	364	25	0	22587	6646	0.326
210.2	15230.4	44990	1.58	45	175	0	16	721	185	1385	34967	829	49	77	412	23472	190	11	107	0	62	543	248	4598	22	856	60	16	0	50	76	34	444	17	25	23465	7072	0.327
210.4	15237.8	44957	1.38	46	171	0	13	740	184	1573	36207	746	38	102	269	22555	183	37	136	0	82	616	262	4752	0	582	86	0	6	73	52	89	431	10	5	22549	7029	0.327
210.6	15245.2	45262	1.47	40	217	0	10	739	227	1477	34161	860	32	12	275	24921	105	0	140	0	0	602	237	4547	0	602	17	27	72	46	58	232	415	19	185	22266	6914	0.329
210.8	15252.6	46356	1.31	42	193	0	7	738	164	1610	32198	831	42	74	301	28472	170	100	117	0	104	594	368	4166	0	627	9	14	0	90	87	136	492	0	19	23159	6950	0.331
211	15260	46876	1.65	37	193	0	31	772	214	1554	29977	809	45	66	259	30514	182	46	103	0	92	605	355	3791	0	697	38	5	68	0	93	131	526	13	100	23420	6886	0.329
211.2	15267.6	46601	1.49	20	172	0	23	783	189	1618	32048	766	31	71	269	29467	139	37	78	0	98	591	300	3898	0	778	39	21	0	45	193	75	508	0	165	23912	7144	0.328
211.4	15275.2	46325	1.23	29	190	0	8	737	211	1405	33772	854	14	44	339	28237	157	30	110	0	79	647	338	4002	0	696	50	0	13	46	62	78	451	0	110	23318	6973	0.329
211.6	15282.8	45578	1.49	10	169	0	33	707	180	1469	33511	820	45	70	313	25998	157	27	92	24	121	677	260	4120	21	695	45	0	0	76	101	202	487	60	145	23169	6959	0.329
211.8	15290.4	44761	1.53	48	155	0	0	727	207	1483	34529	795	30	33	263	24015	163	35	44	0	39	650	422	4282	0	773	57	0	0	13	19	95	266	48	116	22793	7006	0.323
212	15298	44764	1.54	9	195	0	29	750	161	1464	33740	867	49	46	311	24823	167	52	35	0	63	525	287	4262	0	752	31	21	0	44	27	75	410	0	66	22015	6749	0.328
212.2	15305.6	44693	1.28	38	203	0	0	766	156	1335	34320	797	13	55	357	23273	175	21	108	0	37	652	265	4397	0	670	34	17	0	0	108	116	384	0	0	22536	6988	0.326
212.4	15313.2	44903	1.27	28	179	0	0	747	170	1437	32223	768	24	27	324	23587	193	44	105	0	89	673	235	4335	0	727	35	9	24	85	18	237	339	0	70	22990	7046	0.330
212.6	15320.8	44565	1.34	39	196	0	24	749	211	1473	31902	910	15	76	259	23839	170	114	54	0	33	564	359	4301	0	795	40	18	0	57	97	73	401	8	20	22629	7045	0.326
212.8	15328.4	45281	1.35	44	244	0	5	774	175	1399	33522	812	30	59	256	24430	153	0	140	0	47	625	380	4372	0	867	41	10	33	24	130	212	358	16	109	22650	6949	0.328
213	15336	45269	1.57	31	216	0	11	762	152	1500	33880	787	47	66	262	24809	145	55	135	0	88	560	356	4222	0	669	49	29	0	8	131	94	435	0	127	22847	7081	0.329
213.2	15343.4	45763	1.34	16	183	0	8	736	149	1531	32866	965	45	36	249	27761	145	12	123	0	95	531	354	4079	0	847	0	42	17	70	152	39	380	0	48	23121	7095	0.329
213.4	15350.8	45318	1.22	14	202	0	0	722	166	1462	35565	852	23	81	261	22832	197	58	134	0	63	649	201	4588	18	718	90	0	0	75	125	50	464	0	109	22854	7115	0.332
213.6	15358.2	44639	1.31	36	197	0	45	731	198	1424	33079	750	66	38	266	23097	203	50	65	0	112	667	444	4637	52	815	46	16	4	69	116	235	460	21	30	22626	7042	0.328
213.8	15365.6	44861	1.29	32	218	0	0	767	169	1490	32924	795	45	73	312	25870	131	0	119	0	108	686	295	4303	18	699	55	0	56	0	78	269	341	0	114	22254	7109	0.327
214	15373	45351	1.27	35	186	0	0	735	164	1522	33243	800	72	64	334	26841	136	12	64	0	67	552	361	4271	23	826	42	8	83	13	182	126	414	0	113	22475	6939	0.329
214.2	15380.6	46015	1.33	54	216	0	0	691	169	1595	34480	953	20	64	344	26792	167	74	99	0	63	617	290	4323	0	740	18	13	0	30	72	168	370	0	92	22817	6962	0.330
214.4	15388.2	45611	1.4	31	206	0	17	718	166	1600	34543	925	36	69	293	26362	148	8	117	0	89	487	284	4347	0	722	49	0	39	5	69	103	371	0	78	22630	6978	0.327
214.6	15395.8	45762	1.42	43	168	0	0	775	173	1536	34090	902	77	101	341	26024	209	110	66	44	46	646	316	4424	10	684	57	12	0	65	29	199	487	0	34	23146	7352	0.329
214.8	15403.4	45675	1.38	35	160	0	0	716	145	1578	35379	862	65	44	289	24730	144	94	96	0	30	639	336	4471	0	700	72	0	0	61	71	49	482	0	38	22531	7077	0.330
215	15411	45996	1.4	0	223	0	13	667	204	1628	35350	864	28	59	303	25384	188	31	90	22	107	551	357	4409	23	813	40	20	0	73	81	123	485	0	0	22887	6924	0.329
215.2	15418.6	45655	1.35	31	195	0	12	693	151	1621	35544	905	38	59	278	25306	187	71	89	9	144	687	302	4516	0	853	66	0	0	126	108	233	448	0	45	22707	7063	0.327
215.4	15426.2	45789	1.47	28	183	0	19	683	165	1635	36409	918	79	49	318	24577	197	76	60	0	31	615	196	4365	0	685	0	28	0	34	52	50	462	38	103	22674	7142	0.331
215.6	15433.8	46260	1.57	24	209	0	5	773	167	1629	37453	850	38	5	243	24045	132	79	94	0	45	600	367	4653	0	725	18	12	0	49	65	251	475	0	99	22947	7155	0.329
215.8	15441.4	46125	1.47	17	176	0	11	773	161	1579	37845	917	36	38	285	23131	159	66	104	0	105	585	275	4564	0	811	42	16	36	48	80	141	499	42	0	22907	7028	0.331
216	15449	45573	1.58	15	203	0	0	764	185	1457	36845	801	18	49	281	23360	122	31	70	0	103	625	289	4466	39	658	53	0	0	33	116	128	439	0	156	22622	7116	0.326
216.2	15456.4	45269	1.44	42	171	0	0	750	154	1534	36235	785	38	95	294	22699	206	16	126	0	32	695	386	4471	0	788	67	0	29	73	17	229	423	0	0	22774	7018	0.326
216.4	15463.8	45196	1.49	7	219	0	18	795	204	1385	36319	764	39	88	258	22948	162	54	111	0	208	540	314	4381	111	763	52	7	0	44	0	214	427	0	104	22908	6976	0.324
216.6	15471.2	45102	1.32	8	191	0	0	727	189	1464	35284	798	41	58	342	23097	140	33	89	26	142	601	313	4602	0	668	81	0	0	91	144	160	368	13	32	22911	6977	0.326
216.8	15478.6	45264	1.48	25	226	0	19	820	155	1435	32546	824	36	67	456	24599	165	96	144	60	63	635	283	4406	0	755	21	11	0	118	42	135	446	0	106	23009	6926	0.327
217	15486	45783	1.49	11	181	0	14	786	185	1467	30794	846	54	62	778	26360	169	33	93	19	135	719	283	4308	14	791	29	0	0	6	116	111	351	0	49	23033	6920	0.328
217.2	15493.6	45657	1.36	46	182	0	7	747	177	1467	32404	832	37	43	259	24737	178	74	122	0	72	645	254	4368	0	737	16	30	24	40	131	86	454	0	0	23178	7083	0.326
217.4	15501.2	46648	1.38	35	229	0	20	812	175	1591	34331	889	49	58	274	24873	172	63	112	0	43	728	232	4501	84	786	44	0	0	21	144	172	350	6	131	23418	7055	0.329
217.6	15508.8	45033	1.34	15	150	0	0	792	164	1494	32240	895	27	24	253	24751	87	30	65	0	51	531	360	4374	0	821	21	15	0	38	81	155	411	0	68	22836	7053	0.324
217.8	15516.4	45490	1.77	28	169	0	20	812	200	1400	31739	812	102	93	322	24833	119	31	73	0	107	750	355	4300	44	740	68	0	8	0	172	152	340	0	146	23133	6965	0.329
218	15524	46507	1.46	44	218	0	39	784	198	1546	32103	842	28	44	402	27733	202	65	108	64	50	611	315	4262	0	866	69	14	0	28	112	146	498	0	139	23429	7090	0.329
218.2	15531.4	46828	1.35	29	195	0	23	763	178	1638	32053	840	55	103	434	28821	197	43	73	0	7	508	293	4106	46	806	79	0	26	21	42	94	458	0	115	23553	7261	0.330
218.4	15538.8	46946	1.4	35	201	0	50	794	212	1554	30608	1005	83	53	311	29279	159	36	0	0	56	585	424	4043	0	837	0	32	56	34	88	190	441	0	142	24148	7090	0.328
218.6	15546.2	46646	1.56	41	194	0	38	893	217	1370	25605	855	44	78	308	31683	153	74	59	0	17	685	355	3690	0	718	54	0	15	102	96	216	510	0	0	24181	7341	0.324
218.8	15553.6	47349	1.49	22	163	0	16	886	179	1245	23010	677	57	52	251	36228	106	0	0	0	20	696	367	3373	0	726	48	6	19	30	101	225	491	0	65	24328	7208	0.331
219	15561	47226	1.4	31	147	0	14	829	177	1266	24060	743	11	51	270	33184	127	44	39	0	52	571	362	3405	0	613	47	0	0	0	116	230	492	14	37	24126	6890	0.336
219.2	15568.6	45958	1.55	16	159	0	13	768	161	1371	26982	914	21	49	250	29441	164	58	67	0	60	646	295	3584	66	758	0	20	0	14	134	347	492	0	87	24395	6815	0.324
219.4	15576.2	46197	1.33	53	175	0	34	779	182	1469	28220	844	9	28	327	29308	178	59	71	0	150	555	358	3672	0	631	36	29	8	86	89	126	528	11	157	23680	6837	0.325
219.6	15583.8	45680	1.69	31	156	0	22	826	159	1446	27044	889	7	65	376	27906	129	40	121	0	88	702	299	3660	0	751	0	51	0	12	104	133	516	0	81	23850	7050	0.323
219.8	15591.4	46668	1.81	33	163	0	21	880	200	1363	26246	842	20	82	341	30385	146	44	119	0	89	661	299	3472	69	673	82	7	0	46	106	177	545	0	91	24087	7048	0.330
220	15599	46375	1.39	36	196	0	30	856	177	1438	26744	822	54	67	288	31769	169	0	58	0	46	691	300	3661	0	757	0	48	55	32	125	211	607	0	137	23676	6747	0.324
220.2	15606.4	46315	1.42	16	203	0	22	839	155	1534	29036	788	44	63	259	29135	169	0	96	0	96	635	382	3902	0	708	76	0	37	70	129	160	480	0	63	23932	6928	0.323
220.4	15613.8	46374	1.54	9	197	0	32	751	171	1577	30453	853	7	52	310	28866	186	84	80	0	105	582	417	3945	18	655	65	30	0	19	42	275	542	0	172	24033	7118	0.322
220.6	15621.2	45781	1.34	25	174	0	28	736	189	1507	30655	830	47	46	257	26753	126	53	51	0	44	659	386	3866	0	746	39	5	0	49	118	88	474	0	93	24386	7324	0.323
220.8	15628.6	46553	1.75	7	165	0	21	717	191	1553	31093	917	39	63	333	26970	147	29	55	0	63	681	362	4108	0	675	70	0	0	14	115	222	481	10	0	24140	7100	0.327
221	15636	46436	1.45	28	183	0	0	790	198	1533	31745	828	60	55	306	27104	122	86	115	0	48	664	249	3986	0	761	61	0	0	51	113	190	500	0	34	24341	6983	0.326
221.2	15643.6	45403	1.37	33	216	0	5	706	191	1451	30404	834	22	55	237	26885	120	82	97	0	85	562	335	3957	31	810	61	27	0	32	14	312	376	0	76	23328	7231	0.323
221.4	15651.2	45988	1.57	15	194	0	11	806	171	1564	31250	812	23	83	369	27748	133	78	100	0	115	621	354	4162	37	698	64	0	0	0	103	177	408	0	124	23590	7173	0.322
221.6	15658.8	45722	1.41	31	205	0	6	751	181	1543	31287	841	51	68	357	26446	176	48	136	0	39	599	255	4221	0	623	56	20	0	19	125	0	484	0	11	23440	7149	0.323
221.8	15666.4	45501	1.63	40	187	0	0	764	180	1538	31729	855	20	64	342	26452	121	79	96	56	103	715	330	4188	0	686	59	10	0	81	208	92	451	0	154	23047	6977	0.320
222	15674	45455	1.36	47	184	0	25	778	168	1513	31855	878	44	64	295	26926	211	95	99	0	0	543	336	4032	0	639	18	39	5	47	78	137	460	5	33	23081	7069	0.320
222.2	15681.6	45928	1.43	22	170	0	24	775	195	1552	31028	876	55	77	237	29597	184	72	89	11	63	654	283	3934	0	750	23	38	0	58	131	173	485	0	205	23145	7075	0.320
222.4	15689.2	45311	1.37	47	192	0	4	697	166	1642	32448	926	43	37	318	26074	162	0	70	0	49	687	387	4060	0	697	6	41	0	66	53	141	342	0	105	23532	6947	0.319
222.6	15696.8	45423	1.59	25	216	0	27	749	200	1640	32486	933	52	101	312	26506	139	39	124	0	103	517	389	4167	6	726	17	14	0	25	95	126	451	0	6	23165	6994	0.320
222.8	15704.4	45580	1.38	12	204	0	26	720	202	1639	32274	980	41	72	293	26941	132	34	105	0	24	546	347	4200	0	694	39	51	14	22	134	70	442	0	141	23172	7110	0.320
223	15712	46076	1.44	59	233	0	27	767	208	1598	31789	946	57	92	292	28104	160	48	62	26	186	594	462	4167	0	748	33	8	0	96	142	224	393	0	146	23481	7344	0.319
223.2	15719.6	46340	1.44	22	209	0	0	800	170	1594	32061	918	36	83	293	28045	178	23	73	0	113	701	336	4029	0	787	52	16	21	0	127	200	550	0	134	23797	7170	0.319
223.4	15727.2	46790	1.48	64	207	0	30	836	191	1538	30877	998	48	60	291	29948	178	69	100	0	137	683	394	3885	0	750	0	49	0	18	129	125	593	7	113	23757	7125	0.324
223.6	15734.8	46598	1.55	17	179	0	46	775	185	1626	31167	936	30	40	271	30553	138	114	9	0	100	584	304	3831	0	733	82	28	0	56	51	139	501	0	96	23433	7220	0.323
223.8	15742.4	46314	1.26	36	195	0	15	767	158	1639	31539	831	8	51	290	28291	140	52	100	0	102	627	382	3840	24	725	65	13	0	11	101	135	425	0	58	23581	6925	0.325
224	15750	46393	1.44	29	197	0	20	770	211	1562	32417	845	0	60	357	28524	156	21	102	10	162	615	312	3914	0	774	82	0	0	36	208	0	489	10	135	23686	7075	0.323
224.2	15757.6	45992	1.52	44	177	0	0	718	187	1566	32866	847	39	58	324	27157	165	0	67	0	57	572	334	3978	0	717	50	18	0	11	43	179	375	0	7	23587	7026	0.324
224.4	15765.2	45751	1.64	47	218	0	20	708	154	1499	33075	881	68	66	323	26894	143	37	72	0	126	652	390	4022	0	723	20	57	0	17	101	55	378	0	56	23341	7002	0.320
224.6	15772.8	46720	1.56	26	188	0	7	801	167	1605	33280	877	45	50	282	28500	130	65	44	0	36	606	367	3924	0	758	45	9	0	51	24	89	416	0	88	23644	7065	0.319
224.8	15780.4	46761	1.63	17	199	0	20	756	198	1451	30708	855	21	76	268	29616	134	89	143	42	152	684	370	3777	0	652	20	30	0	103	215	52	427	0	140	24062	7132	0.319
225	15788	46813	1.42	17	152	0	28	815	219	1338	27380	689	15	36	256	31358	130	58	134	0	127	665	337	3584	0	697	53	0	9	0	120	258	503	0	153	24392	6956	0.327
225.2	15795.4	45805	1.36	49	152	0	0	739	178	1398	28402	784	24	52	244	31342	138	58	101	65	134	631	384	3568	0	552	24	17	0	59	110	212	515	6	120	22908	6773	0.319
225.4	15802.8	45812	1.93	0	150	0	19	708	179	1494	29153	874	44	64	226	30665	152	38	116	0	64	710	269	3869	25	581	46	0	23	48	37	192	491	6	138	22795	6836	0.327
225.6	15810.2	46542	1.73	0	207	0	11	720	194	1507	32069	805	52	43	314	29434	168	15	111	0	125	632	330	4041	0	656	69	0	37	35	75	237	456	7	53	23060	6908	0.331
225.8	15817.6	46461	1.42	38	200	0	7	816	167	1520	31647	842	36	35	401	28100	139	90	104	0	83	652	374	4102	0	730	44	18	0	49	59	169	464	26	79	23194	6925	0.329
226	15825	45813	1.5	28	153	0	0	730	188	1491	31579	805	25	69	360	26835	177	69	78	0	108	605	393	3936	0	663	93	0	0	0	26	169	459	16	79	23233	6974	0.328
226.2	15832.6	46088	1.37	23	171	0	4	730	183	1517	32468	778	91	65	306	26927	136	40	131	12	61	571	376	4007	0	801	43	0	0	81	104	212	463	0	63	23225	7065	0.327
226.4	15840.2	45601	1.47	25	215	0	21	725	171	1534	32277	864	0	44	292	26554	161	28	69	0	100	573	364	4119	0	784	58	9	16	78	101	136	420	0	156	22919	7099	0.327
226.6	15847.8	45930	1.6	37	201	0	17	731	214	1546	33236	882	47	68	289	27510	157	45	69	0	60	621	324	4196	19	683	85	13	0	60	82	197	470	0	100	22926	6874	0.327
226.8	15855.4	46244	1.63	34	181	0	20	742	190	1575	35052	873	62	44	273	26316	138	26	65	0	143	570	329	4421	0	657	34	24	0	11	53	148	445	0	126	23164	6935	0.327
227	15863	46137	1.47	30	210	0	0	754	202	1612	35782	865	27	44	266	25685	106	6	101	0	96	630	361	4321	0	624	34	0	0	16	78	185	331	0	13	23078	7056	0.328
227.2	15870.6	46848	1.46	36	181	0	0	813	187	1430	32000	763	47	50	332	30491	186	55	53	0	82	687	392	3892	29	678	37	18	0	0	41	180	524	0	192	23751	6905	0.322
227.4	15878.2	47269	1.65	20	151	0	30	885	194	1371	30080	835	11	38	315	31951	139	0	39	0	59	593	262	3603	0	620	0	29	19	40	50	235	549	6	36	24147	7143	0.327
227.6	15885.8	46999	1.53	15	137	0	10	823	147	1316	28451	716	36	38	297	31960	119	42	56	0	74	630	248	3618	49	796	34	0	0	19	17	319	535	0	62	24324	6953	0.325
227.8	15893.4	45888	1.44	23	169	0	17	794	128	1293	29592	694	39	41	279	29831	166	51	77	15	125	622	328	3861	98	743	55	5	0	47	153	216	465	0	40	23646	6765	0.324
228	15901	46732	1.56	0	140	0	9	779	144	1469	32481	858	36	41	288	29574	172	33	96	0	138	632	337	3883	33	797	0	41	19	31	109	129	493	0	158	23691	6922	0.327
228.2	15908.6	45772	1.49	44	157	0	5	758	161	1437	34327	791	24	61	326	26003	168	85	78	0	57	566	337	4245	0	564	64	0	0	58	99	136	424	0	78	23030	6743	0.326
228.4	15916.2	45412	1.34	30	186	0	28	747	194	1490	34001	860	35	69	287	25498	194	99	81	0	114	612	284	4386	0	650	73	0	15	72	156	195	444	0	144	22863	7030	0.324
228.6	15923.8	45459	1.56	31	194	0	13	761	200	1522	34352	873	28	50	287	25300	153	67	82	0	23	585	311	4379	0	526	41	47	0	31	55	231	465	0	35	23074	6817	0.324
228.8	15931.4	45638	1.35	16	212	0	0	769	225	1475	34189	743	16	71	251	24394	160	89	94	45	81	598	298	4307	0	697	66	0	0	85	126	58	349	0	111	22975	6992	0.329
229	15939	45020	1.35	49	172	0	10	726	207	1448	33606	786	19	88	269	23353	129	66	126	24	0	580	374	4290	0	712	52	0	0	34	103	99	420	8	30	23345	7170	0.327
229.2	15946.6	45425	1.31	27	167	0	37	764	198	1501	33179	833	10	78	265	25000	139	21	63	0	98	600	293	4109	0	760	27	0	14	35	39	241	388	0	0	22837	6834	0.330
229.4	15954.2	44903	1.48	16	168	0	32	760	202	1445	32826	752	33	38	283	24937	184	75	59	0	131	626	209	4146	0	741	22	25	0	74	30	118	474	0	82	22884	6828	0.327
229.6	15961.8	44724	1.53	34	182	0	10	763	208	1507	33480	851	0	71	292	24402	135	0	51	0	103	632	332	4200	32	661	24	0	13	54	149	253	441	0	122	22753	6866	0.325
229.8	15969.4	44924	1.51	25	228	0	42	695	201	1583	33781	836	50	50	282	24587	194	128	79	0	91	562	290	4094	0	656	40	7	0	10	149	0	510	24	44	22438	6884	0.326
230	15977	45127	1.65	20	199	0	25	731	200	1459	33327	876	0	50	307	26592	143	57	49	7	71	590	286	4112	0	607	0	63	0	58	154	140	433	0	242	22687	6748	0.323
230.2	15984.6	46114	1.3	42	179	0	11	775	200	1404	32664	666	31	68	244	27670	142	25	67	0	97	671	266	4059	0	726	54	0	8	17	69	97	480	0	52	23379	6864	0.327
230.4	15992.2	45028	1.48	43	197	0	28	744	199	1413	32518	792	36	51	281	24933	147	78	42	20	53	585	289	4129	39	674	32	0	0	131	50	243	424	0	105	22900	7014	0.325
230.6	15999.8	45145	1.45	27	203	0	18	753	187	1475	34342	756	31	73	293	23902	244	30	99	0	78	605	353	4403	0	660	55	0	22	13	163	123	396	0	178	23293	7019	0.325
230.8	16007.4	45287	1.38	24	191	0	13	751	193	1418	34572	825	44	48	277	21943	200	59	113	0	86	685	321	4523	0	731	30	21	0	59	58	0	361	14	70	23601	7042	0.329
231	16015	45231	1.41	38	190	0	24	733	220	1384	34328	796	30	66	253	21746	169	64	79	0	26	719	366	4432	6	800	41	13	0	63	110	184	419	0	98	23696	7131	0.324
231.2	16022.6	44984	1.39	25	225	0	16	749	181	1389	34814	745	27	44	279	21948	154	31	156	0	92	754	207	4533	0	637	18	0	14	31	119	97	317	0	73	23390	6984	0.323
231.4	16030.2	45568	1.41	54	175	0	23	749	206	1421	34648	868	8	49	330	23234	173	11	73	0	86	629	182	4511	0	704	10	32	0	62	79	105	480	0	0	23228	7238	0.323
231.6	16037.8	44939	1.48	18	179	0	19	760	188	1453	34834	765	60	26	276	22855	159	70	109	30	110	622	320	4435	52	599	17	31	0	115	130	150	423	0	116	23283	6668	0.321
231.8	16045.4	45107	1.68	52	181	0	38	779	236	1483	34845	849	7	74	308	23559	148	66	93	0	122	555	407	4475	0	672	35	41	0	50	61	154	416	0	142	23486	6953	0.323
232	16053	44619	1.46	18	208	0	0	737	202	1454	35485	795	37	59	298	22297	164	82	154	33	58	681	275	4394	117	798	27	6	0	39	0	99	495	0	13	23156	7053	0.322
232.2	16060.6	44907	1.4	41	208	0	0	697	168	1486	36271	823	31	16	372	22556	196	70	63	0	69	598	224	4509	76	668	0	15	0	40	23	170	410	17	83	22978	7229	0.322
232.4	16068.2	44490	1.42	39	190	0	9	751	192	1551	35466	725	47	21	299	22475	126	68	122	0	77	636	325	4530	0	776	90	0	12	69	149	45	395	0	100	22678	7033	0.319
232.6	16075.8	45318	1.36	47	174	0	16	738	192	1441	35807	736	37	16	264	24260	164	61	164	0	48	684	284	4528	0	811	44	0	0	92	80	273	453	0	16	23032	7028	0.323
232.8	16083.4	45036	1.31	38	185	0	0	728	174	1436	37004	846	48	31	319	22221	169	88	91	15	114	645	369	4583	30	612	0	37	0	84	22	191	407	0	84	22945	6987	0.320
233	16091	44715	1.55	42	166	0	18	825	203	1445	36051	825	13	20	345	22509	172	56	125	33	48	619	236	4333	74	810	26	53	0	130	97	64	398	0	109	22890	7087	0.321
233.2	16098.8	45151	1.41	10	162	0	5	741	190	1390	34056	778	12	59	293	25261	169	52	75	0	0	544	307	4196	31	712	15	23	0	7	70	94	352	0	84	22883	6731	0.326
233.4	16106.6	45392	1.47	45	181	0	17	715	199	1407	34528	711	66	32	300	24409	135	64	92	0	9	580	348	4162	0	721	31	28	0	22	62	76	518	0	95	22744	7040	0.328
233.6	16114.4	45639	1.48	29	190	0	21	721	175	1527	35204	804	40	22	352	24964	170	112	71	11	32	554	372	4184	0	721	26	45	0	55	96	70	385	0	118	23078	7187	0.324
233.8	16122.2	45816	1.43	26	191	0	11	742	185	1565	35949	762	72	76	291	24791	199	16	66	0	103	645	272	4070	60	722	47	0	41	40	25	293	458	0	64	23288	7078	0.324
234	16130	46343	1.37	47	204	0	19	745	204	1526	35059	809	22	51	284	26581	158	81	82	0	0	559	283	4204	40	712	42	0	0	58	114	17	432	21	79	23384	6923	0.324
234.2	16137.6	46049	1.46	52	190	0	37	771	193	1435	35132	848	75	75	298	23685	178	54	82	0	15	610	240	4216	0	751	14	13	0	17	54	88	404	0	100	23862	7165	0.327
234.4	16145.2	46366	1.75	0	194	0	40	820	220	1487	35406	853	20	73	294	25701	146	46	112	0	111	663	318	4194	0	661	42	8	31	111	19	271	457	0	88	23571	7101	0.324
234.6	16152.8	46409	1.61	20	197	0	11	821	185	1395	35351	791	16	36	302	23800	192	37	109	0	143	510	389	4330	0	658	40	0	7	105	64	43	478	0	0	23601	7220	0.326
234.8	16160.4	46567	1.45	44	153	0	40	876	213	1331	32989	900	66	10	286	25015	201	76	63	0	69	598	293	4259	0	671	9	16	0	76	146	30	455	0	170	23917	7304	0.326
235	16168	45775	1.35	62	176	0	24	867	198	1355	31954	775	40	71	317	24779	145	98	96	0	62	584	285	4205	0	689	11	18	0	29	69	252	503	0	137	24233	7351	0.323
235.2	16175.8	46016	1.51	45	140	0	13	848	175	1293	30060	754	42	49	305	24844	224	40	55	0	78	587	236	4068	0	686	25	19	0	123	216	17	407	0	34	23970	6798	0.329
235.4	16183.6	46343	1.47	45	155	0	12	795	166	1366	29834	721	28	71	282	26491	157	85	72	0	72	572	296	3906	0	669	44	0	0	7	118	207	481	34	122	24225	7039	0.330
235.6	16191.4	45349	1.32	35	135	0	0	855	205	1199	28571	688	34	35	344	24735	168	51	55	0	83	584	266	3950	0	666	69	0	0	10	96	0	521	0	25	24916	7102	0.322
235.8	16199.2	45465	1.33	45	184	0	29	854	181	1280	31088	735	51	49	341	25731	172	0	151	0	40	558	231	3865	0	583	21	12	12	64	221	9	477	0	62	23619	7063	0.320
236	16207	44324	1.56	28	173	0	24	836	203	1339	30344	653	41	57	284	22429	136	74	77	0	79	558	294	3804	0	670	42	0	0	101	120	20	452	0	56	23254	6904	0.326
236.2	16214.6	44826	1.35	39	129	0	23	838	168	1344	29115	806	42	47	316	24041	198	41	110	0	82	628	351	3846	0	716	0	33	0	7	77	135	459	0	116	24347	6955	0.325
236.4	16222.2	44977	1.25	13	158	0	0	805	210	1276	31202	754	24	46	307	24727	160	96	76	26	100	586	288	3898	0	702	25	15	0	94	62	92	454	0	74	23411	6955	0.324
236.6	16229.8	45365	1.37	56	168	0	19	809	178	1428	31861	754	41	46	323	25519	174	67	82	0	162	574	237	3837	16	699	108	0	0	19	102	176	433	0	156	23255	6898	0.324
236.8	16237.4	45493	1.4	49	203	0	0	795	158	1437	33193	808	61	53	323	25157	168	29	81	6	111	605	274	4051	0	681	17	0	0	8	132	87	462	0	108	23787	7241	0.323
237	16245	45921	1.42	0	166	0	13	787	160	1454	33403	778	61	47	290	25827	183	102	107	0	94	570	321	4020	20	779	30	16	0	61	55	96	470	0	24	22837	6809	0.327
237.2	16252.8	45143	1.44	28	200	0	18	741	177	1375	33871	789	18	68	354	23913	202	76	140	0	81	588	360	4073	0	649	45	10	18	0	72	305	454	6	147	22971	7006	0.327
237.4	16260.6	45137	1.41	41	184	0	10	777	195	1476	33502	823	35	51	262	24577	177	69	143	0	66	578	300	4264	0	620	61	0	0	35	186	0	403	0	61	22808	6906	0.329
237.6	16268.4	45023	1.41	29	172	0	10	825	208	1409	34002	832	26	53	309	22836	222	86	123	39	114	570	315	4156	0	712	0	52	0	94	87	36	457	0	62	22964	6991	0.326
237.8	16276.2	45453	1.54	23	157	0	24	788	195	1363	33432	854	64	39	289	24837	148	33	88	0	186	617	218	3992	0	677	0	45	0	0	118	104	411	0	180	23250	7251	0.326
238	16284	45422	1.49	28	168	0	16	730	196	1311	31359	740	22	42	271	24107	149	39	112	0	77	703	201	3964	0	738	48	0	0	22	105	131	407	0	63	23759	6966	0.325
238.2	16291.6	45345	1.55	23	182	0	8	776	227	1384	32171	853	18	92	310	25048	172	0	145	0	70	614	257	3872	0	593	55	0	31	49	35	228	415	0	29	23294	6986	0.325
238.4	16299.2	44958	1.36	59	213	0	35	707	225	1484	33937	784	70	102	323	23893	188	71	127	0	139	655	245	4058	0	644	62	0	0	26	116	147	465	17	86	22943	6851	0.323
238.6	16306.8	45150	1.49	16	158	0	9	760	183	1392	33108	726	42	62	302	24391	146	25	78	35	11	578	287	3874	0	609	94	0	0	33	30	175	460	0	102	23358	7088	0.325
238.8	16314.4	44788	1.41	38	203	0	15	653	198	1411	32480	861	41	24	288	24680	148	6	86	0	79	700	321	3779	0	588	6	4	0	25	132	152	353	0	133	22700	6804	0.325
239	16322	44647	1.32	42	172	0	0	716	207	1312	32033	780	71	37	301	24996	185	55	89	14	61	585	224	3798	0	775	37	7	0	74	44	92	432	0	163	23011	6789	0.326
239.2	16329.8	43957	1.46	16	176	0	10	759	190	1368	32264	808	54	43	311	22855	140	94	81	0	72	574	309	4019	4	604	29	22	0	45	64	87	445	8	74	23059	6629	0.324
239.4	16337.6	44036	1.36	38	173	0	7	785	197	1357	32862	792	0	70	314	22393	158	51	143	0	145	621	293	4052	5	809	5	34	0	59	112	102	473	0	50	23001	7127	0.327
239.6	16345.4	43985	1.54	25	194	0	7	829	184	1411	32991	809	8	86	359	22076	137	10	114	0	136	632	256	4101	0	690	0	19	0	78	128	95	327	0	0	23045	6800	0.323
239.8	16353.2	44627	1.42	56	189	0	20	769	245	1359	33821	761	5	28	298	23347	133	34	36	0	70	503	308	4158	0	568	57	0	0	70	82	293	418	0	42	22429	6708	0.327
240	16361	44016	1.51	28	191	0	0	797	217	1353	33743	716	33	58	264	22820	176	15	90	0	78	525	269	3923	8	675	57	0	0	11	56	235	315	13	0	22817	6752	0.325
240.2	16368.8	44165	1.45	20	161	0	0	706	222	1415	34254	828	13	75	299	23219	150	29	115	0	88	551	389	4202	22	581	5	25	0	48	86	54	450	0	121	22054	6957	0.325
240.4	16376.6	43817	1.39	24	184	0	28	775	195	1432	34624	842	16	77	276	21883	96	35	61	0	45	470	185	4168	0	703	24	20	0	41	98	0	327	0	36	22375	7022	0.327
240.6	16384.4	43458	1.38	0	159	0	0	651	203	1391	34674	819	71	61	278	22134	189	92	95	0	32	559	268	4074	0	758	16	15	0	53	101	22	427	0	0	22248	6826	0.318
240.8	16392.2	44546	1.43	44	187	0	36	723	192	1463	35724	828	19	81	297	24614	132	78	104	29	85	655	344	4058	34	728	37	11	0	97	169	51	407	0	5	22546	6922	0.321
241	16400	43942	1.32	61	184	0	28	670	208	1342	35010	815	30	57	324	22948	150	46	106	0	90	604	326	3976	25	731	30	8	28	45	152	87	473	12	136	22201	6843	0.322
241.2	16407.8	43798	1.45	20	172	0	7	649	176	1441	34329	822	39	52	305	22982	200	42	54	0	80	562	266	3971	0	554	38	0	0	64	73	77	445	0	64	22539	6825	0.319
241.4	16415.6	43826	1.43	25	175	0	0	694	220	1380	34382	787	51	43	367	22630	148	47	146	9	38	535	303	4015	0	668	18	18	0	90	61	117	470	0	0	22529	6922	0.320
241.6	16423.4	44183	1.35	14	178	0	12	739	233	1409	34699	831	0	31	296	24066	155	57	109	0	111	574	251	4005	0	660	0	5	4	43	59	179	323	17	99	22666	6663	0.318
241.8	16431.2	44147	1.39	43	182	0	33	726	211	1396	33081	861	26	77	298	23894	123	57	102	0	133	573	257	3974	0	597	0	9	5	42	102	137	442	0	198	22795	6654	0.322
242	16439	44475	1.78	44	176	0	0	734	231	1427	31782	690	68	51	273	25632	137	140	43	39	28	567	314	3605	0	629	91	0	0	82	82	185	364	0	88	22615	6444	0.326
242.2	16446.8	45122	1.49	13	173	0	22	776	194	1332	30708	717	26	50	296	26890	163	70	43	0	105	570	302	3840	38	685	44	0	0	67	90	239	469	0	21	23293	6927	0.326
242.4	16454.6	44857	1.47	8	150	0	17	766	221	1407	31049	813	29	21	272	27456	166	22	25	22	69	569	293	3647	0	640	9	42	0	92	109	119	392	0	0	23082	6648	0.322
242.6	16462.4	44398	1.28	13	181	0	37	802	189	1319	32131	736	11	61	301	25697	151	89	141	26	101	582	399	3931	0	647	44	0	0	98	115	87	419	0	70	22904	6944	0.320
242.8	16470.2	43827	1.34	39	150	0	18	815	197	1350	31387	789	51	56	310	23991	120	158	135	0	118	566	367	3921	93	740	9	38	0	38	112	184	385	0	69	23027	6843	0.324
243	16478	43474	1.44	39	154	0	38	792	246	1260	32600	693	26	70	322	23442	163	62	100	0	55	569	333	3796	0	704	48	15	0	87	45	86	443	20	17	21950	6571	0.324
243.2	16486	43179	1.5	51	192	0	16	790	209	1343	33108	740	24	30	335	23710	143	97	66	25	90	558	291	3881	53	597	46	30	0	22	66	170	408	21	88	22850	6825	0.312
243.4	16494	44674	1.36	57	191	0	13	796	212	1309	32038	814	52	0	305	24418	160	58	93	26	86	612	201	3852	0	730	19	40	0	0	148	204	418	7	183	23349	7039	0.325
243.6	16502	44850	1.37	35	137	0	25	834	220	1182	29060	656	27	58	253	25976	162	65	103	0	86	707	241	3650	0	598	89	12	35	62	13	125	478	0	54	23048	6875	0.332
243.8	16510	44524	1.5	45	149	0	24	816	213	1264	31073	843	5	61	272	25499	159	87	121	28	100	656	306	3599	0	603	26	42	0	22	76	169	425	0	127	23102	6763	0.324
244	16518	43798	1.46	23	182	0	23	764	212	1320	29363	727	48	81	286	25761	132	17	84	0	104	501	195	3613	0	692	34	0	45	15	80	127	360	0	20	22743	6641	0.324
244.2	16526	43071	1.52	0	139	0	13	746	224	1328	30178	719	47	35	262	23715	148	39	106	0	126	595	294	3843	0	650	54	13	0	46	50	198	401	0	115	22112	6623	0.323
244.4	16534	42945	1.47	0	173	0	0	787	212	1332	32002	731	55	55	296	23155	152	125	74	0	160	582	255	3800	0	742	54	10	0	66	29	8	385	0	0	22323	6665	0.318
244.6	16542	43188	1.38	17	141	0	7	697	220	1278	31758	738	48	43	301	24254	160	0	89	0	66	535	216	3774	0	671	5	4	18	30	131	0	406	0	63	22007	6808	0.325
244.8	16550	42786	1.63	0	170	0	17	725	247	1356	31718	825	0	44	291	22999	135	44	35	0	122	574	363	3876	40	687	12	45	0	27	106	232	375	0	111	22315	6840	0.323
245	16558	42548	1.47	23	183	0	16	670	245	1334	32174	768	22	97	258	22101	182	35	84	13	115	623	278	3725	0	648	41	11	0	40	154	120	396	0	59	21654	6851	0.324
245.2	16565.8	42400	1.38	53	154	0	8	714	210	1331	31019	776	31	37	295	22745	133	0	134	0	0	529	240	3764	0	618	38	11	32	65	119	0	439	6	90	22251	6451	0.321
245.4	16573.6	42121	1.37	20	179	0	0	691	225	1295	31528	713	41	64	258	21604	138	20	32	0	68	579	251	3684	21	731	57	0	0	68	30	104	350	21	99	22173	6528	0.321
245.6	16581.4	41907	1.78	11	144	0	0	764	222	1349	31686	762	30	32	213	21282	119	31	147	0	97	604	180	3784	0	637	46	22	0	65	119	126	376	0	79	21617	6513	0.322
245.8	16589.2	42138	1.37	36	153	0	13	672	179	1293	32202	791	37	31	288	21288	161	38	80	0	66	567	309	3873	0	703	0	25	14	54	92	219	362	0	0	21918	6321	0.324
246	16597	42058	1.53	25	186	0	20	672	254	1262	30554	715	49	9	256	22659	185	0	88	0	63	508	264	3743	0	551	29	17	52	53	55	246	332	15	67	22138	6619	0.321
246.2	16605.2
246.4	16613.4
246.6	16621.6
246.8	16629.8
247	16638
247.2	16646.2
247.4	16654.4
247.6	16662.6
247.8	16670.8
248	16679
248.2	16687.2
248.4	16695.4
248.6	16703.6
248.8	16711.8
249	16720
249.2	16728.4
249.4	16736.8
249.6	16745.2
249.8	16753.6
250	16762
250.2	16770.4
250.4	16778.8
250.6	16787.2
250.8	16795.6
251	16804
251.2	16812.2
251.4	16820.4
251.6	16828.6
251.8	16836.8	42018	1.36	51	166	0	14	704	204	1261	29370	761	33	40	230	21640	115	66	119	49	94	521	268	3449	0	603	27	0	0	19	63	132	371	0	137	21587	6640	0.335
252	16845	42574	1.51	12	158	0	12	646	212	1301	30609	768	9	33	302	21916	153	55	116	36	81	459	250	3423	0	700	38	24	0	52	164	42	338	17	22	21535	6747	0.335
252.2	16853.6	42648	1.39	7	214	0	0	769	189	1400	30953	749	21	73	326	21760	164	28	138	0	131	586	360	3662	0	691	38	20	0	32	125	146	418	0	51	21666	6686	0.330
252.4	16862.2	43011	1.35	8	173	0	32	708	199	1288	32898	683	35	46	222	19896	190	72	80	0	62	584	221	3879	0	554	41	29	0	33	169	42	418	9	75	21710	6873	0.334
252.6	16870.8	43467	1.29	0	156	0	0	675	181	1381	33365	770	20	89	263	21754	128	87	42	0	117	612	281	3910	16	784	30	12	0	18	26	164	384	0	71	21887	6761	0.330
252.8	16879.4	42953	1.43	19	177	0	0	706	195	1337	32814	851	0	86	224	21216	144	56	162	0	141	613	301	4117	0	713	41	0	0	97	147	164	340	0	0	21980	6609	0.326
253	16888	43056	1.52	34	164	0	0	689	197	1344	34344	772	34	43	297	21579	196	70	75	0	36	509	344	4185	0	682	18	25	0	0	43	9	371	0	42	22015	6534	0.321
253.2	16896.6	44407	1.54	0	192	0	8	764	184	1450	35348	785	39	94	318	22429	137	60	82	0	90	568	293	4235	5	713	73	0	0	69	86	74	434	0	148	22339	7053	0.326
253.4	16905.2	44541	1.35	23	138	0	36	731	192	1369	35777	718	56	72	296	23543	192	15	112	0	95	508	204	4256	22	631	61	0	21	83	90	0	493	7	158	22195	6619	0.324
253.6	16913.8	45613	1.41	35	169	0	33	817	179	1263	32091	829	35	51	270	26092	153	77	74	0	101	557	371	4194	0	618	0	44	51	0	158	75	525	8	108	23450	6902	0.325
253.8	16922.4	45102	1.63	25	133	0	0	906	208	1236	26667	740	36	47	281	28231	154	22	79	0	114	602	297	3448	0	576	31	27	0	51	170	199	440	26	72	23554	6901	0.324
254	16931	44606	1.44	7	124	0	17	862	180	1222	27430	733	14	67	291	26243	146	35	96	0	49	612	278	3338	0	647	9	14	0	25	149	157	339	7	32	23188	6678	0.331
254.2	16939.8	44263	1.38	39	157	0	35	744	177	1307	30790	782	44	41	291	24736	147	48	144	13	16	574	281	3720	16	596	48	4	0	22	129	253	440	0	24	22648	6632	0.327
254.4	16948.6	45141	1.39	0	113	0	0	783	205	1248	28951	727	34	0	264	27924	116	81	82	0	49	553	251	3490	8	685	0	30	0	131	124	240	457	0	68	22866	6784	0.328
254.6	16957.4	44258	1.47	0	156	0	28	747	201	1277	30256	697	45	51	257	25906	154	74	129	0	185	601	255	3560	84	742	48	16	0	46	116	126	455	0	51	22910	6807	0.321
254.8	16966.2	44460	1.46	37	195	7	14	772	224	1321	31136	731	37	61	317	25158	173	0	73	0	62	551	308	3762	0	680	81	7	38	36	104	62	374	0	161	22601	6746	0.329
255	16975	44731	1.47	33	174	0	24	742	219	1403	30117	731	55	51	302	26925	165	79	30	0	127	588	319	3667	0	754	0	16	0	81	78	150	399	21	53	22614	6763	0.328
255.2	16983.6	45018	1.56	17	163	0	19	789	210	1394	30257	825	23	105	255	28941	139	43	113	0	0	558	275	3447	6	703	38	0	0	49	141	216	476	0	31	22815	6935	0.326
255.4	16992.2	44821	1.49	19	164	0	18	786	184	1447	32150	767	44	79	241	25845	123	63	159	0	123	566	310	3743	0	655	48	25	38	69	83	173	437	25	147	22766	6974	0.328
255.6	17000.8	44978	1.46	44	164	0	35	823	206	1417	32869	703	65	23	297	25916	174	25	75	16	86	593	288	3751	0	748	48	14	12	41	95	180	436	0	142	22544	6712	0.326
255.8	17009.4	44527	1.4	43	210	0	0	764	189	1443	32616	772	49	90	366	25559	131	24	124	0	57	645	276	3807	0	684	48	6	0	0	80	147	391	0	84	22909	6727	0.322
256	17018	44864	1.54	25	160	0	0	735	185	1383	32792	761	9	45	305	25839	171	66	90	23	123	593	305	3787	8	693	45	17	9	89	142	168	507	0	146	22638	6744	0.329
256.2	17026.8	44301	1.3	49	185	0	0	680	188	1390	34117	747	31	45	420	24215	188	53	129	0	58	550	333	3896	53	673	21	7	0	23	145	18	462	17	83	22234	6714	0.327
256.4	17035.6	44048	1.45	43	207	0	0	726	237	1401	34013	780	13	42	354	22570	159	57	82	0	88	536	299	4216	39	768	61	0	12	0	18	142	434	5	0	22635	6789	0.325
256.6	17044.4	44731	1.45	25	180	0	24	707	170	1484	34354	802	32	32	259	24265	177	84	155	18	75	651	228	4130	0	620	37	0	0	98	175	205	429	30	68	22481	6940	0.326
256.8	17053.2	44858	1.42	45	212	0	25	725	156	1515	34140	825	0	63	260	25567	186	19	75	0	101	551	362	3731	36	719	58	6	0	48	0	211	458	0	85	22666	6958	0.324
257	17062	44707	1.45	30	206	0	0	687	247	1443	34334	797	31	70	305	24767	151	85	102	0	138	595	325	3844	0	772	92	0	0	41	77	196	443	0	116	22193	6727	0.326
257.2	17070.8	45310	1.46	27	193	0	0	706	179	1490	34220	832	25	49	312	24947	144	54	116	0	92	554	280	3899	0	679	24	8	0	0	116	121	397	25	132	22366	6667	0.333
257.4	17079.6	45155	1.37	20	194	0	29	720	149	1563	35032	896	63	55	315	24673	149	44	146	24	78	650	377	3876	10	782	34	24	0	93	163	107	394	6	116	22250	6812	0.329
257.6	17088.4	45011	1.51	26	188	0	0	774	236	1560	34465	886	57	43	345	25011	221	24	126	32	116	658	308	3834	43	770	13	23	6	53	126	90	534	0	229	22657	6783	0.328
257.8	17097.2	45222	1.59	11	179	0	24	741	211	1618	34409	847	50	81	295	25111	169	69	142	45	151	558	291	3807	0	757	58	21	0	109	160	158	434	0	78	22773	7011	0.328
258	17106	45606	1.56	13	193	0	15	767	227	1377	32403	787	53	29	265	28187	153	83	109	0	0	532	274	3594	0	768	49	0	0	35	80	93	465	0	110	22390	6938	0.329
258.2	17115	45766	1.46	15	178	0	25	769	193	1235	30620	761	10	30	233	30422	121	0	35	0	23	506	371	3601	0	650	7	15	0	56	152	171	472	0	37	22668	6903	0.331
258.4	17124	45213	1.28	39	191	0	28	810	172	1450	31578	814	49	33	256	27837	155	13	69	0	141	603	256	3546	0	734	6	38	0	51	57	177	455	22	92	22897	6870	0.329
258.6	17133	44992	1.46	19	171	0	0	784	219	1488	33793	846	26	63	277	25630	121	80	94	33	105	550	332	3700	0	632	28	33	0	122	77	122	485	0	108	22409	6880	0.326
258.8	17142	44817	1.55	0	175	0	0	761	211	1473	33572	798	61	50	305	25399	200	41	85	0	39	607	399	3897	0	629	36	31	0	100	114	231	450	0	84	22583	6847	0.327
259	17151	44226	1.39	33	180	0	17	742	201	1405	32965	757	41	83	308	23842	168	76	112	0	72	502	276	3879	21	637	45	0	0	66	166	132	478	0	0	22486	6790	0.328
259.2	17160	44026	1.37	62	165	0	0	689	195	1395	33129	730	37	60	326	23512	172	72	125	0	81	594	341	3979	0	585	65	24	0	53	69	159	464	0	111	22273	6735	0.327
259.4	17169	44249	1.44	26	210	0	0	717	208	1378	34037	856	59	59	344	23587	151	122	223	0	87	595	321	4029	0	663	14	10	0	41	94	148	414	0	91	22196	6816	0.327
259.6	17178	43963	1.39	25	206	0	15	733	199	1471	34724	815	21	64	281	22790	166	80	52	0	65	623	262	4057	77	763	53	0	0	37	24	170	417	0	0	21891	6713	0.328
259.8	17187	44126	1.54	19	198	0	16	765	199	1451	35232	774	40	75	445	22699	207	61	118	18	136	509	305	4074	0	587	69	6	0	34	115	76	488	0	79	22296	6755	0.325
260	17196	44235	1.69	22	253	0	24	728	208	1640	35849	921	45	68	306	23296	147	86	101	0	6	594	306	4044	0	795	73	16	0	24	90	70	366	0	0	22120	6728	0.323
260.2	17205.2	44108	1.32	62	230	0	0	694	181	1478	35793	818	50	51	332	22981	138	84	64	0	29	507	336	3916	65	668	36	0	0	22	33	0	465	0	113	22174	6827	0.324
260.4	17214.4	44732	1.39	20	196	0	0	697	196	1561	36067	845	16	56	331	24703	192	36	92	0	91	509	256	3883	20	706	62	0	26	34	35	222	422	0	133	22336	6812	0.324
260.6	17223.6	45205	1.35	40	189	0	0	750	215	1563	36269	794	47	83	370	25549	176	17	90	48	106	501	237	3854	0	723	80	0	24	44	44	80	478	0	72	22195	6934	0.327
260.8	17232.8	45309	1.44	19	244	0	0	746	199	1597	35697	826	31	76	326	26454	186	0	178	0	109	550	269	3860	0	680	47	15	9	18	115	302	417	0	71	22530	6899	0.325
261	17242	44794	1.5	31	171	0	22	724	164	1378	32380	738	24	51	327	25494	185	39	86	17	0	556	272	3677	0	667	32	17	0	26	26	196	432	0	0	22617	6722	0.329
261.2	17251	44777	1.45	46	163	0	13	730	221	1434	32776	777	22	101	332	25912	147	40	103	0	107	496	284	3594	0	691	57	0	0	19	20	59	433	0	47	22319	6658	0.331
261.4	17260	45474	1.4	25	195	0	16	766	222	1370	31738	792	51	40	308	28809	133	52	4	0	92	569	307	3528	0	690	15	12	0	17	96	75	448	0	88	22548	6591	0.328
261.6	17269	45487	1.63	41	154	0	50	780	147	1283	30515	792	79	40	327	28945	125	8	19	0	104	507	284	3557	0	702	7	0	0	0	64	98	437	0	0	22698	6772	0.329
261.8	17278	45272	1.47	48	213	0	32	797	200	1281	31980	754	24	62	323	28170	137	14	52	0	90	503	266	3622	25	605	91	0	0	0	78	129	476	0	97	22458	6822	0.332
262	17287	44858	1.45	20	208	0	25	717	223	1541	33943	838	36	65	313	26182	178	47	119	0	0	520	321	3795	0	687	80	0	0	117	115	230	445	0	12	21882	6819	0.328
262.2	17296.2	44596	1.46	15	199	0	0	641	207	1387	33729	773	0	51	376	25351	225	21	108	0	38	582	427	3963	75	791	40	15	0	12	124	104	370	0	54	22754	6866	0.325
262.4	17305.4	44972	1.37	37	189	0	18	761	203	1487	34787	845	31	64	357	24837	145	108	78	14	24	541	244	3838	94	660	56	5	0	89	127	103	488	0	127	22624	6774	0.328
262.6	17314.6	44841	1.37	59	212	0	0	730	229	1526	34153	912	0	28	312	24311	198	28	66	0	83	529	386	4129	45	626	0	40	13	19	91	61	397	0	55	22753	6761	0.326
262.8	17323.8	44369	1.45	39	212	0	13	765	190	1558	34022	863	85	37	316	23374	171	47	138	9	98	640	243	3922	0	683	35	10	0	74	73	139	397	5	183	22527	6920	0.326
263	17333	44305	1.49	24	171	0	31	772	186	1461	33935	833	43	72	299	23500	139	94	149	0	109	492	361	4064	0	717	54	0	0	36	143	140	428	0	31	22689	7044	0.325
263.2	17342.2	44803	1.35	38	162	0	0	771	170	1516	34244	896	24	13	375	24192	182	59	122	0	108	608	264	4032	0	650	35	29	0	0	63	111	455	0	90	22556	6824	0.328
263.4	17351.4	45071	1.48	27	186	0	0	790	206	1542	34143	846	67	59	364	25405	156	45	71	0	66	525	259	4044	0	680	73	0	0	73	48	190	424	4	54	22040	7009	0.326
263.6	17360.6	45858	1.41	25	169	0	15	782	207	1462	33500	806	39	64	350	28625	155	39	61	0	118	573	210	3626	0	706	25	35	31	6	18	165	467	0	56	22899	6908	0.320
263.8	17369.8	45609	1.44	32	139	0	0	821	201	1408	32167	715	40	47	306	29542	155	104	37	28	144	592	256	3573	10	663	35	15	0	54	0	148	391	0	185	22575	6836	0.321
264	17379	44988	1.44	26	122	0	37	859	175	1298	31385	719	31	32	273	29549	150	28	25	19	76	587	289	3628	0	616	40	0	0	54	122	215	500	15	162	22702	6901	0.319
264.2	17388.2	45321	1.41	41	170	0	0	744	189	1320	33046	706	28	66	348	28397	142	79	81	0	62	589	310	4053	0	650	54	9	0	42	88	105	530	0	24	22501	6663	0.321
264.4	17397.4	45143	1.43	28	144	0	26	747	165	1426	35601	726	0	53	263	27386	166	109	128	0	105	622	207	4188	56	671	63	0	0	25	127	17	394	0	118	22697	7092	0.318
264.6	17406.6	44798	1.4	0	184	0	0	709	176	1499	37444	791	10	32	280	22281	107	93	126	0	79	669	313	4456	0	665	11	16	44	80	86	138	414	9	75	22813	6978	0.322
264.8	17415.8	44951	1.52	17	200	0	0	784	168	1429	39346	872	39	30	314	21001	186	43	31	0	107	718	283	4468	0	650	13	26	5	78	57	158	371	0	139	22796	6810	0.322
265	17425	44959	1.51	22	181	0	28	702	201	1564	39490	858	0	42	326	21656	161	81	133	0	76	640	227	4559	0	545	32	36	15	31	59	143	401	10	144	22667	6824	0.324
265.2	17434.2	44568	1.35	25	211	0	0	733	197	1502	38710	859	7	0	288	21295	140	6	53	0	142	542	315	4242	0	700	0	9	62	22	99	54	416	0	0	22271	6744	0.331
265.4	17443.4	45831	1.34	40	201	0	0	737	204	1470	37574	857	30	5	340	23407	176	33	107	0	56	645	306	4318	0	577	41	0	0	44	110	46	389	0	195	22755	6947	0.334
265.6	17452.6	45966	1.6	32	183	0	12	760	246	1492	36170	773	45	65	336	24771	157	0	62	0	107	643	338	4043	15	759	86	0	11	91	74	100	348	32	48	23429	7050	0.329
265.8	17461.8	46066	1.46	22	158	0	0	754	242	1427	36642	804	50	0	322	23784	159	25	78	0	31	566	260	3957	67	723	45	40	0	39	129	269	407	0	104	22579	6926	0.336
266	17471	44771	1.49	24	169	0	0	746	164	1367	34131	746	47	17	317	23743	189	42	157	0	125	571	256	3817	0	740	0	27	27	15	89	104	499	0	5	22858	6738	0.328
266.2	17480	44906	1.34	14	200	0	16	772	216	1413	34348	750	0	98	301	23828	152	66	74	0	74	588	384	3961	0	723	56	20	0	98	95	108	460	0	106	22693	6918	0.331
266.4	17489	44866	1.48	0	165	0	6	771	195	1455	35927	741	87	21	265	22189	153	55	104	0	46	656	261	4198	96	710	52	7	0	0	105	159	469	0	147	23079	6878	0.330
266.6	17498	44436	1.34	42	215	0	15	726	204	1409	36160	693	63	30	284	22938	191	51	150	0	79	650	273	4327	0	506	55	38	42	23	103	167	419	13	69	22361	6854	0.324
266.8	17507	45360	1.31	36	172	0	14	750	182	1440	37232	782	15	34	325	23192	167	35	120	0	80	536	301	4305	0	676	16	34	0	33	96	0	423	0	50	22766	7065	0.332
267	17516	45625	1.35	0	180	0	5	778	188	1492	36702	712	41	0	326	24034	186	37	143	0	73	614	332	4090	7	780	66	6	0	59	168	118	445	0	0	22575	6942	0.330
267.2	17525.4	45611	1.42	34	177	0	28	774	210	1446	35218	758	78	18	348	25093	127	10	84	0	153	619	356	3907	0	726	23	12	42	43	119	100	486	13	29	22441	6864	0.330
267.4	17534.8	46165	1.6	46	197	0	5	770	190	1377	36095	746	24	57	311	24950	160	81	151	0	68	607	232	4074	0	580	23	14	0	87	79	167	415	0	108	22856	7112	0.333
267.6	17544.2	46303	1.36	43	189	0	0	896	186	1324	33259	778	40	36	341	26214	138	20	0	0	16	649	337	3936	0	648	0	15	7	39	110	112	415	0	81	23408	7081	0.331
267.8	17553.6	45629	1.39	34	202	0	50	865	197	1252	30619	705	57	46	333	27433	178	91	79	15	54	570	265	3772	0	654	0	34	0	54	29	244	471	0	57	23081	7147	0.327
268	17563	45421	1.47	33	158	0	49	829	200	1277	31129	668	31	96	247	27235	167	67	99	0	125	560	295	3726	37	669	42	0	0	27	0	142	508	0	138	22760	7013	0.332
268.2	17572.2	45182	1.46	43	117	0	30	829	178	1229	31905	635	67	35	257	30163	203	83	152	10	89	561	218	3776	0	643	17	44	26	48	123	195	555	0	101	21894	6544	0.331
268.4	17581.4	43900	1.5	43	150	0	14	814	183	1398	32099	755	47	36	319	22348	182	75	94	0	60	561	348	4134	0	580	48	22	0	74	117	116	381	0	49	22642	6990	0.332
268.6	17590.6	43847	1.52	25	178	0	8	879	209	1390	31351	779	14	58	307	22609	160	62	37	0	53	584	322	4252	0	636	55	13	35	49	88	214	393	0	14	22311	6979	0.328
268.8	17599.8	44113	1.5	48	181	0	19	802	188	1501	33864	923	16	71	302	22941	171	41	124	0	63	610	233	4156	0	639	26	30	29	38	83	122	438	23	21	22565	7188	0.327
269	17609	44520	1.4	22	179	0	45	761	208	1426	35425	842	38	50	336	24044	177	27	144	0	114	514	318	4106	0	783	37	13	26	55	128	196	402	0	76	22174	6883	0.326
269.2	17618.4	44911	1.45	40	193	0	45	725	181	1530	36850	786	25	46	313	25409	158	18	104	0	77	590	301	4034	0	554	61	0	64	72	106	208	431	0	49	21636	6791	0.329
269.4	17627.8	44988	1.5	17	188	0	17	790	214	1397	36940	740	5	38	278	23092	211	40	65	6	41	508	344	4293	0	706	82	0	0	0	166	106	422	0	103	22220	7145	0.330
269.6	17637.2	45351	1.5	36	190	0	16	760	206	1363	38508	698	40	66	294	22596	168	40	61	0	61	563	337	4348	0	672	32	0	0	54	161	157	438	13	10	22991	6839	0.330
269.8	17646.6	45730	1.35	36	142	0	0	885	180	1255	34494	636	70	43	262	25477	173	29	87	0	84	618	322	3975	29	741	58	0	0	75	66	129	423	0	118	22816	6692	0.333
270	17656	44216	1.34	59	171	0	12	864	174	1279	34949	688	13	39	293	23920	170	65	108	0	109	605	259	4025	113	690	38	13	0	102	71	127	467	0	93	21821	6670	0.325
270.2	17665.2	43408	1.43	40	175	0	0	808	206	1339	37021	811	16	46	325	21261	72	37	99	0	31	494	239	4251	18	785	0	20	0	30	45	145	375	0	52	21677	6997	0.325
270.4	17674.4	43735	1.4	34	160	0	8	722	233	1391	37855	731	6	78	366	20923	207	72	88	18	49	557	221	4366	67	733	56	9	0	133	65	62	345	5	0	22042	6945	0.323
270.6	17683.6	44265	1.79	27	140	0	4	850	225	1375	38343	684	5	48	338	20422	156	84	90	0	37	588	288	4457	0	720	79	18	0	0	33	38	314	0	60	21456	6646	0.330
270.8	17692.8	45133	1.41	30	223	0	35	775	187	1401	40327	745	0	64	306	22384	180	52	111	0	113	600	355	4561	98	660	92	0	12	86	114	122	446	0	89	22112	7036	0.329
271	17702	46660	1.39	44	282	0	0	926	190	1519	42284	764	25	17	293	21607	216	72	121	0	113	626	230	4870	0	768	48	13	30	27	147	99	418	0	90	23082	7078	0.331
271.2	17711.4	47516	1.56	57	236	0	0	939	174	1547	42088	775	39	25	377	22561	190	18	97	0	123	638	316	4845	0	661	76	18	0	33	29	244	423	0	39	23533	7345	0.330
271.4	17720.8	48194	1.73	25	163	0	32	1067	214	1431	39395	716	28	27	308	22668	139	54	92	0	75	693	269	4707	0	731	75	11	0	30	0	191	423	16	30	24035	7607	0.336
271.6	17730.2	48251	1.35	34	205	0	26	912	159	1327	40871	723	13	53	322	21802	162	78	83	0	64	662	282	5067	0	662	87	0	0	46	114	98	391	6	0	24010	7494	0.335
271.8	17739.6	47944	1.32	9	173	0	8	904	184	1405	41734	716	35	80	287	21466	161	17	82	0	44	689	302	4907	5	752	48	0	27	0	77	112	389	17	71	23942	7273	0.329
272	17749	47398	1.5	18	177	0	0	876	243	1378	40310	648	22	90	342	21359	154	30	97	0	49	662	334	4885	107	794	81	0	0	0	110	216	356	0	157	24199	7287	0.332
272.2	17758.2	46139	1.49	26	140	0	5	889	148	1391	39617	794	11	71	380	21233	186	113	181	0	137	596	238	4654	0	656	33	9	0	110	23	156	355	0	168	22830	7215	0.334
272.4	17767.4	46902	1.26	22	147	0	10	854	184	1398	40837	785	0	23	295	21299	176	50	43	0	106	686	234	4813	0	748	13	48	0	43	58	161	367	0	27	23439	7265	0.334
272.6	17776.6	46706	1.44	41	179	0	21	1017	177	1247	38344	740	46	88	358	19375	167	37	68	0	16	651	283	5074	84	697	26	12	0	0	41	170	358	9	58	24162	7455	0.332
272.8	17785.8	46202	1.81	14	136	0	0	940	184	1243	37461	664	13	62	288	18898	192	63	111	0	87	704	307	5136	0	714	62	0	0	79	66	167	349	0	202	24092	7435	0.329
273	17795	46020	1.41	20	197	0	26	875	202	1287	38208	587	32	38	286	18610	139	16	50	0	146	742	330	5052	19	760	75	0	0	10	0	163	341	6	109	24076	7318	0.329
273.2	17804.4	45662	1.45	26	120	0	23	936	180	1164	36510	572	38	52	292	19800	159	66	91	27	154	658	297	4830	11	718	78	0	0	21	32	118	339	33	120	23845	7299	0.327
273.4	17813.8	45626	1.38	48	148	0	61	928	188	1215	35668	625	0	60	237	22389	138	84	69	0	66	673	244	4852	36	634	37	30	22	58	63	202	370	9	95	23252	6893	0.329
273.6	17823.2	45263	1.34	26	132	0	38	868	170	1258	36283	704	18	61	224	21371	162	80	77	0	78	617	170	4714	0	663	48	0	0	26	71	176	327	0	92	22740	6914	0.327
273.8	17832.6	44571	1.44	29	142	0	0	863	180	1191	36597	619	32	48	283	18912	226	51	98	0	40	694	294	4781	6	828	34	16	9	0	165	151	412	0	0	23390	7092	0.326
274	17842	44122	1.39	23	157	0	21	891	229	1139	31765	610	25	41	280	17474	141	39	102	0	34	646	208	4613	48	662	13	0	37	0	31	33	386	5	0	23931	7251	0.328
274.2	17851.2	44354	1.34	44	143	0	25	933	158	1185	34853	543	12	40	297	18911	170	11	67	0	116	663	241	4669	48	660	75	0	54	0	208	0	352	0	90	23850	7318	0.318
274.4	17860.4	43976	1.31	48	168	0	17	800	153	1197	33576	646	38	65	286	19327	149	40	50	0	142	610	285	4357	0	652	18	0	0	96	58	35	321	5	86	23341	7119	0.327
274.6	17869.6	44293	1.59	19	180	0	34	907	193	1224	34383	688	0	85	264	19601	160	31	118	0	89	604	164	4384	0	671	28	20	0	73	87	144	424	27	0	23278	7031	0.329
274.8	17878.8	43327	1.44	27	163	0	12	895	211	1152	32656	616	29	53	260	18895	140	38	87	0	208	607	271	4428	64	768	22	16	0	52	16	110	306	0	0	22838	7070	0.326
275	17888	42857	1.33	17	122	0	25	869	186	1143	32554	715	45	40	269	18743	200	60	112	0	88	690	246	4463	0	754	4	0	4	26	145	117	463	0	122	22456	6799	0.326
275.2	17897.4	42651	1.38	31	99	0	13	897	187	983	28255	605	16	76	260	17535	155	48	113	0	88	560	219	4394	0	621	34	0	0	28	41	136	379	0	0	23255	7101	0.328
275.4	17906.8	42723	1.53	23	96	0	13	864	245	1000	30178	619	15	29	272	17718	172	96	69	0	126	663	254	4454	0	692	58	13	0	16	124	101	410	0	87	22929	7077	0.327
275.6	17916.2	42216	1.9	23	170	0	23	695	236	1179	32701	613	39	40	291	17655	131	50	36	0	69	502	268	4556	0	726	54	5	0	16	0	110	353	0	0	22084	6980	0.329
275.8	17925.6	42476	1.5	23	146	0	13	753	204	1141	35053	599	22	16	284	17623	137	11	54	0	69	625	232	4391	0	556	55	7	0	65	38	129	345	0	91	21922	6823	0.332
276	17935	42051	1.48	24	123	0	10	691	198	1087	32941	588	18	21	284	17792	164	35	51	0	145	583	139	4300	91	716	62	0	0	21	41	12	369	0	0	22067	6856	0.325
276.2	17944.4	41827	1.54	6	121	0	16	809	206	1066	29480	592	49	53	261	17340	131	76	57	20	58	681	231	4324	51	665	51	0	0	0	116	104	342	0	132	22443	7063	0.328
276.4	17953.8	41349	1.38	14	134	0	30	846	189	1049	29192	595	40	31	300	18823	153	13	67	0	45	655	266	4162	44	694	20	32	45	37	101	123	478	0	30	21938	6878	0.328
276.6	17963.2	40689	1.6	25	86	0	7	912	190	855	25672	557	35	77	256	17405	187	47	99	22	50	503	255	4046	0	720	29	0	0	50	152	141	349	51	89	21623	6892	0.332
276.8	17972.6	41274	1.34	42	97	0	8	867	205	1001	27879	572	35	30	285	18103	152	43	62	0	45	565	259	4052	0	631	12	0	0	66	36	115	330	0	22	22074	6965	0.330
277	17982	41469	1.38	12	110	0	29	849	165	938	26593	603	16	47	228	19515	151	18	15	0	72	637	219	3748	14	698	0	34	0	0	100	125	372	0	0	21769	6673	0.331
277.2	17991.2	41137	1.37	17	98	0	32	909	203	851	25042	564	0	16	290	19982	130	18	35	0	101	556	212	3807	100	648	0	24	0	9	100	149	371	0	117	22130	6649	0.330
277.4	18000.4	39959	1.35	18	111	0	20	872	194	905	24823	533	26	41	246	18394	136	0	80	0	19	556	233	3696	0	617	10	11	0	0	54	130	391	0	18	21273	6560	0.334
277.6	18009.6	39046	1.34	27	134	0	16	842	202	900	24050	501	24	32	210	16495	112	46	52	0	116	506	128	3817	0	663	0	22	0	44	75	98	280	0	0	21337	6461	0.328
277.8	18018.8	39483	1.38	19	79	0	13	954	191	892	25661	487	6	48	252	17282	156	35	113	0	105	604	244	4039	58	603	27	0	0	48	61	82	363	0	11	21120	6391	0.331
278	18028	39917	1.45	20	97	0	21	862	190	908	26480	558	16	55	240	17139	101	35	26	0	80	519	112	4028	0	657	0	0	0	13	151	0	301	0	0	20976	6589	0.334
278.2	18037.4	40104	1.56	15	90	0	11	904	213	922	24609	500	0	38	249	16641	163	54	134	0	74	568	183	3951	0	650	61	18	0	16	77	87	387	0	0	21862	6804	0.332
278.4	18046.8	40040	1.78	15	82	0	10	839	185	950	24989	531	30	43	260	17657	144	0	38	0	70	542	205	3964	0	651	24	24	19	45	60	133	387	0	144	21398	6755	0.332
278.6	18056.2	39640	1.82	0	85	0	26	957	207	865	24974	523	10	28	234	17310	142	22	93	0	132	564	310	3927	0	682	39	0	38	38	109	7	320	0	52	21635	6703	0.326
278.8	18065.6	40670	1.38	25	96	0	0	876	189	939	25853	578	0	84	242	18568	155	33	59	0	41	553	230	3846	0	681	30	25	0	56	0	85	377	14	63	21829	6544	0.333
279	18075	41527	1.42	15	124	0	38	793	212	1004	27162	531	24	36	291	20866	151	37	35	0	84	516	214	3912	19	636	52	0	0	32	41	60	352	0	0	22045	6624	0.333
279.2	18084.4	41166	1.53	21	100	0	27	861	219	999	26298	583	12	52	266	18242	156	67	65	0	81	562	235	4038	0	568	13	5	0	27	127	142	364	0	45	21989	6757	0.333
279.4	18093.8	40789	1.32	15	119	0	9	718	238	1017	27638	605	22	63	267	17138	138	67	100	0	80	544	204	4311	0	696	18	0	0	33	116	0	329	0	0	21652	6550	0.337
279.6	18103.2	40105	1.96	27	130	0	43	748	238	1010	27857	593	63	63	261	17541	97	84	66	0	193	657	187	4194	0	625	0	38	0	41	110	150	316	0	90	21016	6405	0.334
279.8	18112.6	40425	1.32	16	111	0	28	726	199	1096	30303	692	37	35	260	17851	126	37	97	0	153	606	263	4146	0	706	0	12	35	68	79	209	308	0	107	21434	6676	0.333
280	18122	41452	1.32	23	118	0	0	727	180	1064	31435	664	0	58	297	17978	162	28	68	0	120	524	267	3963	0	602	6	28	0	73	12	287	355	0	0	21424	6428	0.336
280.2	18131.4	40735	1.48	0	108	0	22	760	186	1026	28352	553	0	16	280	16707	134	47	60	0	104	581	168	4203	42	644	27	0	11	0	23	147	292	20	22	21908	6813	0.333
280.4	18140.8	38123	1.27	34	122	0	6	706	216	905	26290	527	52	36	242	15521	148	58	85	0	39	520	195	3836	16	704	32	0	0	0	83	69	293	0	30	20347	6374	0.336
280.6	18150.2	38485	1.46	11	88	0	26	711	238	1022	29018	575	27	34	284	16467	151	36	31	0	108	478	267	3920	0	593	30	14	0	22	81	0	301	5	11	19694	6095	0.337
280.8	18159.6	38891	1.4	15	127	0	0	553	202	1036	30478	614	23	34	253	16822	109	61	109	0	65	507	201	4021	0	634	0	26	0	0	55	0	306	0	44	19842	6157	0.336
281	18169	40361	1.61	22	124	0	8	670	242	1125	33080	647	52	56	261	17457	154	21	81	0	114	509	196	4025	95	641	60	0	0	36	167	40	380	0	0	20700	6394	0.333
281.2	18178.4	40011	1.46	10	124	0	23	731	237	1132	32340	606	10	75	279	16861	134	64	87	0	90	681	187	4142	13	586	32	0	0	97	142	0	328	0	104	20900	6548	0.326
281.4	18187.8	40654	1.28	8	111	0	4	681	250	1113	32427	606	18	71	279	15992	110	89	77	0	85	599	107	4232	0	676	12	24	0	75	29	123	312	21	58	21306	6397	0.334
281.6	18197.2	39963	1.47	14	105	0	17	739	248	1007	31671	571	18	24	257	15539	166	36	63	0	179	517	239	4203	0	581	24	11	0	68	137	108	281	0	119	20738	6396	0.334
281.8	18206.6	40047	1.41	31	133	0	26	627	246	1021	32810	559	10	33	253	16552	125	0	77	0	159	513	209	4112	38	678	59	0	0	0	50	50	320	41	65	20631	6381	0.335
282	18216	40589	1.43	35	150	0	27	760	224	1133	33961	523	31	46	236	17726	165	46	111	0	114	575	241	4135	37	617	75	0	22	12	46	74	297	19	38	20707	6430	0.328
282.2	18225.2	41095	1.57	40	106	0	27	677	264	1076	33540	623	33	50	222	18452	133	13	76	0	80	521	248	4007	0	697	42	8	0	6	98	172	322	0	23	21461	6597	0.330
282.4	18234.4	40778	1.75	15	122	0	27	669	237	1048	31807	595	42	57	191	18594	104	51	84	0	70	545	205	4005	0	567	60	5	0	18	52	91	309	0	0	21608	6472	0.330
282.6	18243.6	40519	1.5	11	121	0	16	744	247	1082	30447	593	0	37	232	17975	131	32	71	0	132	586	298	4069	0	653	75	0	79	46	203	4	345	0	14	21397	6352	0.327
282.8	18252.8	40271	1.36	27	138	0	0	821	217	1026	29831	558	37	11	285	18177	176	85	80	21	81	515	161	4045	0	615	46	0	0	74	117	93	336	0	72	21337	6738	0.324
283	18262	41185	1.31	51	103	0	29	744	225	1105	31494	561	5	52	207	18821	139	39	50	0	112	569	212	3964	23	684	71	0	0	0	86	104	337	5	29	21600	6467	0.330
283.2	18271.4	39170	1.49	22	126	0	0	709	253	1051	28959	551	41	33	229	17645	149	0	76	0	50	564	191	3957	0	630	15	32	0	0	100	100	316	0	25	20904	6343	0.323
283.4	18280.8	39647	1.45	34	105	0	0	720	200	933	27323	538	15	21	222	16523	104	64	50	0	67	600	258	3962	68	709	17	0	0	29	93	122	279	8	0	21100	6646	0.329
283.6	18290.2	37851	1.42	40	128	0	4	689	228	919	25892	449	13	47	222	15199	106	6	68	0	106	550	286	3663	79	727	33	0	47	0	72	52	307	10	0	20793	6402	0.326
283.8	18299.6	39083	1.6	35	107	0	0	630	238	1058	28705	528	54	8	202	17309	110	31	56	0	61	511	215	3652	0	603	6	20	23	31	45	177	309	0	47	20866	6260	0.331
284	18309	39630	1.49	0	133	0	0	618	241	1113	29539	616	0	51	238	18463	128	39	46	0	108	620	162	3880	0	490	40	0	35	108	129	169	390	21	73	20164	6390	0.333
284.2	18318.4	40617	1.43	44	114	0	0	657	216	1108	31157	573	39	0	291	18623	169	39	89	27	88	506	287	4077	0	647	36	20	34	81	293	100	379	0	126	20923	6573	0.330
284.4	18327.8	39810	1.5	32	130	0	10	673	252	1123	31000	544	12	54	265	17746	135	48	85	0	135	499	135	3806	0	567	86	0	40	65	137	73	326	23	70	20338	6329	0.328
284.6	18337.2	38815	1.42	15	141	0	0	688	218	1058	29477	582	35	50	244	18591	139	46	100	0	95	479	119	3675	0	575	55	0	0	29	129	131	362	0	0	20009	6252	0.325
284.8	18346.6	38761	1.43	27	157	0	42	718	253	1136	28442	617	40	49	258	19053	175	38	70	0	48	496	172	3626	0	609	0	41	15	46	31	95	385	0	0	20546	6086	0.325
285	18356	39458	1.46	28	112	0	20	727	220	1045	26967	620	31	5	243	21500	141	17	36	0	10	527	230	3416	9	631	49	0	0	13	36	176	429	0	16	20592	6357	0.327
285.2	18365.4	39709	1.4	31	169	0	8	694	196	1060	28502	578	12	37	223	20836	115	0	44	0	103	493	236	3607	88	644	11	24	11	11	103	0	408	0	60	20825	6370	0.326
285.4	18374.8	40767	1.29	0	137	0	0	627	214	1040	30307	611	24	35	222	20739	100	34	76	0	102	526	279	3718	0	588	59	0	14	43	105	156	363	0	64	20718	6320	0.331
285.6	18384.2	40468	1.32	28	145	0	0	682	215	1044	29165	622	35	28	245	21605	161	31	58	0	31	498	201	3544	0	779	22	9	0	24	79	155	329	0	72	20695	6501	0.331
285.8	18393.6	40625	1.58	0	129	0	27	663	246	1101	29754	638	30	36	295	20152	165	52	48	0	90	547	168	3780	22	571	0	25	0	0	95	0	327	31	88	20845	6370	0.330
286	18403	40699	1.37	48	163	0	15	693	189	1128	30766	643	48	57	249	20309	171	25	97	0	111	507	261	3815	0	656	0	9	7	45	69	164	411	8	0	20735	6311	0.331
286.2	18412.4	40859	1.63	41	168	0	20	690	231	1245	31459	644	54	31	251	19622	127	0	69	0	59	563	153	3851	0	562	69	0	25	34	102	54	312	0	83	20994	6267	0.329
286.4	18421.8	41039	1.53	62	149	0	17	716	240	1254	33185	582	0	46	253	19480	227	56	43	0	50	572	248	4188	0	566	93	0	0	58	53	160	372	0	0	21067	6554	0.328
286.6	18431.2	41421	1.43	41	147	0	23	701	231	1284	33452	613	35	34	245	19841	145	49	94	0	0	557	179	4070	85	665	74	0	0	81	70	107	339	0	29	20810	6580	0.328
286.8	18440.6	41338	1.39	41	114	0	0	727	244	1201	32879	654	51	56	269	18916	162	21	45	0	84	523	230	4142	0	614	49	0	10	0	108	57	331	0	73	21116	6763	0.326
287	18450	39856	1.45	51	138	0	17	665	269	1099	30316	636	0	46	248	17813	128	63	94	0	84	561	267	3847	26	585	15	17	32	110	196	15	382	0	100	20580	6477	0.332
287.2	18459.2	38382	1.59	41	152	0	10	577	253	1049	28457	593	46	58	252	17052	104	25	66	30	74	589	177	3684	0	602	54	0	0	22	129	170	267	19	0	20138	6228	0.330
287.4	18468.4	39730	1.42	38	106	0	0	679	248	1023	30350	639	35	24	249	18401	163	84	105	40	165	474	193	3972	0	582	9	35	0	54	144	110	322	25	25	20416	6234	0.326
287.6	18477.6	41201	1.41	36	124	0	24	769	255	1136	30965	665	54	53	221	21419	153	37	74	0	55	528	312	3738	16	731	32	0	19	36	101	198	359	0	60	20914	6552	0.323
287.8	18486.8	40968	1.41	19	144	0	40	773	262	1260	31671	615	15	52	266	21075	156	64	74	0	67	529	280	3841	0	656	18	21	7	86	87	141	367	0	150	20852	6436	0.325
288	18496	42095	1.54	29	135	0	90	757	228	1144	30120	653	0	29	204	28372	141	5	74	0	46	432	254	3872	0	553	50	0	0	15	147	46	417	8	64	20068	6318	0.325
288.2	18505.4	42007	1.52	5	173	0	39	724	215	1191	30465	607	36	56	211	23165	181	64	84	0	71	525	246	3846	0	595	76	0	0	0	140	123	332	0	95	21265	6600	0.326
288.4	18514.8	41451	1.4	27	178	0	20	696	188	1178	31571	665	9	68	231	20926	132	39	49	0	120	534	229	3789	0	649	64	0	0	87	130	131	383	22	0	21086	6344	0.327
288.6	18524.2	41726	1.41	48	178	0	17	672	211	1215	33373	641	36	52	261	21348	170	42	72	0	72	603	235	3878	57	707	42	8	27	43	119	145	446	0	21	20588	6596	0.326
288.8	18533.6	41863	1.25	34	148	0	17	669	219	1228	31412	634	47	48	240	21276	160	63	85	0	68	514	213	3937	0	746	9	6	21	46	52	118	399	21	0	21547	6597	0.326
289	18543	41518	1.43	23	137	0	17	772	207	1144	29793	549	70	11	254	20716	121	39	30	0	9	610	180	4125	0	570	37	0	0	11	68	185	396	0	0	21228	6450	0.326
289.2	18552.2	41739	1.4	41	137	0	24	771	237	1224	32067	681	57	10	298	20362	165	90	97	0	69	508	213	4156	0	679	46	7	0	30	18	112	371	0	23	21260	6682	0.324
289.4	18561.4	41674	1.34	41	144	0	20	801	231	1161	32480	642	0	47	248	19934	151	51	57	0	83	503	188	4010	25	560	53	0	0	80	169	102	341	0	0	21018	6571	0.324
289.6	18570.6	41331	1.49	19	169	0	16	799	220	1231	32496	647	76	46	241	18976	115	57	85	0	66	567	267	4054	0	673	32	0	0	34	108	7	274	0	14	21510	6694	0.325
289.8	18579.8	41082	1.45	0	141	0	8	748	184	1199	32658	634	42	41	239	18662	142	38	95	0	59	520	234	4131	0	612	49	8	0	0	30	108	367	0	4	21393	6649	0.320
290	18589	41172	1.52	43	133	0	0	769	214	1127	33034	638	18	30	267	17792	184	112	100	29	69	644	246	4245	0	723	52	0	0	73	145	108	391	0	51	20958	6537	0.324
290.2	18598.2	41409	1.75	45	145	0	32	849	224	1150	32161	669	20	59	232	18981	162	58	82	0	94	598	212	4304	0	662	46	8	0	7	86	187	270	0	78	21445	6664	0.323
290.4	18607.4	41215	1.46	14	139	0	60	821	199	1139	28357	656	35	27	226	24263	121	26	77	0	17	553	199	3830	0	665	8	34	0	0	118	26	428	0	0	20491	6399	0.325
290.6	18616.6	41175	1.38	26	157	0	27	749	196	1197	32206	708	0	49	261	20900	172	33	90	0	123	549	330	4042	0	601	46	14	0	101	156	82	344	8	149	20894	6557	0.324
290.8	18625.8	40770	1.33	24	179	0	0	770	182	1244	31818	726	21	39	251	20272	148	7	54	0	76	599	196	4065	68	658	0	0	14	60	44	167	308	0	64	20803	6612	0.324
291	18635	40800	1.6	27	149	0	18	782	233	1128	30882	682	35	7	246	19584	133	0	91	0	154	555	348	3814	0	700	47	11	82	52	55	43	354	24	0	20959	6573	0.326
291.2	18644.4	40470	1.41	10	129	0	21	707	208	1160	30751	666	29	45	277	19126	148	10	107	18	119	532	230	3871	53	768	6	43	22	51	127	121	345	0	63	21205	6523	0.328
291.4	18653.8	40868	1.43	9	172	0	35	901	232	1135	31075	579	37	50	279	20260	145	0	106	0	10	589	189	3937	19	649	83	0	28	46	121	48	392	0	90	20726	6311	0.328
291.6	18663.2	42024	1.35	46	139	0	65	819	213	1158	30049	595	0	45	190	26617	138	51	55	0	12	458	229	3800	0	636	44	17	0	0	44	127	506	0	10	20740	6520	0.328
291.8	18672.6	40495	1.46	21	139	0	19	779	202	1117	29611	681	38	29	279	19303	140	44	67	0	0	547	185	3755	0	534	34	7	0	15	0	0	373	0	0	21110	6596	0.327
292	18682	40709	1.62	23	153	0	27	769	235	1198	29994	636	51	54	242	20681	143	52	110	44	120	576	351	4009	62	808	39	0	0	63	133	200	387	0	10	21160	6572	0.323
292.2	18691.2	40079	1.38	0	140	0	14	709	248	1157	30078	581	32	54	247	18449	161	28	143	0	22	545	172	3849	0	559	69	0	14	0	38	108	368	0	39	21512	6334	0.325
292.4	18700.4	39353	1.49	9	114	0	17	693	237	1038	29121	606	24	24	209	17975	157	31	48	0	133	569	236	3837	0	526	10	13	9	26	52	80	307	0	0	20705	6209	0.327
292.6	18709.6	40450	1.65	21	127	0	6	637	224	1249	30695	686	17	42	309	20095	155	61	104	15	64	530	197	3943	36	538	54	15	0	13	113	0	366	0	22	21030	6307	0.325
292.8	18718.8	40663	1.36	0	174	0	19	622	225	1287	32518	684	15	38	209	19240	122	16	129	0	39	618	201	4013	0	589	24	23	34	53	135	0	377	0	83	20966	6345	0.323
293	18728	40663	1.4	32	164	0	0	636	239	1295	31872	689	24	49	288	19695	127	34	109	0	63	572	199	3976	0	631	16	12	6	23	68	7	373	0	0	20825	6459	0.323
293.2	18737.2	41554	1.4	31	142	0	0	622	235	1209	33359	657	10	59	270	19419	159	34	108	0	55	537	244	4191	0	520	55	14	0	57	70	68	360	0	0	21115	6398	0.328
293.4	18746.4	40614	1.53	0	140	0	7	606	241	1160	30914	632	0	16	274	18348	127	62	36	0	53	469	296	3911	0	681	57	14	0	55	74	206	353	21	11	21126	6622	0.329
293.6	18755.6	39820	1.54	38	171	0	19	624	266	1072	30479	689	32	32	235	17313	143	95	47	0	146	508	219	3917	0	663	47	21	0	34	50	122	313	0	64	20929	6340	0.323
293.8	18764.8	39580	1.39	28	129	0	0	603	218	1155	30264	560	7	20	240	17570	124	23	100	46	90	600	191	3834	0	582	69	0	54	38	96	127	350	0	0	21061	6513	0.324
294	18774	39245	1.54	0	122	0	0	644	241	1108	29826	635	47	22	268	17157	168	123	69	0	71	529	325	3925	0	690	0	51	0	42	85	172	272	10	112	21247	6432	0.324
294.2	18783.2	39075	1.34	20	149	0	0	576	219	1127	28652	681	0	33	220	17404	106	13	76	0	34	534	163	3860	0	578	12	0	60	95	119	96	340	0	67	20761	6385	0.327
294.4	18792.4	38687	1.4	12	124	0	9	645	249	1078	29244	573	16	21	239	15957	156	41	39	0	63	440	200	3731	0	703	27	37	8	0	125	0	291	0	53	20489	6312	0.330
294.6	18801.6	38353	1.39	27	106	0	19	604	229	1021	26628	560	17	42	228	16853	159	18	63	0	154	522	251	3847	0	612	52	26	29	0	124	31	357	0	64	20984	6304	0.328
294.8	18810.8	38089	1.31	23	108	0	8	590	255	1084	27116	525	58	47	179	17639	142	28	41	0	62	537	216	3768	0	647	25	0	22	25	34	19	278	26	70	20520	6003	0.326
295	18820	37995	1.29	11	100	0	0	584	255	951	26930	570	51	35	187	16260	150	39	74	0	101	503	286	3826	17	518	51	0	28	0	62	46	335	41	123	20071	6049	0.331
295.2	18829.2	37837	1.21	18	90	0	6	578	245	1014	26688	554	0	22	194	16491	92	14	65	0	107	532	243	3647	0	577	40	0	0	0	28	32	290	0	0	20665	6123	0.327
295.4	18838.4	37748	1.64	27	107	0	25	587	242	972	27065	541	33	26	228	16378	171	70	28	0	59	519	117	3684	0	645	39	30	0	16	64	36	225	18	44	20261	6117	0.327
295.6	18847.6	37910	1.61	15	125	0	0	596	283	1015	27277	523	16	17	258	15844	112	41	84	0	103	484	194	3837	0	647	57	0	0	54	107	37	288	0	0	20187	6290	0.329
295.8	18856.8	37969	1.81	23	150	0	35	604	266	1006	27712	606	37	49	205	16924	145	36	78	0	15	485	157	3751	28	581	6	18	0	62	88	114	270	0	84	19927	6178	0.330
296	18866	38173	1.6	22	122	0	0	640	282	1069	27960	610	8	45	228	17259	157	21	109	0	38	530	281	3716	0	548	66	21	83	18	26	83	317	0	90	20238	6419	0.325
296.2	18875.2	38970	1.39	28	159	0	0	623	243	1157	29912	604	4	43	234	17169	127	68	65	0	46	604	271	3968	0	664	83	9	15	0	55	143	401	0	0	21036	6212	0.319
296.4	18884.4	39105	1.59	13	159	0	0	662	227	1131	30725	624	21	67	298	17628	200	87	71	7	99	482	148	3918	0	593	67	15	0	63	151	91	298	0	128	20757	6237	0.320
296.6	18893.6	39866	1.56	13	160	0	0	710	233	1111	30509	585	20	58	278	18046	109	0	55	0	73	513	266	3855	0	555	74	0	55	19	0	0	295	0	82	20865	6309	0.321
296.8	18902.8	40559	1.36	44	167	0	13	702	188	1157	31626	679	53	33	289	19316	177	42	101	0	106	558	338	3937	30	722	42	19	0	50	75	63	379	20	86	21056	6528	0.323
297	18912	40835	1.55	6	158	0	0	663	259	1189	33448	821	27	41	268	18858	160	48	109	0	123	522	287	4036	0	664	11	52	11	55	34	0	391	0	118	21168	6559	0.320
297.2	18921.2	41355	1.48	0	139	0	5	663	193	1228	32988	718	30	11	306	20722	139	83	168	49	82	510	127	3946	9	607	4	33	0	37	0	107	394	0	45	20904	6525	0.323
297.4	18930.4	41111	1.36	14	121	0	0	648	200	1174	30334	624	8	54	327	21811	139	52	55	0	142	535	227	3466	0	593	75	0	0	127	39	158	371	0	49	20757	6421	0.325
297.6	18939.6	41092	1.32	30	166	0	0	667	200	1234	31551	763	36	20	335	21959	136	57	80	0	76	610	299	3531	0	717	18	17	0	96	84	55	438	0	14	21142	6432	0.324
297.8	18948.8	41277	1.36	39	148	0	0	733	247	1215	31588	690	0	59	327	21115	146	42	12	0	0	488	344	3675	18	683	57	0	0	54	33	85	393	0	42	21740	6574	0.321
298	18958	41815	1.35	28	196	0	0	626	234	1389	30275	865	37	0	361	22276	162	42	103	0	115	521	215	3514	0	680	0	43	0	37	94	14	425	0	0	21529	6391	0.329
298.2	18967.4	41573	1.47	39	161	0	66	646	236	1199	29444	704	50	44	349	25795	113	0	68	0	30	535	308	3415	0	502	48	19	0	17	120	114	426	0	56	20875	6220	0.328
298.4	18976.8	40602	1.6	15	170	0	47	576	274	1263	31658	731	42	14	315	19109	130	62	64	0	88	508	211	3663	0	727	24	56	7	25	20	0	362	42	56	20470	6241	0.332
298.6	18986.2	41000	1.64	41	141	0	25	651	238	1256	34353	715	50	26	274	18173	146	34	95	0	116	573	159	4046	0	656	18	16	0	17	86	80	309	0	0	20987	6422	0.329
298.8	18995.6	41896	1.7	20	145	0	21	759	230	1333	35129	724	46	39	312	18918	198	24	31	19	77	539	262	4242	58	577	7	30	0	54	42	59	394	0	56	21196	6636	0.324
299	19005	43273	1.4	31	169	0	29	817	229	1256	34756	714	13	50	263	21936	181	128	130	0	107	613	189	4042	57	686	34	12	0	37	99	123	416	0	0	21862	6715	0.324
299.2	19014
299.4	19023
299.6	19032
299.8	19041
300	19050
300.2	19059.2
300.4	19068.4	42030	1.47	20	172	0	0	702	175	1329	32748	749	27	80	320	22575	190	40	81	0	129	489	302	3528	19	637	7	26	0	29	107	127	452	0	70	21005	6498	0.333
300.6	19077.6	42666	1.41	43	178	0	5	792	237	1296	33641	638	51	62	265	21508	155	37	94	0	57	509	240	3684	60	727	37	22	0	47	111	13	378	45	46	22170	6708	0.326
300.8	19086.8	44716	1.49	28	200	0	16	731	169	1459	34103	751	7	52	323	26393	138	49	90	0	69	602	296	3761	0	650	20	44	0	53	170	0	403	0	142	22340	6710	0.328
301	19096	45019	1.61	40	169	0	14	789	211	1385	32040	764	7	71	333	26511	148	61	53	42	47	677	242	3673	33	667	36	9	0	62	112	186	348	0	86	22890	6845	0.327
301.2	19105.2	44889	1.55	32	181	0	18	791	172	1411	32546	797	55	41	398	27184	149	67	91	0	6	599	377	3678	0	700	36	13	0	0	54	162	440	0	0	22658	6930	0.323
301.4	19114.4	45068	1.66	32	167	0	29	756	197	1497	33424	880	0	68	393	26497	187	81	78	0	44	572	288	3547	0	608	73	20	9	71	122	135	505	0	102	22999	6846	0.324
301.6	19123.6	44910	1.73	27	180	0	0	811	216	1502	34393	841	107	74	381	26047	173	77	168	9	49	633	285	3822	0	630	71	11	0	129	93	133	365	0	53	22666	6775	0.325
301.8	19132.8	46121	1.61	7	214	0	38	732	235	1490	35107	864	10	79	335	29830	154	90	117	0	99	573	177	4081	0	595	62	24	0	123	19	148	505	0	99	22056	6573	0.330
302	19142	48157	1.55	24	186	0	32	800	201	1390	32576	810	71	29	293	39427	172	48	109	0	77	524	295	4154	50	611	0	39	7	7	124	149	529	0	92	21751	6762	0.334
302.2	19151	47454	1.51	27	189	0	43	726	149	1466	34620	865	8	38	357	34207	149	96	90	0	20	573	209	4444	0	631	40	0	0	50	65	263	463	0	48	22033	6676	0.336
302.4	19160	46944	1.42	40	168	0	21	822	185	1521	34416	842	20	59	518	30239	168	60	115	0	89	628	384	4336	25	635	35	13	47	86	92	179	458	14	128	22474	6677	0.336
302.6	19169	46062	1.49	29	189	0	8	818	217	1527	34648	784	58	83	550	28101	177	78	61	0	132	671	185	4279	0	587	91	9	0	37	183	48	419	13	195	22023	6866	0.332
302.8	19178	45663	1.39	51	175	0	37	791	179	1469	34990	831	79	34	541	26694	182	96	75	0	69	561	261	4183	43	633	42	12	0	87	138	149	453	0	9	22416	6830	0.332
303	19187	45697	1.38	28	190	0	8	760	178	1463	35671	768	22	53	459	25175	214	95	163	0	70	556	310	4309	0	521	58	0	0	76	121	62	373	0	61	22754	6626	0.330
303.2	19196	45645	1.37	49	223	0	0	732	198	1580	36442	762	69	30	305	23830	166	75	137	0	127	686	274	4374	0	680	46	0	27	63	74	178	399	0	124	22850	6771	0.330
303.4	19205	45752	1.51	15	223	0	12	753	178	1542	38576	775	39	61	304	23948	164	90	115	5	113	566	302	4340	41	706	81	16	0	115	169	193	439	0	37	23115	7250	0.327
303.6	19214	45835	1.72	21	230	0	6	802	198	1390	39966	854	47	70	315	22608	182	126	156	0	34	646	332	4273	0	768	32	40	0	98	104	127	354	0	53	23095	7161	0.327
303.8	19223	46113	1.31	32	168	0	31	833	177	1552	38507	782	74	40	281	24789	183	14	106	0	0	612	333	4188	59	742	58	0	28	72	39	193	341	19	104	22661	6993	0.332
304	19232	45011	1.48	38	225	0	0	772	207	1427	37165	818	73	55	288	24252	189	28	99	0	11	596	314	4120	19	635	52	0	0	0	73	50	421	0	56	22191	6830	0.326
304.2	19239	45730	1.31	78	198	0	26	856	192	1443	35856	851	35	62	341	24303	218	57	145	6	43	678	350	4091	41	740	45	22	17	7	158	132	488	19	171	22827	6836	0.331
304.4	19246	44351	1.44	15	194	0	11	853	172	1446	34410	721	5	36	324	22652	174	0	88	0	47	571	361	3980	0	776	57	26	40	100	72	255	353	13	162	22528	6792	0.326
304.6	19253	44907	1.39	38	174	0	0	733	199	1449	35214	758	53	61	347	23528	147	28	109	5	58	566	263	4099	0	712	83	0	0	58	84	49	380	0	176	22140	7071	0.333
304.8	19260	44931	1.43	20	194	0	34	749	147	1516	35780	808	47	89	351	24165	154	67	111	0	154	642	381	4276	0	753	46	0	0	74	95	190	427	30	130	22157	6970	0.328
305	19267	44243	1.4	70	236	0	15	754	192	1389	36384	821	21	16	340	22178	191	38	83	0	35	583	281	4243	0	707	30	9	36	0	0	198	405	16	50	21987	6928	0.327
305.2	19272	44965	1.37	12	205	0	28	736	172	1552	38004	701	35	70	349	21803	210	109	145	38	73	562	261	4471	109	709	87	0	0	99	139	169	430	20	126	22353	6822	0.328
305.4	19277	45803	1.47	36	247	0	51	809	171	1663	38223	882	39	53	438	23262	176	43	142	0	129	660	353	4516	0	694	17	39	0	0	72	36	471	5	146	22168	6964	0.333
305.6	19282	44155	1.57	28	186	0	0	769	163	1588	36448	753	45	59	328	22399	152	89	101	0	52	560	312	4390	0	769	61	14	0	70	40	64	434	0	129	21932	6822	0.330
305.8	19287	44864	1.43	27	195	0	10	712	190	1527	37181	869	46	60	336	23796	250	86	131	0	87	710	296	4308	11	706	0	21	0	72	177	104	433	0	124	21455	6855	0.332
306	19292	45366	1.43	24	212	0	22	782	151	1518	36582	892	49	62	450	24415	186	99	170	0	69	523	388	4293	0	784	44	0	0	19	48	139	381	0	0	22454	6966	0.330
306.2	19297	45922	1.76	21	166	0	10	762	165	1618	33926	838	42	56	389	26605	205	64	121	6	63	570	319	3985	0	746	63	40	0	83	123	272	473	7	174	22936	6844	0.330
306.4	19302	47122	1.36	59	192	0	9	789	134	1602	33051	926	28	85	361	29130	218	0	30	0	99	622	399	3882	0	767	14	39	0	5	163	161	494	0	89	23366	6995	0.336
306.6	19307	48295	1.43	19	159	0	16	834	162	1456	30216	813	64	40	384	35491	181	90	62	0	37	661	292	3700	0	693	20	46	26	41	58	160	612	14	22	23060	6903	0.337
306.8	19312	48183	1.5	33	132	0	26	865	192	1378	28952	750	46	60	295	38540	139	0	63	0	60	594	388	3491	0	679	46	7	33	0	158	124	613	0	86	22630	6889	0.339
307	19317	45741	1.51	28	211	0	18	796	149	1422	31519	822	21	84	337	27825	165	38	69	0	45	511	318	3683	95	695	64	0	0	14	83	7	453	0	69	22960	6993	0.334
307.2	19322.2	46102	1.6	28	236	0	5	809	191	1554	34383	850	31	50	391	27110	221	51	125	0	88	641	287	3962	0	766	64	32	0	0	42	141	419	5	81	22859	6915	0.331
307.4	19327.4	46211	1.56	53	168	0	41	795	176	1620	35681	811	29	81	346	26133	195	78	118	5	56	644	358	4352	0	714	74	10	0	19	68	196	416	0	210	22696	7047	0.334
307.6	19332.6	45651	1.41	22	196	0	12	757	171	1465	34659	880	33	53	402	25699	181	32	69	0	85	612	252	4325	0	572	31	4	0	64	26	42	394	0	73	22869	7217	0.327
307.8	19337.8	46065	1.46	20	253	0	13	795	173	1583	36301	855	69	37	381	24946	177	124	133	62	152	640	410	4348	0	634	67	0	0	50	196	183	402	0	199	22721	7047	0.331
308	19343	45909	1.41	25	245	0	19	748	189	1604	37424	843	0	44	359	23893	200	8	114	0	63	645	249	4388	67	727	46	20	0	0	146	191	425	0	37	23306	7003	0.331
308.2	19347.8	46167	1.38	31	224	0	35	695	162	1562	36774	818	22	83	345	24419	198	92	158	0	111	688	398	4654	0	686	95	0	0	53	167	266	429	0	67	22842	6851	0.332
308.4	19352.6	45740	1.52	41	216	0	9	737	183	1536	37725	874	49	77	347	23339	214	97	105	0	34	582	334	4573	0	617	60	6	0	75	75	213	457	0	72	22660	6888	0.328
308.6	19357.4	46151	1.59	30	230	0	24	688	196	1657	38445	921	50	73	400	24372	192	93	181	0	105	650	355	4648	0	703	48	22	17	81	101	189	458	0	130	22840	7072	0.331
308.8	19362.2	45534	1.45	24	184	0	6	765	222	1507	34494	831	37	70	377	23763	206	76	154	7	136	666	369	4450	0	689	50	5	0	33	75	128	448	0	84	22977	7184	0.328
309	19367	46028	1.54	41	166	0	0	786	203	1546	36203	852	23	87	349	24534	179	18	74	0	54	639	310	4490	45	779	63	21	13	19	92	224	441	0	117	22933	7026	0.332
309.2	19372	45700	1.57	23	222	0	53	707	199	1541	36824	834	64	76	366	25136	184	67	79	0	55	607	319	4558	0	614	70	29	0	0	31	81	413	0	77	22792	7053	0.330
309.4	19377	45659	1.48	24	221	0	0	691	207	1541	37483	832	0	62	356	24248	141	111	165	0	119	669	316	4394	21	575	54	13	26	53	99	101	340	0	186	22832	7107	0.330
309.6	19382	45585	1.53	0	164	0	0	710	196	1637	38236	860	26	97	370	23217	163	88	109	0	47	556	314	4469	45	844	84	0	0	37	96	121	398	0	46	23003	7189	0.327
309.8	19387	44660	1.54	56	211	0	9	778	203	1509	35784	886	69	44	389	22106	153	102	127	0	121	680	304	4388	42	603	16	37	48	78	21	27	316	0	52	23153	6901	0.325
310	19392	44612	1.4	8	242	0	0	695	185	1473	37143	827	43	46	329	22802	204	108	143	0	129	550	226	4310	110	527	57	7	0	52	71	147	435	0	139	22736	6966	0.324
310.2	19397	44999	1.4	45	222	0	16	658	179	1656	37366	833	55	69	301	23395	193	43	131	0	65	683	345	4295	12	824	49	0	5	41	89	184	400	0	40	23307	6926	0.326
310.4	19402	44423	1.37	40	186	0	25	670	191	1484	36940	792	63	23	353	22477	188	75	75	0	63	655	330	4193	0	689	57	6	0	56	131	27	409	0	0	22357	6864	0.328
310.6	19407	44451	1.41	28	201	0	0	687	172	1468	37076	802	0	55	296	22474	182	85	82	0	127	561	388	4256	52	731	28	16	0	29	152	289	381	6	71	22344	6748	0.327
310.8	19412	44105	1.29	22	187	0	12	673	178	1429	36299	763	16	26	331	22560	150	62	99	0	69	516	243	4057	0	744	49	0	0	5	55	118	331	0	128	21869	6844	0.333
311	19417	43707	1.39	25	182	0	12	685	195	1387	35398	761	30	56	353	22799	202	59	122	0	107	581	240	3971	28	725	55	22	0	30	73	82	429	18	36	21836	6632	0.330
311.2	19421.8	43983	1.48	38	192	0	20	703	198	1446	35807	805	48	27	380	22363	162	75	92	0	91	584	187	4095	0	710	24	0	0	95	142	106	399	0	48	22058	6669	0.329
311.4	19426.6	44590	1.45	16	221	0	12	697	189	1509	37543	813	43	21	367	22756	201	48	155	0	138	564	290	4118	0	648	37	0	0	50	129	169	389	0	72	22165	6687	0.331
311.6	19431.4	44422	1.35	26	222	0	4	723	133	1427	36582	794	0	76	395	22679	165	52	92	0	64	738	225	4350	83	701	27	43	0	155	122	30	476	0	89	22181	6906	0.332
311.8	19436.2	44821	1.38	32	191	0	22	729	160	1509	36329	814	55	47	335	24163	213	91	111	0	104	653	362	4226	0	749	17	37	20	89	113	236	437	0	94	22443	6850	0.331
312	19441	44181	1.43	5	206	0	0	686	205	1554	36591	779	43	61	317	22321	140	38	115	0	112	585	254	4298	25	698	52	12	13	57	71	254	371	0	130	22356	6659	0.328
312.2	19445.8	43968	1.54	27	205	0	21	684	212	1513	36050	790	12	90	361	23062	193	46	139	10	87	575	322	4170	0	743	103	0	29	5	30	304	472	0	39	22056	6802	0.327
312.4	19450.6	44342	1.42	31	193	0	56	640	149	1369	34949	759	34	42	304	25449	151	64	110	0	47	537	297	4046	0	671	36	30	0	91	77	54	422	0	0	21968	6862	0.329
312.6	19455.4	44441	1.45	64	207	0	17	662	211	1461	35222	761	23	39	309	25066	209	38	133	38	125	579	341	3996	0	634	40	10	0	100	101	52	359	0	63	21682	6876	0.333
312.8	19460.2	43383	1.3	50	191	0	12	676	218	1333	35265	820	67	77	331	21538	218	79	70	0	129	520	349	3973	52	754	5	37	0	63	13	76	445	0	54	22007	6939	0.329
313	19465	43818	1.57	52	206	0	11	775	228	1427	35276	756	43	88	298	23257	186	70	119	0	78	610	288	3870	0	696	55	28	30	72	112	186	354	11	117	21742	6758	0.328
313.2	19469.8	44147	1.37	25	174	0	0	733	206	1304	34045	828	29	57	316	25251	160	73	109	0	93	575	307	4051	15	779	20	26	18	66	5	93	487	0	89	21921	6837	0.328
313.4	19474.6	44810	1.43	14	178	0	0	757	139	1418	35253	796	62	36	335	24534	174	37	136	0	132	525	218	4265	0	693	36	0	0	38	125	0	347	0	49	21778	6782	0.330
313.6	19479.4	44919	1.38	27	184	0	38	762	211	1327	36152	755	19	31	320	24578	155	21	84	0	61	567	296	4174	0	738	80	8	0	13	105	271	440	0	0	22301	6858	0.328
313.8	19484.2	45040	1.44	34	120	0	20	740	174	1316	34884	718	19	47	282	26706	160	36	121	0	74	531	248	4088	16	693	46	7	0	6	149	124	419	25	55	21923	6862	0.330
314	19489	44538	1.4	0	155	0	46	750	175	1325	34727	765	24	50	309	26163	190	14	114	0	77	644	276	4139	18	652	40	9	63	31	102	211	444	0	0	21657	6569	0.328
314.2	19493.8	43944	1.5	15	177	0	8	680	188	1409	35938	788	46	59	323	23517	193	92	134	6	73	607	272	4170	0	663	0	33	0	24	33	87	310	0	72	21919	6868	0.326
314.4	19498.6	44222	1.67	18	174	0	9	736	207	1418	37182	767	21	47	321	22386	103	71	141	0	161	573	317	4206	0	664	54	0	0	49	170	216	340	0	109	21773	6802	0.331
314.6	19503.4	44223	1.45	23	204	0	13	742	207	1371	36188	728	55	20	362	24058	151	84	131	11	73	592	354	4146	0	626	41	7	0	70	110	172	414	27	135	22156	6838	0.326
314.8	19508.2	43625	1.54	30	163	0	18	829	209	1322	35607	760	42	71	323	24259	162	79	157	23	145	654	292	4180	20	561	61	21	0	80	164	209	427	0	106	21615	6666	0.322
315	19513	43424	1.4	45	183	0	38	841	201	1390	36055	821	39	37	313	21481	142	122	104	0	106	578	268	4289	0	728	0	0	0	53	159	181	355	32	111	21926	6819	0.325
315.2	19517.8	43713	1.43	21	184	0	13	674	185	1442	36737	802	13	46	307	20913	160	25	92	0	0	706	214	4665	27	799	26	0	7	38	77	155	416	0	58	22286	6709	0.325
315.4	19522.6	43909	1.41	31	167	0	10	793	184	1357	36325	748	59	40	316	20252	155	49	123	0	41	529	227	4651	93	652	72	15	0	123	19	117	315	0	10	22196	6839	0.328
315.6	19527.4	43874	1.37	33	175	0	18	685	187	1393	37621	757	15	86	395	20444	173	43	160	0	49	510	202	4378	0	654	88	0	0	7	0	124	432	6	0	22033	6886	0.328
315.8	19532.2	44195	1.46	52	220	0	0	728	196	1486	36416	738	16	58	412	22916	164	46	159	0	102	459	305	4294	0	655	98	0	50	0	98	201	426	0	54	22313	6965	0.325
316	19537	44885	1.24	24	156	0	17	771	196	1351	32885	797	59	90	391	27363	191	26	135	46	98	587	280	4006	0	639	43	6	4	81	152	40	412	7	173	22346	6843	0.326
316.2	19541.6	44141	1.3	39	185	0	11	876	222	1261	31383	772	44	15	385	30511	107	0	71	0	91	543	303	3276	0	608	0	21	0	0	89	230	489	16	59	21375	6460	0.325
316.4	19546.2	45641	1.61	12	131	0	42	768	210	1215	28938	671	74	54	256	38979	118	44	85	0	70	560	251	3248	0	644	70	0	0	53	164	302	553	0	111	20689	6299	0.330
316.6	19550.8	44307	1.38	15	183	0	10	835	172	1314	32270	759	52	46	323	25649	155	61	68	0	79	599	256	3691	0	646	30	16	0	10	33	186	443	0	80	22608	6685	0.327
316.8	19555.4	43399	1.48	37	186	0	6	683	201	1395	34595	812	25	32	354	23759	169	0	95	0	57	552	273	4084	0	707	41	10	12	89	104	104	378	0	28	22029	6816	0.321
317	19560	43573	1.3	41	186	0	20	720	208	1362	36086	810	46	91	308	21409	175	39	48	0	51	611	315	4581	0	730	46	0	30	0	42	177	365	0	24	21744	6866	0.325
317.2	19564.6	43221	1.32	30	180	0	21	706	193	1443	35175	737	63	29	320	21543	143	42	76	0	0	591	301	4209	0	777	48	18	0	0	8	0	330	0	40	22004	6959	0.320
317.4	19569.2	43168	1.38	38	144	0	13	798	185	1329	33785	765	28	40	297	21729	188	66	28	0	125	532	303	4226	0	675	40	10	0	74	38	126	412	0	0	22340	6962	0.322
317.6	19573.8	44088	1.33	47	162	0	24	846	190	1283	34522	743	21	39	306	23482	144	46	60	0	183	694	307	4153	13	578	53	0	5	49	115	148	431	14	242	22354	6957	0.324
317.8	19578.4	44829	1.36	27	170	0	17	822	164	1313	32315	792	27	35	311	27303	169	13	71	0	114	560	356	3739	23	743	16	19	33	0	67	160	486	0	83	22683	6782	0.326
318	19583	44230	1.39	29	186	0	27	831	203	1289	32612	682	45	24	329	26589	227	39	100	0	97	556	263	3840	0	596	81	10	40	42	126	207	444	10	74	22399	6731	0.320
318.2	19587.6	43748	1.6	32	160	0	36	793	210	1344	34168	709	39	70	324	24086	152	87	121	0	97	591	288	4106	29	719	55	12	0	34	79	22	359	0	95	22091	6934	0.322
318.4	19592.2	43468	1.27	53	154	0	0	812	206	1458	34174	799	44	71	327	23846	173	68	86	5	0	702	264	4028	37	690	34	19	10	41	66	141	438	0	16	21646	6832	0.322
318.6	19596.8	43386	1.44	30	188	0	21	775	190	1440	35273	687	33	71	310	22291	149	70	117	0	28	494	296	4248	0	619	132	0	15	0	69	177	408	46	134	22151	6609	0.323
318.8	19601.4	43404	1.5	14	178	0	19	770	168	1409	35572	769	68	86	309	21821	165	179	119	0	66	604	243	4229	24	730	52	0	0	15	37	231	332	0	142	22122	6667	0.321
319	19606	43417	1.37	46	171	0	31	745	238	1343	34795	721	26	64	342	23105	172	89	142	0	146	569	266	4111	0	692	23	10	51	44	196	132	439	0	145	22452	6925	0.318
319.2	19610.6	43406	1.51	22	218	0	13	763	228	1403	35027	740	41	42	361	21317	178	55	153	0	65	578	182	4052	0	777	79	0	0	53	77	187	382	0	0	22022	6988	0.322
319.4	19615.2	43529	1.37	26	200	0	0	816	168	1455	34875	840	45	42	406	22699	156	67	141	35	136	597	262	4003	0	607	0	21	0	80	84	125	423	0	112	22430	6854	0.320
319.6	19619.8	43462	1.53	53	198	0	55	837	216	1310	33300	840	66	50	380	22433	197	66	77	0	117	653	253	3994	25	628	36	47	39	83	0	68	419	0	62	22582	7134	0.320
319.8	19624.4	43321	1.38	47	188	0	17	761	165	1389	33952	828	50	39	365	22136	141	48	94	0	137	593	231	4114	0	846	12	5	0	56	52	206	385	7	10	22090	6973	0.317
320	19629	43884	1.44	22	193	0	34	805	193	1403	34894	755	79	65	338	23432	185	95	126	0	79	599	312	4209	0	713	19	16	35	33	105	172	457	21	34	22400	6867	0.320
320.2	19633.6	43661	1.35	30	155	0	24	809	172	1394	35958	775	31	62	323	22487	165	65	115	0	17	587	238	4230	0	686	57	0	0	30	87	15	351	0	43	22165	7033	0.317
320.4	19638.2	43621	1.42	16	189	0	52	825	172	1384	35358	850	55	89	331	21739	164	105	80	0	97	634	237	4023	0	714	47	0	0	105	47	107	418	0	186	22278	6828	0.320
320.6	19642.8	43441	1.6	20	183	0	0	767	176	1378	35599	746	25	63	320	21182	187	109	76	0	102	559	281	4164	0	642	84	14	0	10	86	138	371	0	32	22575	6939	0.319
320.8	19647.4	43720	1.38	18	181	0	7	863	185	1371	36525	818	24	66	368	21548	172	90	127	0	91	656	308	4412	92	671	66	10	0	120	134	102	390	0	25	22260	6728	0.317
321	19652	43673	1.48	0	174	0	15	867	231	1387	35945	769	25	55	383	21498	151	0	85	0	45	537	241	4125	35	771	59	0	19	87	36	202	398	0	0	22422	6952	0.317
321.2	19656.4	43394	1.34	29	160	0	5	805	183	1321	35352	782	19	88	374	20498	207	74	100	0	77	626	267	4345	0	691	37	12	0	59	89	0	434	24	65	22204	7023	0.319
321.4	19660.8	43550	1.46	12	147	0	0	919	210	1333	36458	764	32	47	350	19852	189	117	143	0	81	617	254	4398	0	604	19	5	0	28	81	123	411	0	0	22254	6925	0.324
321.6	19665.2	43609	1.62	12	205	0	26	837	225	1436	36748	698	37	38	352	20521	161	46	53	0	11	600	297	4335	0	697	64	20	0	75	81	119	394	9	95	21991	6877	0.324
321.8	19669.6	43734	1.46	31	165	0	52	926	197	1335	34743	751	49	75	348	23379	166	56	102	0	69	613	274	4130	0	703	77	0	22	42	60	105	393	0	60	22444	7090	0.319
322	19674	44140	1.46	33	190	0	23	936	213	1380	32849	776	47	31	372	23505	161	0	69	0	52	645	201	3932	98	689	58	5	23	85	5	305	432	0	45	22820	6893	0.321
322.2	19678.6	45293	1.35	30	204	0	79	954	210	1234	33245	708	38	23	292	29050	199	47	109	31	125	633	250	3883	0	599	61	0	0	36	130	234	491	0	139	22577	6986	0.322
322.4	19683.2	44277	1.55	35	173	0	34	903	177	1367	34835	784	0	5	325	25572	199	25	127	0	12	613	347	4238	23	714	42	19	0	7	119	137	491	0	127	22065	6879	0.320
322.6	19687.8	43845	1.3	59	201	0	8	949	153	1368	37240	836	62	18	307	22198	132	15	42	0	16	633	241	4275	41	703	0	29	39	68	55	147	391	0	130	22150	6854	0.323
322.8	19692.4	43781	1.26	32	167	0	23	902	194	1356	36813	808	23	45	344	21015	148	80	105	0	0	592	262	4532	19	762	37	5	0	22	115	124	375	0	85	22097	6892	0.323
323	19697	42866	1.54	21	173	0	17	807	178	1324	34541	656	60	28	350	20131	210	104	209	11	134	601	141	4324	0	669	0	37	0	92	120	353	318	0	91	22334	6864	0.318
323.2	19701.4	43744	1.4	32	196	0	6	840	209	1397	38014	787	27	24	308	20678	210	68	118	0	95	617	180	4468	27	682	41	18	0	75	75	137	442	22	0	22564	6856	0.316
323.4	19705.8	44096	1.66	28	173	0	30	838	217	1484	38305	854	66	89	319	21472	163	82	131	0	147	669	218	4574	0	576	22	10	0	55	129	121	386	0	0	22041	6805	0.321
323.6	19710.2	43711	1.61	23	169	0	62	818	189	1418	36728	721	33	66	328	22181	154	88	92	28	169	615	284	4434	82	782	71	0	0	42	100	0	402	0	18	22119	6938	0.318
323.8	19714.6	44579	1.33	30	202	0	19	842	165	1346	37221	744	41	47	299	24145	172	16	22	0	79	602	248	4345	26	722	49	5	0	19	22	316	387	0	75	22467	6717	0.319
324	19719	44413	1.44	27	186	0	0	840	168	1397	37366	780	35	68	327	21718	182	86	101	0	56	619	298	4334	0	657	53	16	6	28	71	131	331	0	92	22824	6939	0.320
324.2	19723.4	43912	1.42	33	197	0	0	837	212	1383	34149	825	30	63	380	22343	193	12	72	0	106	546	357	4222	0	679	41	4	25	73	118	27	289	0	73	23085	6892	0.317
324.4	19727.8	43113	1.43	39	186	0	11	845	215	1276	32324	765	29	53	324	21436	216	112	149	26	80	584	246	3878	0	817	52	6	0	120	162	98	397	0	62	22968	6922	0.319
324.6	19732.2	43262	1.53	37	200	0	23	872	198	1364	35418	754	50	76	331	21933	151	94	112	0	60	559	219	4020	0	723	34	0	0	32	59	52	383	0	76	22622	6738	0.317
324.8	19736.6	43899	1.35	37	203	0	31	806	160	1349	37865	743	19	48	252	22481	227	34	72	0	117	628	268	4052	0	650	55	0	0	62	57	118	401	0	17	22269	6918	0.322
325	19741	43690	1.44	44	176	0	16	805	205	1372	37932	751	26	25	309	21791	206	33	129	0	53	573	246	3987	20	867	48	0	0	26	106	49	351	0	57	22457	6848	0.320
325.2	19745.4	43678	1.44	18	218	0	40	909	188	1483	36466	770	10	39	280	22376	157	57	86	0	13	549	242	3977	9	716	63	13	0	41	55	158	367	0	107	22647	6928	0.320
325.4	19749.8	44511	1.45	32	217	0	0	954	201	1326	32600	729	42	95	308	24572	152	61	25	0	88	589	232	3683	0	586	0	25	0	6	38	112	420	8	102	23145	7113	0.327
325.6	19754.2	43789	1.52	9	199	0	20	821	208	1347	31104	711	34	85	317	24287	178	27	191	0	103	670	268	3591	14	586	35	17	0	67	142	130	386	19	88	23022	6761	0.324
325.8	19758.6	43507	1.35	53	167	0	25	826	168	1313	30382	706	14	21	306	24274	148	87	58	34	26	665	181	3570	0	672	63	0	0	35	42	193	383	0	95	22909	6896	0.325
326	19763	43226	1.57	44	205	0	17	899	195	1359	31260	739	76	40	319	24526	172	27	58	0	128	678	353	3584	34	703	26	28	30	46	175	190	397	0	48	22847	6762	0.322
326.2	19767.6	43095	1.45	56	166	0	17	783	196	1378	31913	765	44	71	334	23995	138	0	68	0	75	513	303	3612	0	795	65	15	0	10	100	197	408	0	63	22170	6614	0.323
326.4	19772.2	43445	1.35	9	196	0	9	735	171	1353	32737	792	40	61	294	23244	121	12	32	0	48	582	355	3625	29	631	65	0	0	24	41	162	386	7	20	22680	6843	0.327
326.6	19776.8	44067	1.33	25	225	0	29	761	225	1351	31082	789	99	84	333	25144	185	76	115	0	75	637	211	3536	41	723	52	0	0	51	168	66	537	0	75	22982	6655	0.326
326.8	19781.4	44280	1.22	53	173	0	9	845	194	1294	28957	804	14	41	290	27348	189	89	37	0	70	510	250	3375	0	741	23	31	0	98	177	62	334	0	44	22674	6736	0.328
327	19786	44946	1.56	44	162	0	0	860	186	1374	28496	779	69	75	313	30744	137	23	0	0	97	615	208	3161	0	509	32	5	0	86	83	246	505	0	33	22695	6631	0.326
327.2	19790.4	43922	1.3	28	200	0	30	848	180	1351	28850	728	26	78	322	27954	181	47	62	0	61	577	355	3441	13	620	60	0	12	42	88	205	555	0	28	22649	6540	0.325
327.4	19794.8	43307	1.52	32	229	0	23	824	186	1359	31255	736	32	68	321	25950	167	91	64	0	140	634	319	3613	0	704	74	0	0	0	117	164	496	21	33	22295	6778	0.322
327.6	19799.2	42666	1.37	28	229	0	8	837	215	1460	33942	721	7	44	326	21860	130	56	88	0	46	632	324	3804	0	769	43	11	0	56	20	175	365	0	45	21990	6905	0.323
327.8	19803.6	42231	1.58	16	194	0	22	711	190	1294	32603	770	31	36	311	21316	96	83	72	0	22	645	257	3793	38	670	38	31	0	52	61	7	376	10	0	21980	6569	0.324
328	19808	41796	1.31	25	206	0	31	823	177	1385	31941	742	31	79	279	21506	113	52	104	0	6	596	191	3678	0	732	65	12	0	40	44	150	395	0	27	21221	6475	0.328
328.2	19812.4	41258	1.38	21	182	0	34	756	193	1355	31852	703	21	45	278	20462	149	50	128	0	157	641	273	3880	64	666	56	16	0	46	84	160	429	0	88	21144	6661	0.325
328.4	19816.8	41695	1.56	41	193	0	32	811	180	1443	33301	776	52	74	268	21592	140	68	43	0	58	553	239	4029	15	639	77	7	0	0	0	160	500	0	0	20996	6472	0.325
328.6	19821.2	41703	1.43	43	250	0	39	857	225	1434	34741	743	72	71	293	21399	141	21	64	0	103	516	305	3936	0	599	76	0	0	64	69	171	445	0	150	20821	6567	0.322
328.8	19825.6	42847	1.76	29	309	0	27	894	246	1608	35993	777	0	80	346	21841	178	0	89	0	87	587	272	4063	21	658	105	18	0	6	0	171	399	0	62	21521	6539	0.326
329	19830	42633	1.45	24	283	0	14	897	206	1483	35338	819	28	59	322	21673	157	32	138	0	41	499	295	3971	0	664	52	7	45	44	83	96	427	0	70	21610	6887	0.322
329.2	19834.4	41664	1.52	0	195	0	20	794	196	1386	32809	811	21	48	291	21577	134	72	128	0	76	584	300	3940	0	610	61	0	0	0	86	17	305	0	67	20953	6929	0.321
329.4	19838.8	42564	1.58	12	212	0	44	806	218	1422	32981	820	38	76	292	23069	157	87	91	0	124	639	272	3741	0	621	25	21	0	118	82	211	450	0	75	21487	6696	0.324
329.6	19843.2	42504	1.43	14	216	0	10	776	209	1399	32904	786	79	64	307	22634	155	57	128	0	10	570	365	3878	0	596	41	0	0	45	141	83	335	0	87	21973	6829	0.318
329.8	19847.6	42501	1.67	12	208	0	40	772	184	1467	32278	784	62	73	388	22026	196	31	53	0	91	761	292	3994	0	717	61	13	15	43	106	141	374	0	27	21935	7039	0.319
330	19852	42647	1.39	49	188	0	32	745	241	1366	32726	834	38	59	315	22196	152	60	111	5	118	618	234	3962	0	729	44	12	0	71	40	208	477	25	95	21683	6828	0.319
330.2	19856.4	43006	1.56	61	218	0	22	835	241	1367	31295	814	11	35	319	23081	119	20	64	0	71	602	400	3895	0	667	44	27	0	40	47	56	298	0	0	21807	6649	0.326
330.4	19860.8	42582	1.55	28	230	0	14	919	191	1366	32264	763	25	36	278	23965	105	18	36	0	32	581	280	3764	0	667	48	19	0	53	130	208	416	0	55	21816	6692	0.319
330.6	19865.2	43053	1.2	38	210	0	39	765	174	1450	32483	809	43	53	286	24538	178	53	129	0	79	517	246	3811	0	743	7	38	12	0	90	65	447	35	143	21669	6815	0.318
330.8	19869.6	42315	1.45	0	188	0	0	756	209	1460	32596	837	45	71	327	21666	113	24	110	18	0	539	228	3983	0	640	54	0	8	31	8	7	335	12	60	21728	6588	0.317
331	19874	42628	1.41	34	182	0	13	805	189	1337	33279	787	50	39	333	21404	125	44	94	0	65	617	290	4052	28	654	61	15	0	35	34	80	322	0	98	22161	6834	0.321
331.2	19878.4	42728	1.4	34	228	0	14	830	157	1444	32925	824	70	69	333	22337	161	53	123	37	90	613	257	3929	0	673	47	0	10	66	147	78	422	7	211	21988	6569	0.320
331.4	19882.8	42971	1.48	23	171	0	10	692	178	1383	33158	742	40	31	299	22182	161	53	71	0	42	604	262	4001	12	753	30	27	0	119	43	149	305	0	22	22212	6977	0.320
331.6	19887.2	43361	1.69	39	172	0	46	772	206	1392	33406	794	45	78	311	24010	163	55	106	0	157	696	307	4063	0	665	72	0	0	85	151	100	405	0	27	22500	6701	0.320
331.8	19891.6	42981	1.48	43	190	0	29	709	225	1450	32943	819	64	65	301	23393	161	86	110	7	126	627	231	3999	18	637	71	0	0	42	177	73	369	0	0	22014	6701	0.321
332	19896	42628	1.48	31	197	0	23	748	165	1438	32129	765	19	49	280	22713	145	13	93	0	98	580	388	4111	52	770	62	0	0	109	51	184	369	0	45	22331	6882	0.318
332.2	19900.4	42513	1.41	37	183	0	29	750	214	1399	31770	731	45	66	298	23289	153	11	65	0	48	651	269	3945	0	687	74	0	30	84	159	159	467	11	0	22030	6629	0.319
332.4	19904.8	42551	1.43	17	174	0	23	743	200	1323	32407	775	56	53	280	22814	189	55	112	0	37	524	255	4050	0	661	47	31	0	43	24	191	425	0	76	21480	6548	0.319
332.6	19909.2	42448	1.33	14	192	0	11	710	169	1352	33422	777	52	33	306	22169	119	36	122	0	209	587	234	4142	0	628	71	0	0	18	77	179	423	0	28	22059	6732	0.318
332.8	19913.6	42394	1.44	12	170	0	9	735	201	1345	32787	798	33	62	296	22544	208	15	102	0	46	575	254	3932	7	808	69	17	0	75	76	144	391	0	19	22486	6885	0.318
333	19918	42811	1.49	26	160	0	33	723	184	1390	31473	866	24	73	294	22576	139	63	55	0	33	555	237	4036	0	676	70	25	0	80	120	0	474	21	0	22339	6614	0.319
333.2	19922.2	42963	1.5	55	163	0	5	937	164	1369	30580	852	73	39	306	22797	161	6	74	0	0	613	280	3935	0	648	7	33	38	13	10	149	373	0	48	22417	6819	0.316
333.4	19926.4	43486	1.49	49	174	0	32	855	173	1374	28916	704	54	69	281	25132	186	26	137	0	102	552	377	3725	35	745	71	0	0	39	45	78	465	12	0	23190	6807	0.318
333.6	19930.6	43179	1.46	26	151	0	29	768	199	1421	28760	743	42	65	302	26521	160	0	102	0	133	595	307	3462	0	639	84	0	0	52	121	0	429	0	107	22319	6765	0.315
333.8	19934.8	43417	1.46	0	141	0	8	797	210	1249	28035	739	45	47	268	27060	136	0	120	0	0	527	286	3474	0	622	41	22	0	44	110	119	420	0	110	22816	6914	0.316
334	19939	44558	1.33	23	188	0	51	753	190	1416	30820	795	50	34	279	31574	156	43	126	0	106	648	330	3475	60	781	41	0	0	0	158	145	389	0	13	21651	6469	0.321
334.2	19943.4	43864	1.41	38	173	0	0	748	141	1437	30625	774	51	70	320	27664	211	90	128	0	70	668	274	3586	0	655	51	12	17	17	60	168	493	21	28	22556	7005	0.318
334.4	19947.8	44235	1.68	14	194	0	24	922	211	1379	29444	776	63	57	250	27681	120	50	35	28	128	632	309	3455	0	683	38	21	0	42	167	135	421	24	107	22867	6833	0.321
334.6	19952.2	44005	1.56	48	181	0	31	779	198	1309	28956	807	44	68	322	27187	174	66	58	0	94	560	319	3530	16	707	34	26	0	83	60	170	456	15	57	22616	6893	0.320
334.8	19956.6	44001	1.36	47	179	0	0	744	211	1417	30990	810	40	20	267	27297	174	30	154	24	84	589	324	3742	0	695	48	5	0	41	182	54	449	0	119	22515	6900	0.317
335	19961	43536	1.39	0	180	0	0	764	200	1481	32190	824	18	22	349	24444	191	70	112	0	63	619	251	4035	0	613	99	0	27	0	118	84	436	0	156	22425	6947	0.312
335.2	19965.4	42604	1.37	38	177	0	34	828	230	1445	31058	771	56	25	313	22926	184	0	119	0	127	531	254	3804	0	655	44	22	49	31	98	123	381	0	30	22182	6762	0.316
335.4	19969.8	42453	1.36	46	191	0	22	703	216	1516	31710	811	24	37	276	23080	123	85	102	0	70	546	227	3482	0	694	26	20	0	5	43	169	372	0	59	22078	6638	0.317
335.6	19974.2	42858	1.47	49	214	0	27	697	202	1509	31891	828	43	53	324	24476	154	0	111	0	39	588	333	3669	0	705	20	26	104	24	67	195	494	0	21	22143	7142	0.318
335.8	19978.6	43069	1.22	41	232	0	0	840	174	1441	32762	771	51	22	314	25403	149	80	149	0	63	556	282	3786	0	543	85	0	0	114	37	103	470	0	71	21922	6894	0.316
336	19983	43205	1.42	51	181	0	0	751	198	1540	31880	867	17	82	353	25364	141	44	85	0	5	587	333	3750	56	781	0	45	0	36	110	119	365	8	45	22237	6852	0.318
336.2	19987.2	43501	1.32	52	176	0	12	809	228	1502	32129	884	0	104	360	24884	138	51	54	0	72	480	227	3755	0	704	47	0	0	81	47	219	432	0	49	22336	6696	0.319
336.4	19991.4	43519	1.77	33	196	0	27	767	218	1526	33025	955	26	50	358	24550	180	61	107	4	27	517	281	3720	0	670	37	39	0	108	71	0	339	0	13	22268	6853	0.315
336.6	19995.6	43190	1.51	55	194	0	0	746	262	1585	34389	886	13	50	342	23941	144	60	90	15	115	570	342	3788	0	759	71	24	0	47	56	136	389	0	172	22218	6590	0.314
336.8	19999.8	42985	1.35	29	226	0	18	680	201	1582	34984	893	49	55	317	23362	153	73	143	10	12	508	227	3812	35	616	9	40	0	103	55	97	475	0	63	21583	6694	0.320
337	20004	43395	1.42	68	256	0	39	658	179	1624	36368	875	10	58	286	22941	169	109	154	0	37	616	318	4033	0	772	53	5	0	90	124	66	362	0	142	21615	6689	0.319
337.2	20008.2	43347	1.37	27	192	0	13	675	213	1629	35866	866	36	62	318	22965	196	57	112	0	138	566	420	4103	49	748	75	7	0	118	86	68	433	7	122	22156	7106	0.316
337.4	20012.4	43625	1.45	22	220	0	11	699	208	1624	35848	868	0	110	338	23707	204	71	168	67	94	596	289	3978	17	726	41	7	0	87	114	142	403	0	89	21795	6728	0.318
337.6	20016.6	44420	1.41	41	223	0	10	750	201	1526	33726	848	22	64	280	26382	183	40	75	0	125	628	350	3905	74	693	40	14	0	14	40	105	436	27	118	22858	7055	0.315
337.8	20020.8	44984	1.38	24	165	0	14	732	182	1481	33670	866	41	66	300	27998	158	0	87	22	82	541	303	3576	0	682	54	9	0	52	128	222	448	0	122	22464	6738	0.320
338	20025	43690	1.37	53	192	0	5	788	195	1393	32208	736	64	38	296	24909	197	86	100	12	68	606	301	3936	59	677	73	7	0	55	56	131	449	0	0	22813	6833	0.318
338.2	20029.4	42447	1.48	28	157	0	15	801	186	1266	29744	748	61	36	289	22700	119	64	116	0	110	545	303	3966	14	694	27	23	0	57	111	170	387	0	59	22679	6679	0.312
338.4	20033.8	44160	1.36	47	215	0	14	884	198	1519	34921	828	24	71	298	24591	116	101	100	0	54	636	318	4182	0	667	83	0	0	81	104	188	410	5	38	22273	6864	0.314
338.6	20038.2	44340	1.5	24	259	0	39	836	222	1675	36644	881	36	33	333	25762	191	113	105	67	118	577	314	4201	68	818	28	36	0	106	124	104	443	9	144	22388	6946	0.314
338.8	20042.6	44006	1.35	46	237	0	24	728	218	1544	36449	898	20	64	360	24208	228	65	148	0	107	574	346	4222	0	707	18	19	0	74	104	25	478	0	144	22247	6986	0.313
339	20047	44010	1.43	35	190	0	17	726	193	1577	36780	901	46	36	305	24230	181	0	121	0	0	568	299	4163	48	683	60	38	20	0	83	108	410	16	121	22368	7031	0.313
339.2	20051.2	44137	1.46	22	220	0	29	730	237	1571	36596	894	41	10	296	24225	147	76	80	0	95	577	316	4213	0	659	45	13	0	47	113	33	355	0	35	22184	7086	0.312
339.4	20055.4	44378	1.47	0	179	0	0	797	179	1487	33100	814	53	47	352	26335	186	13	99	0	11	654	382	3858	0	713	31	11	0	99	135	206	475	0	108	22666	6860	0.315
339.6	20059.6	45024	1.56	11	195	0	38	853	201	1517	32821	794	52	51	271	30384	100	48	67	30	180	575	405	3821	0	619	54	6	0	93	159	107	434	0	107	22609	6916	0.317
339.8	20063.8	45461	1.51	28	165	0	82	858	197	1358	33270	804	54	31	238	32239	142	83	67	0	58	524	154	3846	0	678	75	0	0	49	67	109	434	0	9	21817	6783	0.321
340	20068	43912	1.44	16	202	0	8	834	186	1533	35679	799	24	74	333	24693	190	128	167	40	80	579	296	4103	0	662	55	0	0	93	98	121	384	0	139	22095	6805	0.315
340.2	20072.2	43565	1.64	28	167	0	5	874	211	1408	34189	688	17	41	299	24007	139	0	81	0	54	599	249	4124	0	636	113	0	24	38	30	174	368	0	90	22059	7018	0.315
340.4	20076.4	43520	1.48	42	191	0	24	845	182	1415	34749	823	39	16	341	23104	210	127	124	0	121	578	375	4311	45	680	53	34	0	69	103	102	387	12	82	22378	7015	0.313
340.6	20080.6	43581	1.43	21	154	0	18	899	193	1430	33677	767	71	85	355	23620	184	83	59	0	145	620	280	4041	0	726	70	0	0	36	71	221	428	0	47	21937	6879	0.317
340.8	20084.8	43879	1.43	28	168	0	13	821	215	1561	35099	890	24	70	338	23668	156	72	111	0	69	545	193	4038	57	633	32	10	13	46	74	201	378	0	75	22415	7071	0.316
341	20089	44021	1.42	42	237	0	41	819	202	1420	34456	825	42	56	366	24012	157	105	45	90	82	498	253	4138	97	678	75	4	0	31	100	201	470	0	143	22432	6890	0.315
341.2	20093.4	43576	1.78	30	214	0	11	920	203	1592	36526	933	28	91	394	23575	135	42	69	0	105	584	173	4106	16	724	75	11	74	74	153	111	428	0	169	22042	6987	0.315
341.4	20097.8	43613	1.4	24	184	0	27	826	202	1448	37454	767	6	61	331	21758	191	79	88	0	93	617	308	4356	0	623	39	13	4	64	42	179	460	0	70	22139	7149	0.317
341.6	20102.2	43585	1.47	40	223	0	21	786	186	1470	36742	838	18	42	284	23688	178	85	117	9	90	683	297	4318	0	662	47	21	0	17	43	254	392	0	6	21753	6988	0.313
341.8	20106.6	44113	1.53	20	199	0	0	821	220	1477	36325	897	39	23	358	24033	204	74	76	6	87	659	324	4474	0	690	28	35	0	126	172	63	392	0	57	22423	6949	0.314
342	20111	44022	1.41	19	212	0	11	855	176	1622	38568	823	19	92	274	22661	186	158	132	0	0	549	298	4372	0	709	91	0	0	90	76	98	460	0	0	22135	7114	0.313
342.2	20115.2	44252	1.51	37	225	0	14	843	185	1483	39200	826	44	34	309	22809	207	64	149	0	77	601	368	4408	0	653	78	0	0	11	92	129	300	0	95	22128	7136	0.314
342.4	20119.4	44850	1.5	25	191	0	47	798	159	1511	35980	910	60	39	329	26767	215	48	112	0	37	581	332	3899	0	671	0	36	0	120	146	216	471	19	101	22367	6869	0.317
342.6	20123.6	45175	1.52	40	212	0	43	783	203	1570	37234	878	61	71	345	25053	160	53	174	0	170	551	399	4115	0	704	48	22	0	15	158	91	479	0	148	22800	6705	0.317
342.8	20127.8	46194	1.46	37	209	0	114	839	184	1400	32642	840	92	75	326	33331	171	33	89	0	35	572	265	3808	0	661	45	13	0	0	67	238	485	18	17	22724	7034	0.321
343	20132	46953	1.45	28	179	0	35	865	173	1397	31694	782	49	106	327	27786	172	45	128	0	182	621	325	3847	0	687	100	0	0	0	8	221	433	0	33	24081	7259	0.321
343.2	20136.4	49889	1.47	33	215	0	38	954	180	1502	31668	896	6	53	356	26994	232	77	52	0	100	832	330	4672	51	875	0	51	70	39	143	102	424	0	164	27392	7400	0.326
343.4	20140.8
343.6	20145.2
343.8	20149.6
344	20154
344.2	20158.2
344.4	20162.4
344.6	20166.6
344.8	20170.8
345	20175
345.2	20179.2
345.4	20183.4
345.6	20187.6
345.8	20191.8
346	20196
346.2	20200.2
346.4	20204.4
346.6	20208.6
346.8	20212.8
347	20217
347.2	20221.4
347.4	20225.8
347.6	20230.2
347.8	20234.6
348	20239
348.2	20243.2
348.4	20247.4
348.6	20251.6
348.8	20255.8
349	20260
349.2	20264.2
349.4	20268.4
349.6	20272.6
349.8	20276.8
350	20281
350.2	20285.2
350.4	20289.4
350.6	20293.6
350.8	20297.8
351	20302
351.2	20306.4
351.4	20310.8
351.6	20315.2
351.8	20319.6
352	20324
352.2	20328.2
352.4	20332.4
352.6	20336.6
352.8	20340.8
353	20345
353.2	20349.2
353.4	20353.4
353.6	20357.6
353.8	20361.8
354	20366
354.2	20370.4
354.4	20374.8
354.6	20379.2
354.8	20383.6
355	20388
355.2	20392
355.4	20396
355.6	20400
355.8	20404
356	20408
356.2	20412.2
356.4	20416.4
356.6	20420.6
356.8	20424.8
357	20429
357.2	20433.2
357.4	20437.4
357.6	20441.6
357.8	20445.8
358	20450
358.2	20454.4
358.4	20458.8
358.6	20463.2
358.8	20467.6
359	20472
359.2	20476.2
359.4	20480.4
359.6	20484.6
359.8	20488.8
360	20493
360.2	20497.2
360.4	20501.4
360.6	20505.6
360.8	20509.8
361	20514
361.2	20518.2
361.4	20522.4
361.6	20526.6
361.8	20530.8
362	20535
362.2	20539.2
362.4	20543.4
362.6	20547.6
362.8	20551.8
363	20556
363.2	20560.2
363.4	20564.4
363.6	20568.6
363.8	20572.8
364	20577
364.2	20581.2
364.4	20585.4
364.6	20589.6
364.8	20593.8
365	20598
365.2	20602.2
365.4	20606.4
365.6	20610.6
365.8	20614.8
366	20619
366.2	20623.2
366.4	20627.4
366.6	20631.6
366.8	20635.8
367	20640
367.2	20644.2
367.4	20648.4
367.6	20652.6
367.8	20656.8
368	20661
368.2	20665.2
368.4	20669.4
368.6	20673.6
368.8	20677.8
369	20682
369.2	20686.4
369.4	20690.8
369.6	20695.2
369.8	20699.6
370	20704
370.2	20708.2
370.4	20712.4
370.6	20716.6
370.8	20720.8
371	20725
371.2	20729
371.4	20733
371.6	20737
371.8	20741
372	20745
372.2	20749.2	41703	1.4	29	158	0	52	822	199	1459	31481	762	66	44	337	24168	187	29	19	0	76	535	335	3894	119	684	41	18	37	43	61	227	413	0	51	21769	6514	0.309
372.4	20753.4	41894	1.32	39	140	0	21	687	202	1221	30273	803	44	90	290	23363	179	33	91	0	49	603	268	3772	0	637	64	0	54	61	166	0	376	0	0	22336	6793	0.311
372.6	20757.6	43077	1.7	51	185	0	47	754	198	1356	30672	733	71	74	308	24370	156	43	166	38	146	670	262	3862	27	669	61	26	0	55	157	148	398	12	129	23333	6956	0.313
372.8	20761.8	44041	1.31	62	206	0	13	691	215	1384	33518	751	35	75	262	27429	146	59	93	0	34	656	208	3885	0	556	84	0	0	65	96	115	382	0	145	22241	6880	0.313
373	20766	44799	1.51	34	182	0	20	829	188	1380	33520	784	35	89	278	31146	166	76	74	0	5	602	253	3774	29	698	73	13	0	47	0	288	485	0	5	21989	6815	0.316
373.2	20770.2	45193	1.43	33	209	0	0	794	199	1581	33851	891	77	72	364	26294	169	55	134	0	43	655	247	4060	71	658	33	8	70	30	99	217	500	0	0	23273	7173	0.315
373.4	20774.4	44630	1.49	31	184	0	0	761	190	1470	34812	792	52	93	321	25506	224	49	78	11	72	569	372	3941	0	652	76	0	0	89	111	115	480	7	142	23380	7199	0.310
373.6	20778.6	44051	1.56	11	154	0	14	719	205	1473	33820	822	74	35	336	24648	185	93	98	32	95	665	381	3954	0	669	40	26	0	57	91	139	344	0	97	23144	6952	0.309
373.8	20782.8	44331	1.6	32	215	0	0	699	165	1506	35426	835	76	33	319	24430	152	99	106	0	70	607	261	4118	0	717	46	0	21	55	54	59	377	0	42	23173	7099	0.312
374	20787	43999	1.43	39	212	0	20	774	167	1548	35307	797	75	66	334	24014	206	84	113	0	55	568	265	4324	23	626	67	36	0	5	35	105	514	0	8	23147	6915	0.307
374.2	20791.4	44668	1.47	35	228	0	37	694	175	1413	34739	866	19	74	310	25713	119	44	88	0	66	681	248	4210	9	674	31	4	29	95	180	207	364	0	254	22733	6956	0.312
374.4	20795.8	44624	1.5	0	191	0	25	702	182	1440	35333	779	24	61	297	23777	149	74	128	26	137	703	295	4244	0	769	95	0	0	42	104	231	357	16	194	23352	7130	0.311
374.6	20800.2	45086	1.39	23	153	0	0	732	160	1580	36981	759	52	28	307	23409	223	100	121	30	111	730	279	4395	0	738	56	0	0	59	62	138	399	0	127	23487	7466	0.311
374.8	20804.6	45357	1.49	23	187	0	13	747	170	1556	37309	858	25	59	339	24230	203	116	107	0	129	640	381	4509	0	701	68	12	0	34	54	134	400	33	52	23373	7174	0.311
375	20809	45989	1.57	46	219	0	5	756	206	1533	36951	822	72	78	327	26643	170	98	79	34	26	825	269	4270	0	691	80	0	0	32	143	61	435	0	190	23927	7366	0.313
375.2	20813.2	45957	1.36	57	230	0	48	791	198	1537	37190	894	65	43	361	25420	180	42	101	0	98	689	351	4367	0	688	59	32	40	110	145	222	437	0	90	23433	6892	0.315
375.4	20817.4	46110	1.44	0	193	0	0	775	179	1606	37103	881	30	60	341	24629	208	57	23	0	127	612	390	4638	49	722	75	11	0	49	135	138	420	0	67	24103	7371	0.313
375.6	20821.6	46257	1.31	33	197	0	0	839	183	1542	37809	914	49	143	386	25833	172	134	132	20	67	664	335	4494	0	705	66	0	0	100	120	153	453	19	39	23620	7131	0.312
375.8	20825.8	46278	1.5	32	196	0	8	823	142	1585	38720	975	68	73	330	25824	195	73	117	0	131	624	288	4444	0	727	17	42	40	15	61	97	457	0	95	23527	7224	0.310
376	20830	46918	1.5	45	223	0	12	867	145	1571	36288	836	47	84	383	24804	185	89	104	0	63	603	288	4337	0	753	84	0	0	37	163	63	424	13	137	24251	7326	0.316
376.2	20834.4	46837	1.38	21	221	0	17	835	192	1667	37211	928	17	10	345	25719	179	88	107	0	87	624	315	4323	0	694	35	44	0	12	66	112	454	0	15	23930	7142	0.321
376.4	20838.8	46473	1.54	39	207	0	31	777	186	1601	37131	846	65	48	323	26807	193	56	128	47	36	608	313	4265	29	706	43	25	0	95	138	91	458	0	93	23571	7447	0.316
376.6	20843.2	48001	1.46	14	250	0	57	781	181	1696	37781	990	23	55	353	27966	191	59	122	72	123	645	357	4511	30	656	56	6	0	104	137	210	467	4	104	24435	7423	0.321
376.8	20847.6	46332	1.5	59	228	0	0	798	153	1628	35899	906	0	66	405	25505	215	0	50	0	44	727	305	4244	0	644	72	0	4	54	43	189	468	0	94	24437	7442	0.312
377	20852	45626	1.41	39	195	0	0	778	158	1486	35030	788	53	37	348	24426	185	90	80	38	144	634	361	4377	67	655	82	0	0	61	52	74	458	0	109	23859	7304	0.311
377.2	20856.2	45870	1.5	18	229	0	28	744	137	1596	37221	895	9	74	380	25118	180	9	131	0	130	659	250	4586	5	799	81	15	0	64	83	363	400	0	81	24370	7507	0.306
377.4	20860.4	45798	1.3	22	227	0	0	737	114	1591	37122	871	52	53	372	24189	247	64	145	0	134	664	401	4678	0	870	13	10	0	64	163	142	414	0	168	24284	7585	0.313
377.6	20864.6	45410	1.36	41	203	0	0	748	139	1449	37489	775	52	61	295	23253	169	22	112	42	104	773	302	4482	6	796	55	0	0	10	135	135	348	0	26	24141	7434	0.310
377.8	20868.8	45364	1.52	41	219	0	11	731	184	1610	36704	896	54	78	382	24256	152	47	114	6	50	707	265	4511	17	735	43	11	0	68	77	236	409	0	49	24019	7292	0.308
378	20873	45274	1.42	16	185	0	0	754	154	1571	36234	876	0	81	347	23722	164	76	84	0	54	647	300	4506	0	807	77	0	0	82	63	55	413	0	33	23674	7269	0.309
378.2	20877.2	45905	1.5	25	196	0	24	807	131	1441	35298	819	48	51	328	26446	210	80	123	0	34	642	280	4645	61	756	78	0	0	0	0	294	420	0	40	24166	7341	0.313
378.4	20881.4	45582	1.39	18	172	0	24	743	133	1502	36339	817	49	44	351	24374	210	85	60	0	134	637	265	4551	9	658	87	0	0	18	19	224	453	0	82	23903	7241	0.312
378.6	20885.6	45033	1.55	45	187	0	0	706	157	1410	35325	865	18	71	351	24242	175	52	85	0	42	634	266	4390	0	737	60	0	22	16	0	12	340	0	113	23823	7237	0.309
378.8	20889.8	44943	1.45	16	223	0	4	701	187	1560	36500	849	42	61	324	23602	223	83	125	0	62	621	364	4394	11	669	17	20	0	50	117	39	420	0	22	23351	7234	0.309
379	20894	44821	1.36	56	191	0	8	674	157	1466	35367	824	42	87	371	23567	244	12	125	0	57	645	309	4362	0	570	78	17	106	51	168	112	489	0	226	23316	7283	0.312
379.2	20898.4	44657	1.68	22	184	0	13	735	167	1361	34833	820	23	84	370	23307	138	10	85	0	103	596	277	4311	25	700	54	0	0	14	135	47	335	0	238	23785	7199	0.312
379.4	20902.8	44461	1.43	33	175	0	17	702	164	1521	33849	771	41	43	340	24733	102	56	71	0	84	605	285	4172	54	759	60	19	0	16	56	177	404	6	107	23709	7120	0.310
379.6	20907.2	44205	1.42	16	185	0	0	734	94	1401	33865	871	34	37	388	22747	141	74	101	0	53	682	282	4303	17	809	0	38	0	51	47	263	439	0	87	23786	7142	0.312
379.8	20911.6	44228	1.47	28	169	0	11	710	153	1402	33345	857	25	80	353	21978	154	66	121	0	111	768	371	4464	4	783	31	0	0	0	36	140	376	0	0	23551	7434	0.314
380	20916	43826	1.4	33	199	0	0	737	143	1442	33086	811	45	38	392	22151	169	24	124	0	105	714	339	4310	44	706	29	29	0	14	32	246	423	0	11	23538	7429	0.308
380.2	20920.2	43145	1.38	0	155	0	0	735	145	1327	31587	721	32	47	275	21014	115	34	80	0	89	658	342	4213	0	695	69	0	0	23	165	103	367	17	31	23715	7255	0.310
380.4	20924.4	43583	1.47	11	167	0	0	687	128	1495	33624	805	53	32	315	22203	176	83	125	22	23	616	189	4137	0	616	56	0	0	124	87	186	476	0	124	22847	7040	0.310
380.6	20928.6	44047	1.48	44	179	0	5	660	118	1449	33740	740	36	25	343	22935	163	79	109	0	110	609	286	4303	0	639	65	0	0	48	78	66	453	8	107	23791	7268	0.310
380.8	20932.8	44373	1.34	39	212	0	5	686	125	1535	33840	850	18	86	331	24216	214	12	95	0	82	654	356	4137	0	742	24	14	19	22	31	231	444	0	77	23483	7253	0.309
381	20937	43936	1.41	38	174	0	0	667	105	1466	33674	890	26	57	315	22728	173	100	127	43	116	698	351	4256	28	741	43	0	0	27	181	99	361	0	113	23824	7242	0.307
381.2	20941.2	43966	1.68	42	204	0	12	646	158	1573	34389	792	16	53	279	23213	197	66	89	0	128	675	385	4201	0	745	72	7	0	51	81	297	281	0	29	23477	7278	0.310
381.4	20945.4	44677	1.56	50	230	0	14	780	161	1532	34916	888	42	76	312	24223	165	94	109	0	119	657	362	4280	0	661	65	0	0	0	99	200	422	0	42	23660	7222	0.312
381.6	20949.6	45454	1.38	60	202	0	11	765	134	1526	35921	879	30	101	328	25228	217	48	143	0	131	666	334	4147	0	805	52	15	0	68	102	51	366	0	67	23809	7381	0.309
381.8	20953.8	45626	1.59	42	215	0	0	752	137	1610	36088	939	23	62	332	25007	109	20	79	0	54	616	356	4563	97	815	26	17	0	0	47	174	421	0	48	24078	7566	0.308
382	20958	46196	1.38	33	238	0	0	703	143	1567	36913	872	40	37	365	25215	172	78	141	0	81	668	408	4522	34	786	37	17	9	0	199	158	371	47	181	24737	7596	0.312
382.2	20962.2	46253	1.5	38	232	0	40	705	168	1589	36745	939	8	52	337	26220	164	90	90	0	56	726	247	4262	0	745	36	33	0	24	127	66	434	5	211	24379	7460	0.311
382.4	20966.4	45487	1.51	27	211	0	24	756	169	1614	36544	961	0	100	338	23470	204	109	78	0	73	717	331	4731	0	814	52	8	0	30	0	189	422	0	118	24239	7406	0.309
382.6	20970.6	45505	1.51	22	239	0	20	734	160	1595	36752	910	62	63	308	22817	161	68	128	0	78	788	337	4726	9	859	58	21	0	57	80	208	362	0	88	24554	7407	0.309
382.8	20974.8	45049	1.45	10	198	0	0	725	97	1476	37059	870	14	54	329	22183	175	86	148	57	92	671	346	4727	0	847	32	49	0	70	97	181	467	0	75	24217	7331	0.307
383	20979	45137	1.43	26	197	0	0	744	160	1489	37263	819	41	49	299	22233	186	55	108	0	126	685	365	4820	14	744	38	8	14	72	176	166	424	0	123	24163	7312	0.309
383.2	20983.4	45344	1.45	30	179	0	4	717	161	1484	37742	883	0	78	273	22267	227	93	77	19	66	679	364	4707	43	771	62	0	0	70	135	161	477	0	89	24224	7344	0.308
383.4	20987.8	44403	1.47	0	194	0	29	758	157	1406	33721	824	0	57	293	23075	169	55	150	5	71	722	318	4644	0	700	25	32	0	97	0	184	444	0	44	23899	7400	0.306
383.6	20992.2	44115	1.43	34	215	0	19	748	174	1401	34179	777	34	60	350	21552	155	58	120	0	68	610	250	4909	37	660	58	0	0	0	86	183	354	0	103	23696	7123	0.308
383.8	20996.6	44199	1.41	41	195	0	45	743	165	1383	34007	787	41	73	327	22131	168	66	77	0	183	594	284	4467	11	831	37	0	14	36	62	242	417	0	151	24214	7553	0.307
384	21001	44825	1.35	62	176	0	28	659	149	1391	34869	860	0	76	337	25997	153	0	0	0	112	621	366	4273	62	726	37	0	0	0	131	243	433	0	0	23439	7626	0.309
384.2	21005.2	45104	1.49	38	159	0	36	711	182	1463	32108	792	27	77	314	27488	229	86	109	0	119	692	372	3992	0	696	55	12	6	101	128	50	437	0	96	23987	7332	0.310
384.4	21009.4	44995	1.5	37	194	0	0	765	170	1478	34311	764	54	73	327	25444	179	110	130	61	120	706	360	4216	0	707	80	12	0	18	138	114	420	0	57	24086	7407	0.309
384.6	21013.6	44772	1.36	40	218	0	0	736	113	1435	33446	821	0	70	301	24584	181	64	136	0	134	523	298	4266	0	558	37	0	0	126	158	0	406	0	197	23737	7312	0.310
384.8	21017.8	44431	1.44	19	191	0	0	744	134	1393	31706	782	72	70	310	25769	105	39	30	0	81	595	369	3954	13	734	58	0	0	0	93	242	348	0	33	23492	7307	0.309
385	21022	45069	1.51	22	193	0	40	662	153	1386	31729	698	77	43	277	31482	185	61	57	0	90	484	329	3752	0	680	79	6	21	60	101	133	506	0	101	22837	7127	0.314
385.2	21026.4	44438	1.52	35	233	0	32	683	148	1408	31862	789	59	54	321	28331	190	103	107	0	105	587	310	3927	26	692	33	17	0	127	92	282	496	0	49	23205	6964	0.312
385.4	21030.8	43390	1.38	27	217	0	11	708	152	1558	33254	807	65	54	332	24223	169	29	93	0	94	529	279	4027	0	721	16	32	11	16	147	72	377	0	34	22790	6962	0.308
385.6	21035.2	43305	1.56	43	217	0	14	617	168	1443	35111	851	15	55	349	22067	172	111	98	0	102	638	247	4403	101	761	16	41	0	100	53	289	296	0	130	22876	6989	0.309
385.8	21039.6	43211	1.35	30	162	0	0	672	165	1447	34109	811	17	32	311	21485	156	87	79	0	78	598	383	4305	0	752	53	23	41	19	127	279	415	0	166	23348	7100	0.310
386	21044	43554	1.46	42	201	0	6	687	131	1407	34598	824	57	28	305	23568	183	34	96	18	38	557	334	4297	37	625	0	15	0	39	103	96	428	0	96	23006	7123	0.312
386.2	21048.4	43374	1.47	26	186	0	29	596	145	1385	34216	754	24	91	282	23650	160	33	71	0	138	627	319	4305	0	749	56	0	24	95	119	228	404	0	112	23042	7092	0.308
386.4	21052.8	43474	1.49	37	194	0	0	678	157	1444	34819	784	18	52	329	21372	144	65	132	0	120	559	347	4461	0	618	80	7	0	30	67	200	366	0	114	22918	7340	0.313
386.6	21057.2	43570	1.43	48	207	0	39	660	158	1449	34906	851	0	63	324	22273	170	12	57	0	109	655	285	4425	66	607	77	0	45	35	58	157	390	0	121	22982	6977	0.313
386.8	21061.6	44333	1.35	49	231	0	6	650	154	1425	35213	825	36	82	350	23097	187	129	170	0	27	626	335	4395	45	707	27	16	0	4	30	154	495	0	146	23389	7417	0.309
387	21066	45363	1.42	47	218	0	19	725	202	1499	36027	874	64	53	371	23740	188	57	109	0	36	652	294	4227	59	701	30	0	0	70	156	255	455	0	54	24265	7388	0.313
387.2	21070.2	45084	1.33	47	157	0	29	731	135	1457	35919	929	44	43	306	23103	183	70	56	0	115	655	306	4451	0	631	0	25	0	27	113	198	411	0	71	23850	7312	0.312
387.4	21074.4	44923	1.59	25	185	0	15	870	172	1324	32338	773	24	61	337	23489	199	106	16	0	28	657	321	4369	45	677	48	31	0	86	137	41	476	0	16	24540	7165	0.310
387.6	21078.6	43977	1.43	19	130	0	24	811	208	1262	30212	730	14	37	322	23140	162	23	14	22	126	622	417	4101	8	705	42	0	15	59	127	106	461	0	31	23876	7170	0.312
387.8	21082.8	43960	1.46	38	159	0	0	758	164	1356	28949	767	71	61	300	22963	154	39	54	0	128	652	278	3806	0	691	64	8	0	134	95	157	474	0	114	25012	7064	0.310
388	21087	43115	1.72	41	143	0	20	794	165	1244	28875	671	28	85	326	22849	164	15	103	0	66	651	291	3601	0	712	96	11	51	19	160	55	397	0	145	23802	6951	0.312
388.2	21091.4	42246	1.64	31	150	0	22	650	190	1278	29713	798	46	61	290	22264	150	60	12	0	93	594	297	3856	0	686	42	0	0	89	90	115	388	6	112	23190	7063	0.313
388.4	21095.8	42460	1.35	18	163	0	0	669	204	1345	31848	832	56	20	296	21912	126	68	112	0	72	528	319	3996	8	627	15	9	0	42	110	167	381	6	163	22618	6827	0.313
388.6	21100.2	43236	1.4	41	146	0	71	680	180	1340	30488	746	48	41	283	29269	144	87	107	0	47	639	328	3564	0	679	13	27	0	70	230	97	458	0	180	21876	6704	0.313
388.8	21104.6	42244	1.44	20	118	0	8	784	185	1248	31162	782	32	42	307	22043	165	72	120	13	58	526	319	3821	63	718	39	13	0	64	67	219	413	25	0	22841	6964	0.312
389	21109	42081	1.53	8	157	0	0	671	165	1362	31667	785	6	35	302	21792	147	0	89	0	103	636	227	3765	57	671	70	0	57	20	90	139	347	0	75	22439	7085	0.310
389.2	21113.2	42280	1.44	21	161	0	8	649	145	1276	31424	821	33	31	317	22572	202	113	111	0	156	545	237	3843	44	633	16	13	0	131	140	127	409	0	0	22482	6871	0.313
389.4	21117.4	43079	1.33	27	169	0	83	669	168	1212	28972	709	20	52	315	28729	134	71	58	0	76	460	251	3625	0	686	92	0	0	75	71	191	514	0	103	21616	6793	0.318
389.6	21121.6	43358	1.49	22	178	0	89	716	184	1150	25663	727	28	61	277	34321	124	13	20	0	97	558	294	3275	0	500	33	7	0	0	78	140	537	0	39	21601	6766	0.315
389.8	21125.8	41977	1.39	19	122	0	0	817	169	1206	24762	740	34	54	315	25658	179	40	89	0	0	625	282	3346	41	655	33	0	0	11	102	269	471	0	93	22839	6723	0.313
390	21130	43098	1.31	44	140	0	16	773	199	1131	26335	652	52	43	321	26771	128	52	98	0	31	582	354	3416	0	804	60	0	17	0	76	112	374	0	84	23195	6959	0.316
390.2	21134.4	43081	1.5	39	173	0	19	810	144	1224	27488	733	72	53	333	26508	152	67	64	0	120	545	252	3503	0	741	43	0	7	25	17	237	486	0	132	22906	6530	0.314
390.4	21138.8	42703	1.31	20	185	14	20	708	161	1331	28876	827	42	22	354	25590	170	32	65	0	117	608	236	3519	24	605	53	25	0	133	154	167	419	16	18	22760	6719	0.315
390.6	21143.2	41526	1.42	31	175	0	7	722	183	1357	29791	696	27	73	293	22261	150	43	78	0	0	580	315	3666	31	653	93	0	0	0	32	166	397	11	76	22654	6808	0.310
390.8	21147.6	41494	1.48	23	184	0	7	735	177	1374	31298	795	51	70	295	21040	132	64	99	0	167	624	218	3950	8	617	58	0	0	47	44	137	364	0	59	21944	6592	0.311
391	21152	41577	1.32	41	144	0	0	725	173	1361	31251	744	37	49	346	21699	175	92	107	0	45	557	232	3887	0	644	28	30	0	37	85	0	416	15	47	22046	6981	0.311
391.2	21156.4	41538	1.37	0	185	0	0	642	187	1224	29914	772	32	27	312	24683	190	50	107	0	130	531	242	3697	0	667	34	17	0	55	17	188	367	0	72	21475	6700	0.310
391.4	21160.8	41544	1.44	8	157	0	17	650	201	1322	32108	781	46	23	273	25660	173	0	100	0	25	551	356	3880	0	628	68	11	34	107	118	287	465	0	89	21023	6500	0.303
391.6	21165.2	41282	1.39	24	204	0	0	593	136	1462	34172	723	38	62	298	21187	166	104	111	0	58	650	309	3982	22	661	72	11	0	113	0	295	347	0	115	21240	6629	0.312
391.8	21169.6	41988	1.38	32	256	0	16	600	192	1445	35629	807	66	23	283	20460	160	85	152	6	63	587	328	4211	0	700	28	21	0	110	26	166	334	0	64	21635	6788	0.312
392	21174	42285	1.64	29	183	0	0	616	179	1499	36241	921	34	33	317	21187	199	65	150	0	66	633	322	4246	35	707	23	24	0	84	96	234	377	0	44	21975	6860	0.310
392.2	21178.4	42932	1.49	7	196	0	0	642	149	1488	35636	821	42	78	306	22232	186	30	118	0	146	599	256	4197	31	721	47	0	0	38	105	39	424	0	87	22370	7025	0.309
392.4	21182.8	41702	1.43	36	203	0	30	759	189	1304	33058	775	55	21	296	21181	138	0	150	0	99	670	328	4192	10	814	43	27	97	40	75	53	411	0	9	21993	6775	0.306
392.6	21187.2	41565	1.49	25	163	0	0	678	143	1373	33003	831	16	56	321	20507	143	0	165	0	32	685	379	4174	52	720	26	27	0	41	78	136	393	0	0	21908	6428	0.314
392.8	21191.6	41545	1.52	37	198	0	27	617	188	1420	33310	812	42	64	234	21602	123	50	94	20	80	559	254	4078	43	641	87	0	0	59	204	144	395	0	135	21832	6466	0.314
393	21196	41950	1.55	12	167	0	0	599	184	1408	34181	863	44	56	357	21902	169	28	123	0	93	534	374	4132	10	809	19	29	23	56	133	157	368	0	169	21781	6923	0.310
393.2	21200.4	42167	1.75	30	181	0	7	772	150	1465	31898	834	18	81	298	22898	144	87	132	0	112	648	221	3879	0	630	88	0	0	61	93	109	382	0	116	21548	6722	0.313
393.4	21204.8	42583	1.43	20	157	0	19	667	197	1321	29004	764	0	39	303	25342	160	40	74	0	73	510	278	3422	29	579	34	19	0	0	48	94	371	0	31	22401	6944	0.314
393.6	21209.2	42287	1.59	37	178	0	0	632	204	1341	28482	752	62	57	305	25998	158	22	65	41	53	563	288	3295	0	647	40	17	0	34	88	112	473	0	62	22043	6670	0.315
393.8	21213.6	43472	1.55	25	190	0	0	685	188	1359	29128	796	28	69	330	27348	131	47	0	0	64	646	260	3510	0	529	51	5	0	53	114	9	446	0	82	22408	6842	0.315
394	21218	43576	1.3	52	182	0	31	711	153	1291	27352	800	0	45	307	28102	166	0	87	0	93	616	285	3230	70	687	26	33	41	35	147	131	428	0	67	22557	6748	0.320
394.2	21222.2	43123	1.76	34	161	0	0	759	211	1329	26931	745	57	71	353	28128	122	15	43	0	81	619	278	3241	0	649	48	8	0	61	76	128	451	0	0	22624	6697	0.314
394.4	21226.4	42803	1.16	46	183	0	0	753	207	1248	28487	775	34	32	323	25584	129	42	51	16	104	660	304	3541	26	598	60	10	0	69	82	146	361	0	79	22487	6704	0.316
394.6	21230.6	42827	1.55	7	167	0	40	777	197	1275	27759	840	54	48	288	27749	123	35	145	0	92	631	286	3396	0	789	9	29	0	47	107	105	441	0	115	21873	6809	0.314
394.8	21234.8	42468	1.4	9	157	0	6	733	187	1307	28520	733	47	58	304	27349	138	71	78	0	33	584	308	3529	23	741	70	0	0	42	95	246	429	0	98	21703	6628	0.315
395	21239	43494	1.45	35	179	0	0	692	173	1306	30594	778	50	65	257	31791	171	70	87	0	66	557	269	3627	0	756	44	0	6	43	88	88	521	21	164	21149	6700	0.314
395.2	21243.4	42088	1.42	30	190	0	0	597	190	1373	32270	715	79	9	278	23847	133	4	114	0	111	532	270	3826	0	629	76	0	0	52	30	237	444	0	0	21058	6560	0.316
395.4	21247.8	42715	1.51	42	208	0	4	698	158	1488	34310	909	42	51	326	23604	193	85	72	0	89	493	388	3926	12	674	35	0	0	11	82	137	395	0	78	21497	6807	0.311
395.6	21252.2	42161	1.46	46	222	0	33	625	193	1491	32078	850	23	104	277	23491	141	88	102	6	42	541	353	3866	83	677	61	14	0	10	81	217	407	0	33	21865	6780	0.314
395.8	21256.6	41217	1.39	18	182	0	29	661	171	1300	31796	847	8	56	316	22738	128	33	32	0	82	602	325	3899	0	668	0	37	0	51	0	52	397	0	91	21590	6502	0.307
396	21261	41554	1.5	19	188	0	0	694	187	1372	30665	743	70	58	280	22287	159	49	113	25	61	564	336	3797	0	765	51	0	0	57	86	177	393	7	60	21889	6925	0.311
396.2	21265.4	42202	1.62	11	152	0	0	656	199	1424	31476	869	0	73	261	24124	131	54	92	0	75	544	274	3516	0	665	48	16	0	48	120	60	374	0	102	21703	6892	0.312
396.4	21269.8	42158	1.42	44	180	0	0	626	188	1422	31844	796	38	71	318	23951	154	45	117	0	78	574	505	3635	0	740	95	0	20	41	125	206	438	0	34	22077	6935	0.310
396.6	21274.2	42417	1.44	15	170	0	15	615	175	1456	30393	860	13	54	343	25103	153	35	110	46	127	574	241	3517	0	638	43	32	9	85	13	96	401	7	120	22191	6661	0.310
396.8	21278.6	42563	1.53	20	206	0	0	664	223	1499	31855	841	30	66	318	24561	121	39	95	0	45	550	420	3657	0	645	40	21	0	48	88	140	335	33	32	22340	6899	0.309
397	21283	42776	1.58	45	196	0	17	632	215	1444	30873	802	65	45	360	25041	154	53	91	0	19	510	235	3683	0	677	50	0	29	40	76	0	421	0	10	22282	6863	0.312
397.2	21287.4	42652	1.36	68	206	0	14	706	201	1484	31654	843	79	49	296	25348	151	72	109	0	17	556	318	3692	47	706	5	45	0	0	75	175	356	0	68	22102	6732	0.307
397.4	21291.8	43586	1.46	31	217	0	17	666	204	1525	32922	905	71	57	368	25605	186	97	113	0	106	672	274	3909	0	731	25	23	0	132	52	170	391	0	63	22714	7107	0.310
397.6	21296.2	43707	1.55	49	263	0	0	686	173	1524	32039	910	31	45	308	26388	150	21	92	39	37	564	309	3691	39	803	29	40	0	26	130	224	443	29	37	22529	6884	0.311
397.8	21300.6	43359	1.5	33	203	0	9	721	169	1399	30978	931	27	75	337	25620	152	19	111	0	88	586	318	3825	52	651	74	10	88	21	35	176	387	0	111	22868	6736	0.308
398	21305	43596	1.45	23	187	0	20	710	184	1506	30626	898	30	23	393	25924	137	6	137	0	216	640	421	3743	0	606	30	47	9	50	157	140	314	0	112	22581	6712	0.311
398.2	21309.2	44748	1.33	32	240	0	13	752	191	1440	29995	824	45	77	367	28086	198	0	86	0	30	631	320	3683	0	604	75	0	0	50	152	132	501	4	120	22960	7014	0.314
398.4	21313.4	44895	1.48	30	209	0	18	692	197	1559	29457	962	29	58	370	29124	135	32	128	0	89	531	347	3341	0	760	30	33	0	85	118	85	313	0	35	23451	6794	0.311
398.6	21317.6	44265	1.38	50	242	9	8	765	192	1546	30125	935	68	8	340	27993	175	5	121	0	85	616	318	3376	0	659	21	23	79	62	113	185	419	0	0	23015	6942	0.310
398.8	21321.8	44238	1.59	17	160	0	46	784	172	1293	27270	804	0	60	317	26687	181	76	94	0	100	669	285	3518	0	757	90	0	0	0	87	96	391	0	0	23997	7093	0.309
399	21326	43685	1.41	58	178	0	24	797	203	1368	29313	788	88	44	307	25952	164	27	113	9	10	560	338	3538	34	743	89	0	4	37	107	37	438	0	67	23419	6978	0.307
[truncated: 19,287 more rows]

## Sheet: G. Ruber isotopes
Purcell et al., 2025
Oxygen and carbon isotopes for G. Ruber foraminifera shells.
FARLAB Sample ID	Run	Comments	Top depth (cm)	Bottom depth (cm)	Mean depth (cm)	d 18O/16O mean value of replicates	STDEV d 18O/16O	d 13C/12C mean value of replicates	STDEV d 13C/12C
2020-031-AL_145	MS20-06		0	1	0.5	-0.606565	0.06	-0.1075	0.02
2021-30-002			8	9	8.5	0.76055	0.06	0.615	0.02
2020-031-AL_146			24	25	24.5	-0.41481	0.06	-0.19	0.02
2021-30-003			32	33	32.5	-1.1601	0.06	0.519	0.02
2021-30-004			40	41	40.5	-1.3659	0.06	0.892	0.02
2020-031-AL_147			48	49	48.5	-1.15705	0.06	0.2395	0.02
2021-30-006			56	57	56.5	-0.17371	0.06	0.459	0.02
2021-30-007			64	65	64.5	-0.68549	0.06	0.511	0.02
2020-031-AL_148			72	73	72.5	-1.20075	0.06	0.2065	0.02
2021-30-009			80	81	80.5	-1.2505	0.06	-0.009	0.02
2020-031-AL_149			96	97	96.5	-0.88694	0.06	0.423	0.02
2021-30-011			104	105	104.5	-0.38143	0.06	0.564	0.02
2021-30-012			112	113	112.5	-0.39347	0.06	0.471	0.02
2020-031-AL_150			120	121	120.5	-0.707425	0.06	0.117	0.02
2021-30-014			128	129	128.5	-0.48981	0.06	-0.177	0.02
2021-30-015			136	137	136.5	-0.76577	0.06	0.166	0.02
2020-031-AL_151			144	145	144.5	-0.236	0.06	0.5215	0.02
2021-30-017			152	153	152.5	0.065125	0.06	0.568	0.02
2021-30-018		too small	160	161	160.5	-0.79788	0.06	0.133	0.02
2020-031-AL_152			168	169	168.5	-0.29514	0.06	0.1265	0.02
2021-30-020			176	177	176.5	-0.67847	0.06	0.678	0.02
2021-30-021			184	185	184.5	-0.055295	0.06	0.901	0.02
2020-031-AL_153			192	193	192.5	0.298205	0.06	0.263	0.02
2021-30-023			208	209	208.5	0.09523	0.06	0.378	0.02
2020-031-AL_154			216	217	216.5	0.310698	0.06	0.1645	0.02
2021-30-025			224	225	224.5	0.78765	0.06	0.65	0.02
2021-30-026			232	233	232.5	0.21866	0.06	0.486	0.02
2020-031-AL_155			240	241	240.5	0.043447	0.06	0.281	0.02
2021-30-028			248	249	248.5	0.28991	0.06	0.542	0.02
2021-30-029			256	257	256.5	0.32704	0.06	0.49	0.02
2020-031-AL_156			264	265	264.5	0.226645	0.06	0.537	0.02
2021-30-031			272	273	272.5	0.2588	0.06	0.363	0.02
2021-30-032			280	281	280.5	-0.08841	0.06	0.233	0.02
2020-031-AL_157			288	289	288.5	0.059462	0.06	0.1575	0.02
2021-30-034			296	297	296.5	-0.039239	0.06	0.319	0.02
2021-30-035			304	305	304.5	0.29794	0.06	0.311	0.02
2020-031-AL_158			312	313	312.5	-0.150915	0.06	0.487	0.02
2021-30-037			320	321	320.5	0.067132	0.06	0.157	0.02
2021-30-038			328	329	328.5	0.40832	0.06	0.453	0.02
2020-031-AL_159			336	337	336.5	0.227445	0.06	0.5045	0.02
not enough (empty)			360	361	360.5	0	0.06	0	0.02
2021-30-040			376	377	376.5	0.24877	0.06	0.306	0.02
2020-031-AL_161			384	385	384.5	0.157221	0.06	0.5385	0.02
2021-30-042			392	393	392.5	0.45649	0.06	0.59	0.02
2021-30-043			400	401	400.5	0.71439	0.06	0.182	0.02
2020-031-AL_162			408	409	408.5	0.199295	0.06	0.3735	0.02
2021-30-045			416	417	416.5	-0.0021091	0.06	0.334	0.02
2021-30-046			424	425	424.5	0.19658	0.06	0.592	0.02
2020-031-AL_163			432	433	432.5	0.31575	0.06	0.393	0.02
2021-30-048			440	441	440.5	0.064122	0.06	0.472	0.02
2021-30-049			448	449	448.5	0.074157	0.06	0.498	0.02
2020-031-AL_164			456	457	456.5	-0.11942	0.06	0.3675	0.02
2021-30-051			464	465	464.5	-0.034221	0.06	0.631	0.02
2021-30-052			472	473	472.5	-0.024186	0.06	0.385	0.02
2020-031-AL_165			480	481	480.5	-0.00589	0.06	0.3265	0.02
2021-30-054			488	489	488.5	-0.056298	0.06	0.225	0.02
2021-30-055			496	497	496.5	0.14842	0.06	0.435	0.02
2020-031-AL_166			504	505	504.5	-0.089846	0.06	0.3375	0.02
2021-30-057			512	513	512.5	0.033013	0.06	0.179	0.02
2021-30-058			520	521	520.5	0.26984	0.06	0.383	0.02
2020-031-AL_167			528	529	528.5	-0.114988	0.06	0.5375	0.02
2021-30-060			536	537	536.5	-0.21184	0.06	0.396	0.02
2021-30-061			544	545	544.5	0.58895	0.06	0.405	0.02
2020-031-AL_168			552	553	552.5	-0.004725	0.06	0.394	0.02
2021-30-063			560	561	560.5	-0.30216	0.06	0.09	0.02
2021-30-064			568	569	568.5	-0.049274	0.06	0.298	0.02
2020-031-AL_169			576	577	576.5	-0.0258275	0.06	0.421	0.02
2021-30-066			584	585	584.5	-0.1145	0.06	0.363	0.02
2021-30-067			592	593	592.5	-0.053288	0.06	0.206	0.02
2020-031-AL_170			600	601	600.5	0.29982	0.06	0.283	0.02
2021-30-069			608	609	608.5	-0.30818	0.06	0	0.02
2021-30-070			616	617	616.5	0.26482	0.06	0.381	0.02
2020-031-AL_171			624	625	624.5	-0.109352	0.06	0.286	0.02
2021-30-072			632	633	632.5	-0.093428	0.06	0.232	0.02
2021-30-073			640	641	640.5	0.01495	0.06	0.193	0.02
2020-031-AL_172			648	649	648.5	-0.254165	0.06	0.579	0.02
2021-30-075			656	657	656.5	-0.23994	0.06	0.279	0.02
2021-30-076			664	665	664.5	-0.52293	0.06	0.52	0.02
2020-031-AL_173			672	673	672.5	0.036891	0.06	0.199	0.02
2021-30-078			680	681	680.5	-0.042249	0.06	0.365	0.02
2021-30-079			688	689	688.5	-0.086403	0.06	0.559	0.02
2020-031-AL_174			696	697	696.5	-0.19205	0.06	0.3635	0.02
2021-30-081			704	705	704.5	0.051076	0.06	0.588	0.02
2021-30-082			712	713	712.5	-0.47576	0.06	0.713	0.02
2020-031-AL_175			720	721	720.5	-0.11471	0.06	0.446	0.02
2021-30-084			728	729	728.5	-0.21385	0.06	0.816	0.02
2021-30-085			736	737	736.5	-0.1998	0.06	0.35	0.02
2020-031-AL_176			744	745	744.5	-0.285695	0.06	0.627	0.02
2021-30-087			752	753	752.5	-0.075365	0.06	0.481	0.02
2021-30-088			760	761	760.5	-0.29312	0.06	2.751	0.02
2020-031-AL_177			768	769	768.5	-0.395655	0.06	0.212	0.02
2021-30-090			776	777	776.5	-0.27707	0.06	0.402	0.02
2021-30-091			784	785	784.5	-0.23291	0.06	0.764	0.02
2020-031-AL_178	MS20-07		792	793	792.5	-0.154371	0.06	0.252	0.02
2021-30-093			800	801	800.5	-0.21585	0.06	0.64	0.02
2021-30-094			808	809	808.5	-0.33126	0.06	1.951	0.02
2020-031-AL_179			816	817	816.5	0.11634	0.06	0.2485	0.02
2021-30-096			824	825	824.5	-0.36939	0.06	0.611	0.02
2021-30-097			832	833	832.5	-0.19679	0.06	0.748	0.02
2020-031-AL_180			840	841	840.5	-0.54455	0.06	0.352	0.02
2021-30-099			848	849	848.5	-0.072354	0.06	0.47	0.02
2021-30-100			856	857	856.5	1.5041	0.06	0.529	0.02
2020-031-AL_181			864	865	864.5	-0.33994	0.06	0.2665	0.02
2021-30-102			872	873	872.5	-1.4281	0.06	0.406	0.02
2021-30-103			880	881	880.5	-0.3714	0.06	0.383	0.02
2020-031-AL_182			888	889	888.5	-0.13626	0.06	0.3315	0.02
2021-30-105			896	897	896.5	-0.75473	0.06	0.375	0.02
2021-30-106			904	905	904.5	-0.29413	0.06	0.087	0.02
2020-031-AL_183			912	913	912.5	-0.587405	0.06	0.2855	0.02
2021-30-108			920	921	920.5	-0.76608	0.06	0.158	0.02
2021-30-109			928	929	928.5	-0.32594	0.06	0.09	0.02
2020-031-AL_184			936	937	936.5	-0.635895	0.06	-0.218	0.02
2021-30-111			944	945	944.5	-0.27054	0.06	0.444	0.02
2021-30-112			952	953	952.5	-0.89098	0.06	0.264	0.02
2020-031-AL_185			960	961	960.5	-0.633345	0.06	0.3605	0.02
2021-30-114			968	969	968.5	-0.36219	0.06	0.468	0.02
2021-30-115			976	977	976.5	-0.32191	0.06	0.3	0.02
2020-031-AL_186			984	985	984.5	-0.0889	0.06	0.2775	0.02
2021-30-117			992	993	992.5	-0.41759	0.06	0.389	0.02
2021-30-118			1000	1001	1000.5	-0.16277	0.06	0.249	0.02
2020-031-AL_187			1008	1009	1008.5	-0.349725	0.06	0.2695	0.02
2021-30-120			1016	1017	1016.5	-0.46392	0.06	0.412	0.02
2021-30-121			1024	1025	1024.5	-0.036869	0.06	0.152	0.02
2020-031-AL_188			1032	1033	1032.5	-0.46167	0.06	0.3955	0.02
2021-30-123			1040	1041	1040.5	-0.73284	0.06	0.266	0.02
2021-30-124			1048	1049	1048.5	-0.20004	0.06	-0.16	0.02
2020-031-AL_189			1056	1057	1056.5	-0.56611	0.06	-0.063	0.02
2021-30-242			1064	1065	1064.5	-0.65932	0.06	0.784	0.02
2021-30-243			1072	1073	1072.5	-0.41155	0.06	0.811	0.02
2020-031-AL_190			1080	1081	1080.5	-0.62084	0.06	0.2635	0.02
2021-30-245			1088	1089	1088.5	-0.55961	0.06	0.011	0.02
2021-30-246			1096	1097	1096.5	0.011476	0.06	-0.407	0.02
2020-031-AL_191			1104	1105	1104.5	-0.27807	0.06	0.3465	0.02
2021-30-248			1112	1113	1112.5	-0.52637	0.06	-0.197	0.02
2021-30-249			1120	1121	1120.5	-0.55658	0.06	0.662	0.02
2020-031-AL_192			1128	1129	1128.5	-0.43442	0.06	-0.168	0.02
2021-30-251			1136	1137	1136.5	-0.68853	0.06	-0.202	0.02
2021-30-252			1144	1145	1144.5	-0.5173	0.06	0.079	0.02
2020-031-AL_193			1152	1153	1152.5	-0.48375	0.06	-0.221	0.02
2021-30-254			1160	1161	1160.5	-0.28162	0.06	0.171	0.02
2021-30-255			1168	1169	1168.5	-0.18896	0.06	0.129	0.02
2020-031-AL_194			1176	1177	1176.5	-0.132725	0.06	0.4145	0.02
2021-30-257			1184	1185	1184.5	-0.11241	0.06	0.017	0.02
2021-30-258			1192	1193	1192.5	-0.099316	0.06	0.418	0.02
2020-031-AL_195			1200	1201	1200.5	0.0347625	0.06	0.4685	0.02
2021-30-260			1208	1209	1208.5	-0.30277	0.06	0.61	0.02
2021-30-261			1216	1217	1216.5	-0.17486	0.06	0.204	0.02
2020-031-AL_196		sample small, marginal, but ok	1224	1225	1224.5	-0.21477	0.06	-0.139	0.02
2021-30-263			1232	1233	1232.5	-0.012697	0.06	-0.079	0.02
2021-30-264			1240	1241	1240.5	-0.59284	0.06	0.649	0.02
2020-031-AL_197	MS20-07b		1248	1249	1248.5	-0.32473	0.06	0.58	0.02
2021-30-266			1256	1257	1256.5	-0.12953	0.06	0.17	0.02
2021-30-267			1264	1265	1264.5	-0.22622	0.06	0.173	0.02
2020-031-AL_198			1272	1273	1272.5	-0.0266115	0.06	0.691	0.02
2021-30-269			1280	1281	1280.5	0.24414	0.06	0.383	0.02
2021-30-270			1288	1289	1288.5	-0.44479	0.06	0.779	0.02
not enough			1296	1297	1296.5	-0.82954	0.06	0.328	0.02
2021-30-272			1304	1305	1304.5	0.032627	0.06	-0.152	0.02
2021-30-273			1312	1313	1312.5	-0.47903	0.06	0.074	0.02
2020-031-AL_199			1320	1321	1320.5	0.67101	0.06	0.605	0.02
2021-30-275			1328	1329	1328.5	-0.63615	0.06	0.304	0.02
2021-30-276			1336	1337	1336.5	-0.10334	0.06	0.413	0.02
2020-031-AL_200			1344	1345	1344.5	-0.505395	0.06	0.3675	0.02
2021-30-278			1352	1353	1352.5	-0.13658	0.06	0.492	0.02
2021-30-279			1360	1361	1360.5	-0.31586	0.06	0.149	0.02
2020-031-AL_201			1368	1369	1368.5	0.126279	0.06	0.1515	0.02
2021-30-281			1376	1377	1376.5	-0.76508	0.06	0.308	0.02
2021-30-282			1384	1385	1384.5	-0.72579	0.06	0.381	0.02
2020-031-AL_202			1392	1393	1392.5	-0.71643	0.06	0.21	0.02
2021-30-284			1400	1401	1400.5	-0.79227	0.06	-0.215	0.02
2021-30-285			1408	1409	1408.5	-0.32896	0.06	-0.027	0.02
2020-031-AL_203			1416	1417	1416.5	0.0336	0.06	-0.016	0.02
2021-30-287			1424	1425	1424.5	-0.63313	0.06	-0.392	0.02
2021-30-288			1432	1433	1432.5	-0.78119	0.06	0.262	0.02
2020-031-AL_204			1440	1441	1440.5	-0.700205	0.06	0.5735	0.02
2021-30-290			1448	1449	1448.5	-0.99472	0.06	1.109	0.02
2021-30-291			1456	1457	1456.5	-1.4097	0.06	0.258	0.02
2020-031-AL_205			1464	1465	1464.5	-0.411565	0.06	0.238	0.02
2021-30-293			1472	1473	1472.5	-0.21514	0.06	0.578	0.02
2021-30-294			1480	1481	1480.5	-0.66536	0.06	0.842	0.02
2020-031-AL_206	MS20- 08		1488	1489	1488.5	-1.01241	0.06	0.255	0.02
2021-30-296			1496	1497	1496.5	-0.48709	0.06	0.3	0.02
2021-30-297			1504	1505	1504.5	-1.3553	0.06	0.015	0.02
2020-031-AL_207			1512	1513	1512.5	-0.219075	0.06	0.3695	0.02
2021-30-299			1520	1521	1520.5	-0.96752	0.06	0.724	0.02
2020-031-AL_208			1536	1537	1536.5	-0.71132	0.06	-0.2225	0.02
2021-30-303			1552	1553	1552.5	-0.78623	0.06	0.214	0.02
2020-031-AL_209			1560	1561	1560.5	-0.37142	0.06	0.64	0.02
2022-05-01		new results below	1568	1569	1568.5	-0.56229	0.06	0.385	0.02
2022-05-02			1576	1577	1576.5	-0.06822	0.06	0.751	0.02
2020-031-AL_210			1584	1585	1584.5	-0.384335	0.06	0.728	0.02
2022-05-04			1592	1593	1592.5	-0.011984	0.06	0.201	0.02
2022-05-05			1600	1601	1600.5	-0.50003	0.06	-0.013	0.02
2020-031-AL_211			1608	1609	1608.5	-0.266535	0.06	0.1515	0.02
2022-05-07			1616	1617	1616.5	-1.2974	0.06	0.256	0.02
2022-05-08			1624	1625	1624.5	-0.43777	0.06	0.296	0.02
2020-031-AL_212			1632	1633	1632.5	-0.683975	0.06	0.265	0.02
2022-05-10			1640	1641	1640.5	-0.65969	0.06	0.144	0.02
2022-05-11			1648	1649	1648.5	-0.62756	0.06	0.696	0.02
2020-031-AL_213			1656	1657	1656.5	-0.34321	0.06	0.5495	0.02
2022-05-13			1664	1665	1664.5	-0.40061	0.06	-0.07	0.02
2022-05-14			1672	1673	1672.5	-0.69484	0.06	0.89	0.02
2020-031-AL_214			1680	1681	1680.5	-0.590745	0.06	0.249	0.02
2022-05-16			1688	1689	1688.5	0.071364	0.06	-0.205	0.02
2022-05-17			1696	1697	1696.5	-1.0784	0.06	0.531	0.02
2020-031-AL_215			1704	1705	1704.5	-0.43922	0.06	-0.2425	0.02
2022-05-19			1712	1713	1712.5	-0.83141	0.06	0.532	0.02
2022-05-20			1720	1721	1720.5	-0.73802	0.06	0.514	0.02
2020-031-AL_216			1728	1729	1728.5	-0.528475	0.06	0.394	0.02
2022-05-22			1736	1737	1736.5	-1.213	0.06	0.045	0.02
2022-05-23			1744	1745	1744.5	-0.5181	0.06	0.377	0.02
2020-031-AL_217			1752	1753	1752.5	-0.37688	0.06	-0.1885	0.02
2022-05-25			1760	1761	1760.5	-1.1879	0.06	0.707	0.02
2022-05-26			1768	1769	1768.5	-0.58538	0.06	0.437	0.02
2020-031-AL_218			1776	1777	1776.5	-0.885755	0.06	0.1235	0.02
2022-05-28			1784	1785	1784.5	-1.1578	0.06	0.066	0.02
2022-05-29			1792	1793	1792.5	-1.4329	0.06	-0.185	0.02
2020-031-AL_219			1800	1801	1800.5	-0.66197	0.06	0.1235	0.02
2022-05-31			1808	1809	1808.5	-0.95091	0.06	0.506	0.02
2022-05-32			1816	1817	1816.5	-1.0965	0.06	0.597	0.02
2020-031-AL_220			1824	1825	1824.5	-0.466265	0.06	0.1215	0.02
2022-05-34			1832	1833	1832.5	-0.32831	0.06	-0.176	0.02
2022-05-35			1840	1841	1840.5	-1.1819	0.06	0.062	0.02
2020-031-AL_221			1848	1849	1848.5	-0.48442	0.06	-0.205	0.02
2022-05-37			1856	1857	1856.5	-0.46287	0.06	-0.138	0.02
2022-05-38			1864	1865	1864.5	-0.62957	0.06	0.18	0.02
2020-031-AL_222			1872	1873	1872.5	-0.703735	0.06	-0.161	0.02
2022-05-40			1880	1881	1880.5	-0.60948	0.06	0.32	0.02
2022-05-41			1888	1889	1888.5	-0.64363	0.06	0.442	0.02
2020-031-AL_223			1896	1897	1896.5	-0.3065	0.06	0.6845	0.02
2022-05-43			1904	1905	1904.5	-0.27006	0.06	0.14	0.02
2022-05-44			1912	1913	1912.5	-0.37952	0.06	0.197	0.02
2020-031-AL_224			1920	1921	1920.5	-0.0505295	0.06	0.201	0.02
2022-05-46			1928	1929	1928.5	-0.78723	0.06	0.585	0.02
2022-05-47			1936	1937	1936.5	-0.84547	0.06	0.184	0.02
2020-031-AL_225			1944	1945	1944.5	-0.5595	0.06	-0.017	0.02
2022-05-50			1960	1961	1960.5	-0.34839	0.06	0.965	0.02
2020-031-AL_226			1968	1969	1968.5	-0.39283	0.06	0.3555	0.02
2022-05-52			1976	1977	1976.5	-0.10337	0.06	0.033	0.02
2022-05-53			1984	1985	1984.5	0.044251	0.06	0.705	0.02
2020-031-AL_227			1992	1993	1992.5	-0.879165	0.06	0.354	0.02
2022-05-55			2000	2001	2000.5	-0.57835	0.06	0.721	0.02
2022-05-56			2008	2009	2008.5	-0.61852	0.06	0.067	0.02
2020-031-AL_228			2016	2017	2016.5	-0.81202	0.06	0.1005	0.02
2022-05-58			2024	2025	2024.5	-1.0895	0.06	-0.138	0.02
2022-05-59			2032	2033	2032.5	-0.86555	0.06	0.509	0.02
2020-031-AL_229			2040	2041	2040.5	-0.803685	0.06	0.114	0.02
2022-05-61			2048	2049	2048.5	-1.0553	0.06	0.242	0.02
2022-05-62			2056	2057	2056.5	-0.93383	0.06	0.123	0.02
2022-05-63			2064	2065	2064.5	-0.18272	0.06	0.174	0.02
2022-05-64			2072	2073	2072.5	-0.060747	0.06	0.62	0.02
2022-05-65			2080	2081	2080.5	-1.4054	0.06	0.102	0.02
2020-031-AL_231			2088	2089	2088.5	-1.1635	0.06	0.088	0.02
2022-05-67			2096	2097	2096.5	-0.9379	0.06	-0.007	0.02
2022-05-68			2104	2105	2104.5	-0.78239	0.06	0.403	0.02
2020-031-AL_232			2112	2113	2112.5	-0.783725	0.06	-0.0295	0.02
2022-05-70			2120	2121	2120.5	-0.0048452	0.06	-0.091	0.02
2022-05-71			2128	2129	2128.5	-0.61469	0.06	0.066	0.02
2020-031-AL_233			2136	2137	2136.5	0.134549	0.06	-0.1	0.02
2022-05-73			2144	2145	2144.5	0.091713	0.06	-0.11	0.02
2022-05-74			2152	2153	2152.5	-0.13088	0.06	-0.32	0.02
2020-031-AL_234			2160	2161	2160.5	0.067575	0.06	-0.1855	0.02
2022-05-76			2168	2169	2168.5	-0.38701	0.06	0.041	0.02
2022-05-77			2176	2177	2176.5	0.1466	0.06	0.012	0.02
2020-031-AL_235			2184	2185	2184.5	0.243685	0.06	-0.1275	0.02
2022-05-79			2192	2193	2192.5	-0.18373	0.06	0.122	0.02
2022-05-80			2200	2201	2200.5	-0.14917	0.06	-0.265	0.02
2020-031-AL_236			2208	2209	2208.5	0.280215	0.06	0.0365	0.02
Rerun 2022-05-82			2216	2217	2216.5	-0.0087566	0.06	0.085	0.02
2022-05-83			2224	2225	2224.5	-0.054649	0.06	0.217	0.02
2020-031-AL_237			2232	2233	2232.5	0.027008	0.06	-0.2845	0.02
2022-05-85			2240	2241	2240.5	-0.21422	0.06	0.522	0.02
2022-05-86			2248	2249	2248.5	-0.59842	0.06	-0.147	0.02
2020-031-AL_238			2256	2257	2256.5	-0.08154	0.06	-0.2765	0.02
2022-05-88			2264	2265	2264.5	-0.19491	0.06	-0.072	0.02
2022-05-89			2272	2273	2272.5	0.36004	0.06	-0.128	0.02
2020-031-AL_239			2280	2281	2280.5	1.07096	0.06	0.1605	0.02
2022-05-91			2288	2289	2288.5	-0.23252	0.06	0.195	0.02
2020-031-AL_240			2304	2305	2304.5	0.2297	0.06	-0.3085	0.02
2022-05-93			2312	2313	2312.5	0.32853	0.06	-0.067	0.02
2022-05-94			2320	2321	2320.5	0.17912	0.06	0.122	0.02
2020-031-AL_241			2328	2329	2328.5	0.099982	0.06	-0.1115	0.02
2022-05-96			2336	2337	2336.5	-0.28131	0.06	0.068	0.02
2020-031-AL_242			2352	2353	2352.5	0.11988	0.06	-0.184	0.02
2022-05-97			2360	2361	2360.5	0.055122	0.06	-0.234	0.02
2022-05-98			2368	2369	2368.5	0.10493	0.06	0.541	0.02
2020-031-AL_243			2376	2377	2376.5	-0.081303	0.06	-0.0155	0.02
2022-05-100			2384	2385	2384.5	-0.010944	0.06	-0.23	0.02
2022-05-101			2392	2393	2392.5	-0.40836	0.06	0.018	0.02
2020-031-AL_244			2400	2401	2400.5	-0.172081	0.06	-0.053	0.02
2022-05-103			2408	2409	2408.5	0.030729	0.06	-0.531	0.02
2022-05-104			2416	2417	2416.5	-0.24	0.06	0.01	0.02
2020-031-AL_245			2424	2425	2424.5	0.028915	0.06	0.1175	0.02
2022-05-106			2432	2433	2432.5	-0.05	0.06	-0.65	0.02
2022-05-107			2440	2441	2440.5	0.13	0.06	0.17	0.02
2020-031-AL_246			2448	2449	2448.5	0.139534	0.06	-0.0965	0.02
2022-05-109			2456	2457	2456.5	-0.044485	0.06	-0.16	0.02
2022-05-110			2464	2465	2464.5	0.32752	0.06	0.061	0.02
2020-031-AL_247			2472	2473	2472.5	-0.221196	0.06	-0.028	0.02
2022-05-112			2480	2481	2480.5	-0.14104	0.06	-0.04	0.02
2022-05-113			2488	2489	2488.5	0.11916	0.06	0.027	0.02
2020-031-AL_248			2496	2497	2496.5	-0.37935	0.06	-0.287	0.02
2022-05-115			2504	2505	2504.5	0.16184	0.06	0.218	0.02
2022-05-116			2512	2513	2512.5	0.31126	0.06	-0.13	0.02
2020-031-AL_249			2520	2521	2520.5	0.1771	0.06	-0.144	0.02
2022-05-118			2528	2529	2528.5	0.14558	0.06	-0.127	0.02
2022-05-119			2536	2537	2536.5	-0.031272	0.06	-0.299	0.02
2020-031-AL_250			2544	2545	2544.5	0.062388	0.06	-0.02	0.02
2022-05-121			2552	2553	2552.5	-0.084124	0.06	-0.116	0.02
2022-05-122			2560	2561	2560.5	0.2828	0.06	-0.32	0.02
2020-031-AL_251			2568	2569	2568.5	0.5114	0.06	0.137	0.02
2022-05-124			2576	2577	2576.5	0.26552	0.06	-0.037	0.02
2022-05-125			2584	2585	2584.5	0.23604	0.06	-0.112	0.02
2020-031-AL_252			2592	2593	2592.5	0.290085	0.06	-0.063	0.02
2022-05-127			2600	2601	2600.5	0.40171	0.06	-0.383	0.02
2022-05-128			2608	2609	2608.5	0.24011	0.06	-0.25	0.02
2020-031-AL_253			2616	2617	2616.5	0.30001	0.06	-0.0655	0.02
2022-05-130			2624	2625	2624.5	0.14965	0.06	0.142	0.02
2022-05-131			2632	2633	2632.5	-0.010944	0.06	-0.142	0.02
2020-031-AL_254			2640	2641	2640.5	0.153201	0.06	-0.05	0.02
2022-05-133			2648	2649	2648.5	0.067319	0.06	-0.363	0.02
2022-05-134			2656	2657	2656.5	0.26247	0.06	-0.398	0.02
2020-031-AL_255			2664	2665	2664.5	0.250805	0.06	0.2135	0.02
2022-05-136			2672	2673	2672.5	0.043942	0.06	-0.228	0.02
2022-05-137			2680	2681	2680.5	-0.38396	0.06	-0.174	0.02
2020-031-AL_256			2688	2689	2688.5	0.37745	0.06	0.139	0.02
2022-05-139			2696	2697	2696.5	-0.23862	0.06	-0.421	0.02
2022-05-140			2704	2705	2704.5	0.23299	0.06	-0.48	0.02
2020-031-AL_257			2712	2713	2712.5	0.260974	0.06	-0.098	0.02
2022-05-142			2720	2721	2720.5	-0.29249	0.06	-0.073	0.02
2022-05-143			2728	2729	2728.5	-0.45613	0.06	0.067	0.02
2020-031-AL_258			2736	2737	2736.5	-0.462255	0.06	-0.314	0.02
2022-05-145			2744	2745	2744.5	-0.20101	0.06	0.005	0.02
2022-05-146			2752	2753	2752.5	-0.064813	0.06	-0.526	0.02
2020-031-AL_259		low signal (not enough material to rerun)	2760	2761	2760.5	-0.029239	0.06	-0.113	0.02
2022-05-148			2768	2769	2768.5	-0.27724	0.06	-0.41	0.02
2022-05-149			2776	2777	2776.5	-0.1319	0.06	-0.817	0.02
2020-031-AL_260			2784	2785	2784.5	-0.0846	0.06	-0.0925	0.02
2022-05-151			2792	2793	2792.5	-0.49882	0.06	-0.462	0.02
2022-05-152			2800	2801	2800.5	-0.44291	0.06	0.11	0.02
2020-031-AL_261			2808	2809	2808.5	-0.00986	0.06	-0.1225	0.02
2022-05-154			2816	2817	2816.5	-0.075993	0.06	-0.081	0.02
2022-05-155			2824	2825	2824.5	0.077483	0.06	-0.045	0.02
2020-031-AL_262			2832	2833	2832.5	0.14193	0.06	-0.1195	0.02
2022-05-157			2840	2841	2840.5	0.13745	0.06	-0.099	0.02
2022-05-158			2848	2849	2848.5	-0.1014	0.06	-0.073	0.02
2020-031-AL_263			2856	2857	2856.5	-0.320095	0.06	-0.1095	0.02
2022-05-160			2864	2865	2864.5	-0.4917	0.06	-0.341	0.02
2022-05-161			2872	2873	2872.5	-0.04855	0.06	-0.167	0.02
2020-031-AL_264			2880	2881	2880.5	-0.64739	0.06	-0.1735	0.02
2022-05-163			2888	2889	2888.5	-0.042452	0.06	-0.19	0.02
2022-05-164			2896	2897	2896.5	-1.0294	0.06	-0.002	0.02
2020-031-AL_265			2904	2905	2904.5	-0.542935	0.06	-0.2805	0.02
2022-05-166			2912	2913	2912.5	-0.45511	0.06	-1.077	0.02
2022-05-167			2920	2921	2920.5	-0.47747	0.06	-0.376	0.02
2020-031-AL_266			2928	2929	2928.5	-0.41457	0.06	-0.205	0.02
2022-05-169			2936	2937	2936.5	-0.72954	0.06	0.03	0.02
2022-05-170			2944	2945	2944.5	-0.67567	0.06	-0.608	0.02
2020-031-AL_267			2952	2953	2952.5	-0.027491	0.06	-0.1405	0.02
Rerun 2022-05-172			2960	2961	2960.5	-0.13799	0.06	-0.147	0.02
Rerun 2022-05-173		suspect value	2968	2969	2968.5	1.2931	0.06	0.549	0.02
2020-031-AL_268			2976	2977	2976.5	-0.561075	0.06	-0.8135	0.02
2022-05-175			2984	2985	2984.5	-0.047534	0.06	-0.362	0.02
2022-05-176			2992	2993	2992.5	-0.44698	0.06	-0.574	0.02
2020-031-AL_269			3000	3001	3000.5	-0.233585	0.06	-0.4055	0.02
2022-05-178			3008	3009	3008.5	-0.16645	0.06	-0.171	0.02
2022-05-179			3016	3017	3016.5	-0.60757	0.06	-0.342	0.02
2020-031-AL_270			3024	3025	3024.5	-0.53663	0.06	-0.3415	0.02
2022-05-181			3032	3033	3032.5	-0.06278	0.06	-0.944	0.02
2022-05-182			3040	3041	3040.5	-0.54252	0.06	-0.317	0.02
2020-031-AL_271			3048	3049	3048.5	-0.121455	0.06	0.411	0.02
2022-05-184			3056	3057	3056.5	-0.21219	0.06	-0.5	0.02
2022-05-185			3064	3065	3064.5	-0.41445	0.06	-0.148	0.02
2020-031-AL_272			3072	3073	3072.5	-0.321295	0.06	-0.2535	0.02
2022-05-187			3080	3081	3080.5	-0.4236	0.06	0.313	0.02
2022-05-188			3088	3089	3088.5	-0.27622	0.06	-0.484	0.02
2020-031-AL_273			3096	3097	3096.5	0.0562085	0.06	-0.0795	0.02
2022-05-190			3104	3105	3104.5	-0.19796	0.06	-0.693	0.02
2022-05-191			3112	3113	3112.5	-0.42563	0.06	-1.119	0.02
2020-031-AL_274			3120	3121	3120.5	-0.42812	0.06	-0.4155	0.02
2022-05-193			3128	3129	3128.5	-0.2996	0.06	-0.228	0.02
2022-05-194			3136	3137	3136.5	-0.30977	0.06	-0.568	0.02
2020-031-AL_275			3144	3145	3144.5	-0.193655	0.06	-0.205	0.02
2022-05-196			3152	3153	3152.5	-0.50593	0.06	-0.125	0.02
2020-031-AL_276			3168	3169	3168.5	0.196151	0.06	0.044	0.02
2022-05-198			3176	3177	3176.5	-0.1939	0.06	0.066	0.02
2022-05-199			3184	3185	3184.5	-0.03737	0.06	-0.482	0.02
2020-031-AL_277			3192	3193	3192.5	-0.397665	0.06	-0.493	0.02
2022-05-201			3200	3201	3200.5	0.0063352	0.06	-0.39	0.02
2022-05-202			3208	3209	3208.5	-0.63908	0.06	2.046	0.02
2020-031-AL_278			3216	3217	3216.5	-0.326305	0.06	1.25	0.02
2022-05-204			3224	3225	3224.5	-0.5476	0.06	2.112	0.02
2022-05-205			3232	3233	3232.5	-0.7336	0.06	2.081	0.02
2020-031-AL_279			3240	3241	3240.5	-0.34929	0.06	1.1305	0.02
2022-05-207			3248	3249	3248.5	-0.36872	0.06	2.515	0.02
2022-05-208		v. small	3256	3257	3256.5	0.086631	0.06	3.374	0.02
2020-031-AL_280			3264	3265	3264.5	3.0202	0.06	0.176	0.02
2022-05-209		Skipped MD20-3592; 3296 (2022-05-210)	3277	3278	3277.5	-0.31485	0.06	0.084	0.02
2020-031-AL_281			3288	3289	3288.5	-0.46745	0.06	-0.534	0.02
Not enough (only 10ug)			3312	3313	3312.5	-0.73259	0.06	-0.465	0.02
2022-05-212			3320	3321	3320.5	-0.47137	0.06	-0.455	0.02
2022-05-213			3328	3329	3328.5	-0.71633	0.06	-0.179	0.02
2020-031-AL_282			3336	3337	3336.5	-0.396035	0.06	0.1985	0.02
2022-05-215			3344	3345	3344.5	-0.28537	0.06	0.285	0.02
2022-05-216			3352	3353	3352.5	-1.1066	0.06	-0.323	0.02
2020-031-AL_283			3360	3361	3360.5	-0.652065	0.06	0.0075	0.02
2022-05-218			3368	3369	3368.5	-0.30875	0.06	-0.055	0.02
2022-05-219			3376	3377	3376.5	-0.85659	0.06	0.357	0.02
2020-031-AL_284			3384	3385	3384.5	-0.48464	0.06	0.31	0.02
2022-05-220			3408	3409	3408.5	-0.30977	0.06	-0.184	0.02
2022-05-221			3416	3417	3416.5	-0.64721	0.06	-0.421	0.02
2022-05-222			3424	3425	3424.5	-0.51203	0.06	-0.176	0.02
2022-05-223			3440	3441	3440.5	-0.54354	0.06	-0.124	0.02
2022-05-224			3448	3449	3448.5	-0.54252	0.06	0.212	0.02
2020-031-AL_285			3456	3457	3456.5	-0.47995	0.06	-0.055	0.02
2022-05-226			3464	3465	3464.5	-0.21321	0.06	0.298	0.02
2022-05-227			3472	3473	3472.5	-0.95315	0.06	-0.024	0.02
2020-031-AL_286			3480	3481	3480.5	-0.667405	0.06	-0.157	0.02
2022-05-229			3488	3489	3488.5	-0.47747	0.06	-0.285	0.02
2022-05-230			3496	3497	3496.5	-0.52524	0.06	-0.023	0.02
2020-031-AL_287			3504	3505	3504.5	-0.578465	0.06	0.138	0.02
2022-05-232			3512	3513	3512.5	-0.62485	0.06	-0.163	0.02
2022-05-233			3520	3521	3520.5	-0.68583	0.06	-0.112	0.02
2020-031-AL_288			3528	3529	3528.5	-0.412755	0.06	0.0445	0.02
2022-05-235			3544	3545	3544.5	-0.89216	0.06	0.348	0.02
Not enough (6ug)			3552	3553	3552.5	-0.45511	0.06	-0.45	0.02
2022-05-237			3560	3561	3560.5	-0.3555	0.06	0.063	0.02
2022-05-238			3568	3569	3568.5	-0.42055	0.06	-0.026	0.02
2020-031-AL_289			3576	3577	3576.5	-1.1185	0.06	-0.406	0.02
2022-05-239			3584	3585	3584.5	-0.40226	0.06	0.319	0.02
2022-05-240			3592	3593	3592.5	-0.23658	0.06	0.023	0.02
2022-05-241			3608	3609	3608.5	-1.0589	0.06	0.556	0.02
2022-05-242			3616	3617	3616.5	-1.3312	0.06	1.163	0.02
2020-031-AL_290			3624	3625	3624.5	-0.278026	0.06	-0.433	0.02
2022-05-244			3632	3633	3632.5	-1.2682	0.06	0.836	0.02
2022-05-245			3640	3641	3640.5	-1.1056	0.06	0.511	0.02
2020-031-AL_291			3648	3649	3648.5	-1.1374	0.06	0.3185	0.02
2022-05-247			3656	3657	3656.5	-1.4583	0.06	-0.012	0.02
2022-05-248			3664	3665	3664.5	-1.1361	0.06	0.067	0.02
2020-031-AL_292			3672	3673	3672.5	-0.95937	0.06	0.0915	0.02
2022-05-250			3680	3681	3680.5	-0.93282	0.06	-0.242	0.02
2022-05-251			3688	3689	3688.5	-0.65432	0.06	-0.254	0.02
2020-031-AL_293			3696	3697	3696.5	-0.9365	0.06	-0.2595	0.02
2022-05-253			3704	3705	3704.5	-0.39311	0.06	-0.266	0.02
2022-05-254			3712	3713	3712.5	-0.20609	0.06	-0.18	0.02
2020-031-AL_294			3720	3721	3720.5	-0.293934	0.06	-0.1935	0.02
2022-05-256			3728	3729	3728.5	-0.036354	0.06	0.072	0.02
2022-05-257			3736	3737	3736.5	-0.045501	0.06	-0.336	0.02
2020-031-AL_295			3744	3745	3744.5	-0.59059	0.06	0.1485	0.02
2022-05-259			3752	3753	3752.5	-0.4358	0.06	0.145	0.02
2022-05-260		?? Valve?	3760	3761	3760.5	2.4203	0.06	0.26	0.02
2020-031-AL_296			3768	3769	3768.5	-0.249805	0.06	-0.089	0.02
2022-05-262			3776	3777	3776.5	-0.0028124	0.06	-0.143	0.02
2022-05-263			3784	3785	3784.5	-0.32501	0.06	0.445	0.02
2020-031-AL_297			3792	3793	3792.5	0.43933	0.06	-0.867	0.02
2022-05-264			3800	3801	3800.5	0.40578	0.06	-0.01	0.02
2022-05-265			3808	3809	3808.5	-0.18068	0.06	0.288	0.02
2020-031-AL_298			3816	3817	3816.5	0.641152	0.06	0.1835	0.02
2022-05-267			3824	3825	3824.5	-0.40226	0.06	0.141	0.02
2022-05-268			3832	3833	3832.5	-0.068878	0.06	0.142	0.02
2020-031-AL_299			3840	3841	3840.5	-0.39599	0.06	0.097	0.02
2022-05-270		rerun	3848	3849	3848.5	-0.70818	0.06	0.483	0.02
2022-05-271			3856	3857	3856.5	-0.84541	0.06	0.154	0.02
2022-05-272			3872	3873	3872.5	0.14965	0.06	0.006	0.02
2022-05-273		??	3880	3881	3880.5	1.4181	0.06	0.936	0.02
2020-031-AL_300			3888	3889	3888.5	-0.476725	0.06	-0.2035	0.02
2022-05-275			3896	3897	3896.5	-0.49577	0.06	0.634	0.02
2022-05-276			3904	3905	3904.5	-1.2764	0.06	0.106	0.02
2020-031-AL_301		small, marginal but likely ok	3912	3913	3912.5	0.4181	0.06	0.239	0.02
2022-05-277			3920	3921	3920.5	-0.52423	0.06	-0.047	0.02
2022-05-278			3928	3929	3928.5	-0.77528	0.06	0.1	0.02
2020-031-AL_302			3936	3937	3936.5	-0.556505	0.06	-0.0595	0.02
2022-05-280			3944	3945	3944.5	-0.6218	0.06	-0.107	0.02
2020-031-AL_303			3960	3961	3960.5	-0.70376	0.06	0.3425	0.02
2022-05-282			3968	3969	3968.5	-0.14917	0.06	-0.114	0.02
2022-05-283			3976	3977	3976.5	-0.8017	0.06	0.407	0.02
2020-031-AL_304			3984	3985	3984.5	-0.777565	0.06	0.2545	0.02
2022-05-285			3992	3993	3992.5	-1.0406	0.06	0.04	0.02
2022-05-286			4000	4001	4000.5	-0.61	0.06	0.05	0.02
2020-031-AL_305			4008	4009	4008.5	-0.699515	0.06	-0.1245	0.02
2022-05-288			4016	4017	4016.5	-1.05	0.06	-0.01	0.02
2022-05-289			4024	4025	4024.5	-0.5	0.06	0.6	0.02
2020-031-AL_306			4032	4033	4032.5	-0.65662	0.06	0.295	0.02
2022-05-291			4040	4041	4040.5	-1.0812	0.06	0.112	0.02
2022-05-292			4048	4049	4048.5	-0.42055	0.06	-0.56	0.02
2020-031-AL_307			4056	4057	4056.5	-0.664145	0.06	-0.2275	0.02
2022-05-294			4064	4065	4064.5	-0.21219	0.06	0.016	0.02
2022-05-295			4072	4073	4072.5	-0.047534	0.06	0.086	0.02
2020-031-AL_308			4080	4081	4080.5	0.125065	0.06	-0.0675	0.02
2022-05-297			4088	4089	4088.5	-0.26199	0.06	-0.184	0.02
2022-05-298			4096	4097	4096.5	0.019548	0.06	0.166	0.02
2020-031-AL_309			4104	4105	4104.5	-0.11827	0.06	0.074	0.02
2022-05-300			4112	4113	4112.5	-0.28232	0.06	-0.211	0.02
2022-05-301			4120	4121	4120.5	-0.4795	0.06	-0.078	0.02
2020-031-AL_310			4128	4129	4128.5	-0.152276	0.06	-0.094	0.02
2022-05-303			4136	4137	4136.5	0.14152	0.06	-0.379	0.02
2022-05-304			4144	4145	4144.5	-0.10953	0.06	-0.034	0.02
2020-031-AL_311			4152	4153	4152.5	0.066815	0.06	-0.3115	0.02
Rerun 2022-05-306			4160	4161	4160.5	-0.11157	0.06	0.15	0.02
2022-05-307			4168	4169	4168.5	-0.29655	0.06	0.235	0.02
2020-031-AL_312			4176	4177	4176.5	-0.28687	0.06	-0.068	0.02
2022-05-309			4184	4185	4184.5	-0.21117	0.06	-0.038	0.02
2022-05-310			4192	4193	4192.5	-0.095305	0.06	0.312	0.02
2020-031-AL_313			4200	4201	4200.5	0.184471	0.06	0.3925	0.02
2022-05-312			4208	4209	4208.5	-0.13596	0.06	0.113	0.02
2022-05-313			4216	4217	4216.5	0.032762	0.06	-0.02	0.02
2020-031-AL_314			4224	4225	4224.5	-0.202125	0.06	-0.1375	0.02
2022-05-315			4232	4233	4232.5	-0.36363	0.06	-0.091	0.02
Rerun 2022-05-316			4240	4241	4240.5	-0.37982	0.06	-0.255	0.02
2020-031-AL_315			4248	4249	4248.5	-0.223801	0.06	0.342	0.02
2022-05-318			4256	4257	4256.5	-0.39514	0.06	0.125	0.02

## Sheet: N. Incompta isotopes
Purcell et al., 2025
Oxygen and carbon isotopes for N. Incompta foraminifera shells.
FARLAB Sample ID		Run	Material	Comments	Top depth (cm)	Bottom depth (cm)	Mean depth (cm)	d 18O/16O Mean	STDEV d 18O/16O	d 13C/12C Mean	STDEV d 13C/12C
2020-031-AL_316			N.incompta		1296	1297	1296.5	1.3956	0.06	-0.877	0.02
2020-031-AL_317			N.incompta		1320	1321	1320.5	1.3501	0.06	-0.311	0.02
2020-031-AL_318			N.incompta		1344	1345	1344.5	1.1298	0.06	0.083	0.02
2020-031-AL_319			N.incompta		1368	1369	1368.5	1.3077	0.06	-0.417	0.02
2020-031-AL_320			N.incompta		1392	1393	1392.5	1.2167	0.06	-0.444	0.02
2020-031-AL_321			N.incompta		1704	1705	1704.5	0.75776	0.06	-0.737	0.02
2020-031-AL_322			N.incompta		3360	3361	3360.5	1.0216	0.06	-0.366	0.02
2020-031-AL_323			N.incompta		3384	3385	3384.5	1.148	0.06	-0.564	0.02
2020-031-AL_324		(MS20-13)	N.incompta	small, marginal but likely ok	3432	3433	3432.5	1.2248	0.06	0.354	0.02	small, marginal but likely ok
2020-031-AL_325			N.incompta		3456	3457	3456.5	0.79921	0.06	-0.35	0.02
2020-031-AL_326			N.incompta		3480	3481	3480.5	1.0378	0.06	0.177	0.02
2020-031-AL_327			N.incompta		3504	3505	3504.5	0.71732	0.06	-0.039	0.02
2020-031-AL_328			N.incompta		3528	3529	3528.5	0.24119	0.06	-0.716	0.02
2020-031-AL_329			N.incompta		3552	3553	3552.5	1.0519	0.06	-0.253	0.02
2020-031-AL_330			N.incompta		3576	3577	3576.5	1.0489	0.06	-0.209	0.02
2020-031-AL_331			N.incompta		3600	3601	3600.5	0.56367	0.06	-0.618	0.02
2020-031-AL_332			N.incompta		3624	3625	3624.5	0.70317	0.06	-0.151	0.02
2020-031-AL_333			N.incompta		3744	3745	3744.5	0.61927	0.06	-1.428	0.02
2020-031-AL_334			N.incompta		3768	3769	3768.5	0.79921	0.06	-1.388	0.02
2020-031-AL_335		(MS20-13)	N.incompta	small, marginal but likely ok	3792	3793	3792.5	1.1561	0.06	-0.184	0.02	small, marginal but likely ok
2020-031-AL_336		MS20-12	N.incompta		3816	3817	3816.5	0.64858	0.06	-0.641	0.02
2020-031-AL_337			N.incompta		3840	3841	3840.5	0.92557	0.06	-0.573	0.02
2020-031-AL_338			N.incompta	extremaly small, questionable	3864	3865	3864.5	0.96398	0.06	-0.958	0.02	extremaly small, questionable
2020-031-AL_339			N.incompta		3888	3889	3888.5	1.0631	0.06	-0.302	0.02
2020-031-AL_340			N.incompta	not enough signal (not enough to rerun)	3912	3913	3912.5					not enough signal (not enough to rerun)
2020-031-AL_341			N.incompta		3936	3937	3936.5	0.085511	0.06	-0.592	0.02
2020-031-AL_342			N.incompta		3960	3961	3960.5	0.76787	0.06	-0.147	0.02
		*MS20-13 was a run done with small samples at the end
