# Supplementary material for: Climate variability off Africa's southern Cape over the past 260 000 years
Source: Copernicus journal article supplement (doi:10.5194/cp-21-1383-2025), 2025-07-31
Supplement: Supplementary file 2 [file cp-21-1383-2025-supplement.zip]

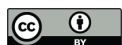

## *Supplement of*

# **Climate variability off Africa's southern Cape over the past 260 000 years**

**Karl Purcell et al.**

*Correspondence to:* Margit H. Simon ([msim@norceresearch.no](mailto:msim@norceresearch.no))

- [cp-21-1383-2025-supplement-title-page.pdf](#)
- [Data - Purcell et al. 2025.xlsx](#)
- [Supplementary Material - Purcell et al. 2025.pdf](#)

The copyright of individual parts of the supplement might differ from the article licence.
